# Supplementary material for: Synthesis of a TNF inhibitor, flurbiprofen and an i-Pr analogue in enantioenriched forms by copper-catalyzed propargylic substitution with Grignard reagents
Source: Royal Society of Chemistry journal article supplement (doi:10.1039/d1ob01944a), 2021-01-01

## Supplementary Material

### Synthesis of the TNF inhibitor, flurbiprofen and an *i*-Pr analogue in enantioenriched forms by using the copper-catalyzed propargylic substitution with Grignard reagents

Yuji Takashima,<sup>a</sup> Yukari Isogawa,<sup>a</sup> Atsuki Tsuboi,<sup>b</sup> Narihito Ogawa\*<sup>b</sup> and  
Yuichi Kobayashi\*<sup>a,c</sup>

<sup>a</sup> Department of Biomolecular Engineering, Tokyo Institute of Technology, Nagatsuta-cho 4259, Midori-ku, Yokohama 226-8501, Japan

<sup>b</sup> Department of Applied Chemistry, Meiji University, 1-1-1, Higashimita, Tama-ku, Kawasaki, Kanagawa 214-8571, Japan

<sup>c</sup> Organization for the Strategic Coordination of Research and Intellectual Properties, Meiji University, 1-1-1, Higashimita, Tama-ku, Kawasaki, Kanagawa 214-8571, Japan

#### Table of Contents

|                                                                                     |     |
|-------------------------------------------------------------------------------------|-----|
| 1. General information .....                                                        | S2  |
| 2. Experimental procedures and characterization data .....                          | S2  |
| 3. Synthesis of the precursor of the Grignard reagent <b>8</b> .....                | S15 |
| 4. References .....                                                                 | S17 |
| 5. Calculation of ratios by <sup>1</sup> H NMR spectroscopy and HPLC analysis ..... | S18 |
| 6. <sup>1</sup> H, <sup>13</sup> C and <sup>13</sup> C–APT NMR spectra .....        | S29 |

## 1. General information

The  $^1\text{H}$ ,  $^{13}\text{C}$  and  $^{13}\text{C}$ -attached proton test ( $^{13}\text{C}$ -APT) NMR spectroscopic data were recorded in  $\text{CDCl}_3$  using  $\text{Me}_4\text{Si}$  ( $\delta = 0$  ppm) and the centerline of the triplet ( $\delta = 77.1$  ppm) as internal standards, respectively. The  $^{19}\text{F}$  NMR data were measured in  $\text{CDCl}_3$  with  $\text{PhCF}_3$  ( $\delta = -63.72$  ppm). Signal patterns are indicated as br s (broad singlet), s (singlet), d (doublet), t (triplet), q (quartet) and m (multiplet). Coupling constants ( $J$ ) are given in Hertz (Hz). Chemical shifts of carbons are accompanied by  $^{13}\text{C}$ -APT signal patterns as minus (downward for C and  $\text{CH}_2$ ) and plus (upward for CH and  $\text{CH}_3$ ). The solvents that were distilled prior to use are THF (from Na/benzophenone),  $\text{Et}_2\text{O}$  (from Na/benzophenone), and  $\text{CH}_2\text{Cl}_2$  (from  $\text{CaH}_2$ ). Crude products were purified by column chromatography on silica gel (Merck, silica gel 60 and KANTO, silica gel 60N).

## 2. Experimental procedures and characterization data

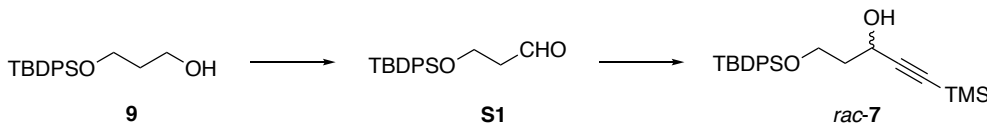

### 5-(*tert*-Butyldiphenylsilyloxy)-1-(trimethylsilyl)pent-1-yn-3-ol (*rac-7*)

To an ice-cold solution of alcohol **9**<sup>S1,S2</sup> (1.64 g, 5.21 mmol) in  $\text{CH}_2\text{Cl}_2$  (10 mL) were added DMSO (1.48 mL, 20.8 mmol) and  $\text{Et}_3\text{N}$  (2.18 mL, 15.6 mmol). The solution was stirred at 0 °C for 1 h, and  $\text{SO}_3 \cdot \text{pyridine}$  (1.66 g, 10.4 mmol) was added. The solution was stirred at room temperature for 1 h and diluted with  $\text{H}_2\text{O}$  and brine. The mixture was extracted with  $\text{EtOAc}$  twice. The combined organic layers were dried over  $\text{MgSO}_4$  and concentrated. The residue was passed through a short column of silica gel (hexane/ $\text{EtOAc}$ ) to give aldehyde **S1**, which was dissolved in THF (5 mL) for the next reaction. Liquid.  $R_f = 0.59$  (hexane/ $\text{EtOAc} = 3:1$ ).  $^1\text{H}$  NMR (300 MHz,  $\text{CDCl}_3$ )  $\delta$  1.04 (s, 9 H), 2.61 (dt,  $J = 2.1, 6.0$  Hz, 2 H), 4.02 (t,  $J = 6.0$  Hz, 2 H), 7.32–7.48 (m, 6 H), 7.62–7.69 (m, 4 H), 9.82 (t,  $J = 2.1$  Hz, 1 H). The spectrum was coincident with the reported data.<sup>S2</sup>

To the above THF solution cooled to 0 °C was added *n*-BuLi (1.60 M in hexane, 4.24 mL, 6.78 mmol) dropwise. The solution was stirred at 0 °C for 30 min and cooled to –78



°C. The above aldehyde in THF was added to the solution, which was then stirred at -78 °C for 1 h and poured to a mixture of saturated NH<sub>4</sub>Cl and EtOAc with vigorous stirring. The organic phase was separated, and the aqueous phase was extracted with EtOAc twice. The combined organic layers were dried over MgSO<sub>4</sub> and concentrated to afford a residue, which was purified by chromatography on silica gel (hexane/EtOAc) to give alcohol *rac-7* (1.65 g, 77% over two steps). Liquid. *R*<sub>f</sub> = 0.35 (hexane/EtOAc = 19:1, two-development) (cf. the above aldehyde, *R*<sub>f</sub> = 0.43). IR (neat) 3429, 2170, 1251, 1112, 844 cm<sup>-1</sup>. <sup>1</sup>H NMR (300 MHz, CDCl<sub>3</sub>) δ 0.17 (s, 9 H), 1.05 (s, 9 H), 1.84–1.97 (m, 1 H), 1.98–2.10 (m, 1 H), 3.28 (d, *J* = 6.0 Hz, 1 H), 3.83 (ddd, *J* = 10.5, 6.0, 4.5 Hz, 1 H), 4.05 (ddd, *J* = 10.5, 7.8, 3.9 Hz, 1 H), 4.70 (dt, *J* = 4.5, 6.3 Hz, 1 H), 7.36–7.48 (m, 6 H), 7.64–7.72 (m, 4 H). <sup>13</sup>C NMR (75 MHz, CDCl<sub>3</sub>) δ -0.0 (+), 19.1 (-), 26.8 (+), 38.8 (-), 61.8 (-), 61.9 (+), 89.4 (-), 106.3 (-), 127.8 (+), 129.9 (+), 133.00 (-), 133.04 (-), 135.53 (+), 135.56 (+). HRMS (FAB) calcd for C<sub>24</sub>H<sub>35</sub>O<sub>2</sub>Si<sub>2</sub> [(M+H)<sup>+</sup>] 411.2176, found 411.2172. The <sup>1</sup>H NMR and <sup>13</sup>C NMR spectral data were consistent with the reported data,<sup>S3</sup> while the <sup>13</sup>C NMR spectrum was updated.

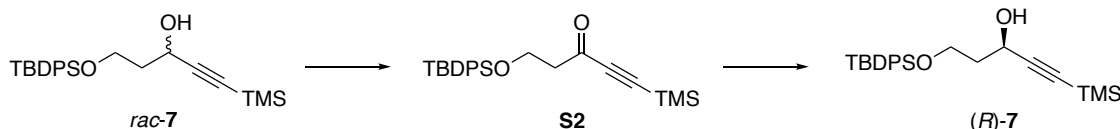

**(R)-5-(tert-Butyldiphenylsilyloxy)-1-(trimethylsilyl)pent-1-yn-3-ol [(R)-7]**

To an ice-cold solution of *rac*-**7** (1.65 g, 4.02 mmol) in CH<sub>2</sub>Cl<sub>2</sub> (16 mL) were added Celite (2.60 g) and PCC (1.30 g, 6.03 mmol). The mixture was stirred at room temperature for 18 h, diluted with hexane and filtered through a pad of Celite with hexane. The filtrate was concentrated and the residue was purified by chromatography on silica gel (hexane/EtOAc) to give ketone **S2** (1.23 g, 75%). Liquid. *R*<sub>f</sub> = 0.57 (hexane/EtOAc = 9:1). IR (neat) 2151, 1681, 1113, 847, 702 cm<sup>-1</sup>. <sup>1</sup>H NMR (300 MHz, CDCl<sub>3</sub>) δ 0.23 (s, 9 H), 1.03 (s, 9 H), 2.78 (t, *J* = 6.2 Hz, 2 H), 4.01 (t, *J* = 6.2 Hz, 2 H), 7.34–7.47 (m, 6 H), 7.62–7.74 (m, 4 H). <sup>13</sup>C NMR (75 MHz, CDCl<sub>3</sub>) δ -0.7 (+), 19.2 (-), 26.8 (+), 48.0 (-), 59.4 (-), 98.2 (-), 102.0 (-), 127.7 (+), 129.8 (+), 133.4 (-), 135.6 (+), 186.2 (-). The <sup>1</sup>H NMR and <sup>13</sup>C NMR spectral data were coincident with the reported data.<sup>S4</sup>

A mixture of RuCl[(*R,R*)-TsDPEN](*p*-cymene) (39.6 mg, 0.0622 mmol) and KOH (ca. 7.5 mg, 0.13 mmol) in CH<sub>2</sub>Cl<sub>2</sub> (2.5 mL) was stirred at room temperature for 5 min and

washed with H<sub>2</sub>O twice. The remaining CH<sub>2</sub>Cl<sub>2</sub> layer was transferred to another flask, dried over CaH<sub>2</sub> and concentrated to afford solids, which was dissolved in *i*-PrOH (3 mL) for the next reaction. To an ice-cold solution of the above ketone (254 mg, 0.621 mmol) in *i*-PrOH (3 mL) was added the above *i*-PrOH solution of the catalyst. The solution was stirred at 30 °C for 15 h and diluted with H<sub>2</sub>O and saturated NaHCO<sub>3</sub>. The product was extracted with EtOAc twice. The combined organic layers were dried over MgSO<sub>4</sub> and concentrated to afford a residue, which was passed through a short column of silica gel (hexane/EtOAc) to give alcohol (*R*)-**7** (247 mg, 97%). 97.5% ee by HPLC analysis of the corresponding benzoate (Chiralcel OD-H, hexane/*i*-PrOH = 99.9:0.1, 0.3 mL/min, 25 °C, *t*<sub>R</sub> = 30.9 and 40.7 min for (*R*)-isomer (major) and (*S*)-isomer (minor), respectively. The <sup>1</sup>H and <sup>13</sup>C NMR spectra were identical with those of the racemic alcohol *rac*-**7**.

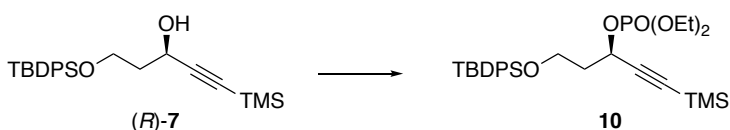

**(*R*)-5-(*tert*-Butyldiphenylsilyloxy)-1-(trimethylsilyl)pent-1-yn-3-yl diethyl phosphate (**10**)**

To a solution of (*R*)-**7** (234 mg, 0.570 mmol) in CH<sub>2</sub>Cl<sub>2</sub> (2.3 mL) were added *N*-methylimidazole (0.117 mL, 1.48 mmol) and diethyl chlorophosphate (0.205 mL, 1.43 mmol). The solution was stirred at room temperature for 2 h and diluted with 1 N HCl. The mixture was extracted with CH<sub>2</sub>Cl<sub>2</sub> twice. The combined organic layers were washed with saturated NaHCO<sub>3</sub> and then with brine. The combined organic layers were dried over MgSO<sub>4</sub> and concentrated to afford a residue, which was purified by chromatography on silica gel (hexane/EtOAc) to give phosphate **10** (266 mg, 85%). Liquid. *R*<sub>f</sub> = 0.21 (hexane/EtOAc = 5:1). [*α*]<sub>D</sub><sup>24</sup> +19 (*c* 0.24, CHCl<sub>3</sub>). IR (neat) 2178, 1112, 1035, 846 cm<sup>-1</sup>. <sup>1</sup>H NMR (300 MHz, CDCl<sub>3</sub>) δ 0.15 (s, 9 H), 1.05 (s, 9 H), 1.32 (dq, *J* = 0.9, 7.2 Hz, 6 H), 1.94–2.22 (m, 2 H), 3.81 (t, *J* = 6.2 Hz, 2 H), 4.00–4.21 (m, 4 H), 5.24 (q, *J* = 7.2 Hz, 1 H), 7.33–7.46 (m, 6 H), 7.60–7.70 (m, 4 H). <sup>13</sup>C NMR (75 MHz, CDCl<sub>3</sub>) δ -0.3 (+), 16.1 (d, *J* = 7 Hz) (+), 19.2 (-), 26.8 (+), 39.4 (d, *J* = 6 Hz) (-), 59.6 (-), 63.7 (d, *J* = 6 Hz) (-), 63.8 (d, *J* = 6 Hz) (-), 65.7 (d, *J* = 6 Hz) (+), 91.8 (-), 102.3 (d, *J* = 3 Hz) (-), 127.7 (+), 129.6 (+), 133.46 (-), 133.49 (-), 135.5 (+). HRMS (FAB) calcd for C<sub>28</sub>H<sub>44</sub>O<sub>5</sub>PSi<sub>2</sub> [(*M*+*H*)<sup>+</sup>] 547.2465, found 547.2449.

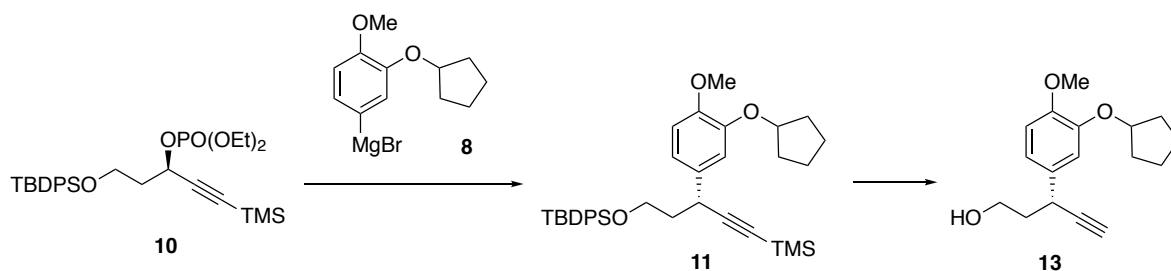

**(S)-3-[3-(Cyclopentyloxy)-4-methoxyphenyl]pent-4-yn-1-ol (13)**

The Grignard reagent **8** in THF was prepared as usual from 4-bromo-2-(cyclopentyloxy)-1-methoxybenzene (1.36 g, 5.02 mmol) and Mg (182 mg, 7.49 mmol) in THF (ca. 5 mL), and a part of the solution (0.95 M, 1.01 mL, 0.960 mmol) was added to an ice-cold solution of CuCN (8.6 mg, 0.096 mmol) in THF (2 mL) and DME (2 mL). The solution was stirred at 0 °C for 30 min, and a solution of phosphate **10** (262 mg, 0.479 mmol) in THF (7 mL) was added dropwise. The solution was stirred at 0 °C for 1.5 h and diluted with saturated NH<sub>4</sub>Cl and NH<sub>4</sub>OH with vigorous stirring. The mixture was extracted with EtOAc twice. The combined organic layers were dried over MgSO<sub>4</sub> and concentrated to afford a residue, which was passed through a short column of silica gel (hexane/EtOAc) to give a mixture of acetylene **11** and the reagent residue, which was diluted with THF (5 mL) for the next reaction. The product **11** was synthesized again and purified by chromatography on silica gel (hexane/EtOAc). Liquid. *R*<sub>f</sub> = 0.74 (hexane/EtOAc = 5:1). [ $\alpha$ ]<sub>D</sub><sup>25</sup> +27 (*c* 1.20, CHCl<sub>3</sub>). IR (neat) 2169, 1507, 1258, 1112, 843 cm<sup>-1</sup>. <sup>1</sup>H NMR (300 MHz, CDCl<sub>3</sub>)  $\delta$  0.15 (s, 9 H), 1.07 (s, 9 H), 1.50–1.66 (m, 2 H), 1.74–2.02 (m, 8 H), 3.68 (dt, *J* = 9.9, 6.0 Hz, 1 H), 3.74–3.98 (m, 2 H), 3.83 (s, 3 H), 4.66–4.84 (m, 1 H), 6.75–6.97 (m, 3 H), 7.32–7.46 (m, 6 H), 7.61–7.72 (m, 4 H). <sup>13</sup>C NMR (75 MHz, CDCl<sub>3</sub>)  $\delta$  0.2 (+), 19.4 (–), 24.1 (–), 27.0 (+), 32.8 (–), 32.9 (–), 34.5 (+), 41.5 (–), 56.2 (+), 61.4 (–), 80.3 (+), 87.0 (–), 108.6 (–), 111.9 (+), 114.4 (+), 119.5 (+), 127.7 (+), 129.6 (+), 133.9 (–), 134.0 (–), 134.1 (–), 135.57 (+), 135.62 (+), 147.6 (–), 148.7 (–).

The above THF solution was cooled to 0 °C and mixed with TBAF (1.0 M in THF, 2.90 mL, 2.90 mmol) and AcOH (0.160 mL, 2.81 mmol). The solution was stirred at room temperature for 24 h and diluted with saturated NH<sub>4</sub>Cl and EtOAc. The organic phase was separated, and the aqueous phase was extracted with EtOAc twice. The combined organic layers were dried over MgSO<sub>4</sub> and concentrated. The residue was purified by chromatography on silica gel (hexane/EtOAc) to give alcohol **13** (122 mg, 93% over two

steps). Liquid.  $R_f$  = 0.55 (hexane/EtOAc = 1:1).  $[\alpha]_D^{22} +13$  ( $c$  1.14,  $\text{CHCl}_3$ ). IR (neat) 3400, 3288, 1507, 1259, 1136  $\text{cm}^{-1}$ .  $^1\text{H}$  NMR (300 MHz,  $\text{CDCl}_3$ )  $\delta$  1.46–1.69 (m, 3 H), 1.75–2.04 (m, 8 H), 2.31 (d,  $J$  = 2.4 Hz, 1 H), 3.69–3.92 (m, 3 H), 3.83 (s, 3 H) 4.74–4.83 (m, 1 H), 6.82 (d,  $J$  = 8.4 Hz, 1 H), 6.87–6.93 (m, 2 H).  $^{13}\text{C}$  NMR (75 MHz,  $\text{CDCl}_3$ )  $\delta$  24.1 (–), 32.7 (–), 32.8 (–), 33.6 (+), 40.8 (–), 56.1 (+), 60.4 (–), 71.3 (–), 80.4 (+), 85.8 (–), 112.0 (+), 114.2 (+), 119.2 (+), 133.3 (–), 147.6 (–), 148.9 (–). HRMS (FAB) calcd for  $\text{C}_{17}\text{H}_{22}\text{O}_3$  ( $\text{M}^+$ ) 274.1569, found 274.1568.

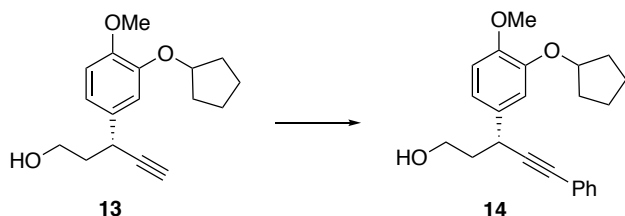

**(*R*)-3-[3-(Cyclopentyloxy)-4-methoxyphenyl]-5-phenylpent-4-yn-1-ol (**14**)**

To a solution of alcohol **13** (111 mg, 0.405 mmol), PhI (0.090 mL, 0.81 mmol) and *t*-BuNH<sub>2</sub> (0.43 mL, 4.06 mmol) in benzene (4 mL) were added Pd(PPh<sub>3</sub>)<sub>4</sub> (45.0 mg, 0.039 mmol) and CuI (23.1 mg, 0.121 mmol). The mixture was stirred at room temperature for 13 h under dark and diluted with saturated NH<sub>4</sub>Cl with vigorous stirring. The product was extracted with EtOAc twice. The combined organic layers were dried over MgSO<sub>4</sub> and concentrated to afford a residue, which was purified by chromatography on silica gel (hexane/EtOAc) to afford Ph acetylene **14** (128 mg, 90%). Liquid;  $R_f$  = 0.64 (hexane/EtOAc = 1:1). 96.9% ee by HPLC analysis (Chiralcel OJ-H, hexane/*i*-PrOH = 90:10, 0.5 mL/min, 25 °C,  $t_R$  = 25.3 and 30.7 min for (*S*)-isomer (minor) and (*R*)-isomer (major), respectively.  $[\alpha]_D^{24} +7$  ( $c$  0.27,  $\text{CHCl}_3$ ). IR (neat) 3406, 1513, 1259, 758  $\text{cm}^{-1}$ .  $^1\text{H}$  NMR (300 MHz,  $\text{CDCl}_3$ )  $\delta$  1.50–1.72 (m, 3 H), 1.76–2.00 (m, 6 H), 2.02–2.12 (m, 2 H), 3.75–3.96 (m, 2 H), 3.84 (s, 3 H), 4.01 (t,  $J$  = 7.4 Hz, 1 H), 4.76–4.84 (m, 1 H), 6.84 (d,  $J$  = 8.1 Hz, 1 H), 6.93–7.01 (m, 2 H), 7.27–7.33 (m, 3 H), 7.40–7.46 (m, 2 H).  $^{13}\text{C}$  NMR (75 MHz,  $\text{CDCl}_3$ )  $\delta$  24.1 (–), 32.8 (–), 32.9 (–), 34.5 (+), 41.1 (–), 56.2 (+), 60.8 (–), 80.4 (+), 83.6 (–), 91.2 (–), 112.0 (+), 114.4 (+), 119.3 (+), 123.5 (–), 127.9 (+), 128.3 (+), 131.6 (+), 134.0 (–), 147.7 (–), 148.9 (–). HRMS (FAB) calcd for  $\text{C}_{23}\text{H}_{26}\text{O}_3$  ( $\text{M}^+$ ) 350.1882, found 350.1884.

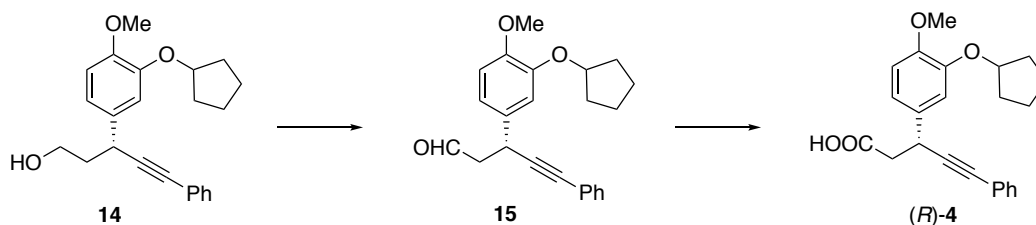

**(*R*)-3-[3-(Cyclopentyloxy)-4-methoxyphenyl]-5-phenylpent-4-ynoic acid (**4**)**

To an ice-cold solution of alcohol **14** (128 mg, 0.366 mmol) in CH<sub>2</sub>Cl<sub>2</sub> (1.5 mL) were added DMSO (0.104 mL, 1.46 mmol), Et<sub>3</sub>N (0.153 mL, 1.10 mmol) and SO<sub>3</sub>·pyridine (117 mg, 0.733 mmol). The mixture was stirred at room temperature for 20 h and diluted with H<sub>2</sub>O and CH<sub>2</sub>Cl<sub>2</sub>. The organic phase was separated, and the aqueous phase was extracted with CH<sub>2</sub>Cl<sub>2</sub> twice. The combined organic layers were washed sequentially with citrate-phosphate buffer (pH = 5.0) and brine, dried over MgSO<sub>4</sub> and concentrated. The residue was passed through a short column of silica gel (hexane/EtOAc) to give aldehyde **15**, which was dissolved in acetone (1.5 mL) for the next reaction. The aldehyde was synthesized again and purified by chromatography on silica gel (hexane/EtOAc). Liquid. *R*<sub>f</sub> = 0.52 (hexane/EtOAc = 2:1). [ $\alpha$ ]<sub>D</sub><sup>24</sup> +1 (*c* 1.02, CHCl<sub>3</sub>). IR (neat) 1724, 1512, 1260 cm<sup>-1</sup>. <sup>1</sup>H NMR (300 MHz, CDCl<sub>3</sub>)  $\delta$  1.46–1.70 (m, 2 H), 1.76–2.04 (m, 6 H), 2.89 (ddd, *J* = 16.8, 6.3, 1.8 Hz, 1 H), 2.98 (ddd, *J* = 16.8, 7.5, 1.8 Hz, 1 H), 3.84 (s, 3 H), 4.37 (dd, *J* = 7.5, 6.3 Hz, 1 H), 4.74–4.84 (m, 1 H), 6.84 (d, *J* = 8.1 Hz, 1 H), 6.94–7.01 (m, 3 H), 7.27–7.34 (m, 3 H), 7.39–7.46 (m, 2 H), 9.86 (t, *J* = 1.8 Hz, 1 H). <sup>13</sup>C NMR (75 MHz, CDCl<sub>3</sub>)  $\delta$  24.1 (–), 32.1 (+), 32.8 (–), 32.9 (–), 51.4 (–), 56.1 (+), 80.4 (+), 84.2 (–), 89.7 (–), 112.1 (+), 114.2 (+), 119.3 (+), 123.1 (–), 128.2 (+), 128.3 (+), 131.7 (+), 132.5 (–), 147.8 (–), 149.2 (–), 200.5 (+).

To the above acetone solution cooled to 0 °C was added Jones reagent (10 drops). After being stirred at 0 °C for 10 min, the mixture was diluted with *i*-PrOH and H<sub>2</sub>O. The product was extracted with EtOAc twice. The combined organic layers were dried over MgSO<sub>4</sub> and concentrated to afford a residue, which was purified by chromatography on silica gel (hexane/EtOAc) to furnish acid (*R*)-**4** (83.1 mg, 62% over two steps). Liquid. *R*<sub>f</sub> = 0.12 (hexane/EtOAc = 3:1). [ $\alpha$ ]<sub>D</sub><sup>24</sup> –7 (*c* 0.97, CHCl<sub>3</sub>). Cf. lit.<sup>S5</sup> [ $\alpha$ ]<sub>D</sub><sup>23</sup> –3.5 (*c* 0.75, CHCl<sub>3</sub>). IR (neat) 3000, 1711, 1515, 1260, 1136 cm<sup>-1</sup>. <sup>1</sup>H NMR (300 MHz, CDCl<sub>3</sub>)  $\delta$  1.42–1.68 (m, 2 H), 1.72–2.01 (m, 6 H), 2.83 (dd, *J* = 15.8, 7.2 Hz, 1 H), 2.95 (dd, *J* = 15.8, 8.4 Hz, 1 H), 3.83 (s, 3 H), 4.31 (t, *J* = 7.3 Hz, 1 H), 4.72–4.84 (m, 1 H), 6.83 (d, *J* = 7.8 Hz, 1 H), 6.94–

7.01 (m, 2 H), 7.24–7.33 (m, 3 H), 7.37–7.46 (m, 2 H).  $^{13}\text{C}$  NMR (75 MHz,  $\text{CDCl}_3$ )  $\delta$  24.1 (–), 32.8 (–), 32.9 (–), 34.1 (+), 43.3 (–), 56.1 (+), 80.4 (+), 83.6 (–), 89.9 (–), 112.1 (+), 114.3 (+), 119.4 (+), 123.3 (–), 128.1 (+), 128.3 (+), 131.7 (+), 132.6 (–), 147.7 (–), 149.2 (–), 176.9 (–). HRMS (FAB) calcd for  $\text{C}_{23}\text{H}_{24}\text{O}_4\text{Na}$   $[(\text{M}+\text{Na})^+]$  387.1572, found 387.1567. The  $^1\text{H}$  NMR spectral data except the undetected  $\text{COOH}$  were consistent with those reported,<sup>S5</sup> while the  $^{13}\text{C}$  NMR spectral data were updated. The  $^{13}\text{C}$ –APT NMR spectrum also supported the structure.

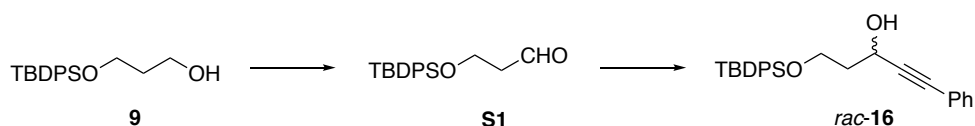

### 5-(*tert*-Butyldiphenylsilyloxy)-1-phenylpent-1-yn-3-ol (*rac*-16)

According to the procedure described above, alcohol **9** (2.99 g, 9.51 mmol) was subjected to oxidation with  $\text{SO}_3 \cdot \text{pyridine}$  (3.03 g, 19.0 mmol), DMSO (2.70 mL, 38.0 mmol) and  $\text{Et}_3\text{N}$  (4.0 mL, 29 mmol) in  $\text{CH}_2\text{Cl}_2$  (20 mL) at room temperature overnight to afford aldehyde **S1**, which was passed through a short column of silica gel (hexane/EtOAc) for the next reaction.

To a solution of phenylacetylene (1.67 mL, 15.2 mmol) in THF (10 mL) was added *n*-BuLi (1.60 M in hexane, 7.73 mL, 12.4 mmol) dropwise at  $-78^\circ\text{C}$ . After 30 min at  $-78^\circ\text{C}$ , the above aldehyde dissolved in THF (10 mL) was added. The solution was stirred at  $-78^\circ\text{C}$  for 1 h and diluted with saturated  $\text{NH}_4\text{Cl}$ . The mixture was extracted with EtOAc twice. The combined organic layers were dried over  $\text{MgSO}_4$  and concentrated to afford a residue, which was purified by chromatography on silica gel (hexane/EtOAc) to give alcohol *rac*-**16** (3.13 g, 80% over two steps). Liquid.  $R_f = 0.13$  (hexane/EtOAc = 19:1). IR (neat) 3410, 1428, 1112, 701  $\text{cm}^{-1}$ .  $^1\text{H}$  NMR (300 MHz,  $\text{CDCl}_3$ )  $\delta$  1.06 (s, 9 H), 1.93–2.07 (m, 1 H), 2.08–2.21 (m, 1 H), 3.49 (d,  $J = 5.1$  Hz, 1 H), 3.89 (ddd,  $J = 10.2, 6.0, 4.2$  Hz, 1 H), 4.13 (ddd,  $J = 10.2, 8.0, 4.2$  Hz, 1 H), 4.88–4.98 (m, 1 H), 7.26–7.47 (m, 11 H), 7.66–7.75 (m, 4 H).  $^{13}\text{C}$  NMR (75 MHz,  $\text{CDCl}_3$ )  $\delta$  19.1 (–), 26.8 (+), 38.8 (–), 62.0 (–), 62.2 (+), 85.1 (–), 89.7 (–), 122.8 (–), 127.9 (+), 128.3 (+), 128.4 (+), 129.88 (+), 129.91 (+), 131.8 (+), 132.9 (–), 135.6 (+). HRMS (FAB) calcd for  $\text{C}_{27}\text{H}_{31}\text{O}_2\text{Si}$   $[(\text{M}+\text{H})^+]$  415.2093, found 415.2088. The  $^1\text{H}$  and  $^{13}\text{C}$  NMR spectral data and their spectra reported in the literature<sup>S4</sup> were updated.

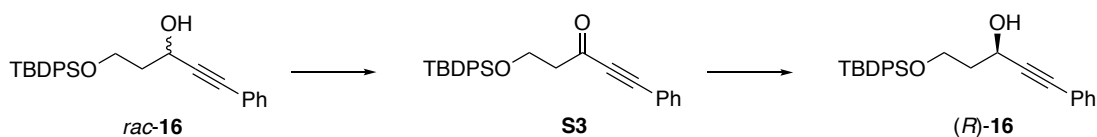

**(R)-5-(tert-Butyldiphenylsilyloxy)-1-phenylpent-1-yn-3-ol [(R)-16]**

To an ice-cold solution of *rac*-**16** (139 mg, 0.335 mmol) in CH<sub>2</sub>Cl<sub>2</sub> (3 mL) were added Celite (220 mg) and PCC (108 mg, 0.503 mmol). The mixture was stirred at room temperature for 26 h, diluted with hexane and filtered through a pad of Celite with hexane. The filtrate was concentrated and the residue was purified by chromatography on silica gel (hexane/EtOAc) to give ketone **S3** (94.6 mg, 68%). Liquid. *R*<sub>f</sub> = 0.63 (hexane/EtOAc = 5:1). IR (neat) 2200, 1674, 1112 cm<sup>-1</sup>. <sup>1</sup>H NMR (300 MHz, CDCl<sub>3</sub>) δ 1.03 (s, 9 H), 2.89 (t, *J* = 6.1 Hz, 2 H), 4.10 (t, *J* = 6.1 Hz, 2 H), 7.29–7.57 (m, 11 H), 7.62–7.74 (m, 4 H). <sup>13</sup>C NMR (75 MHz, CDCl<sub>3</sub>) δ 19.2 (–), 26.8 (+), 48.3 (–), 59.5 (–), 87.9 (–), 91.2 (–), 120.0 (–), 127.8 (+), 128.6 (+), 129.8 (+), 130.8 (+), 133.1 (+), 133.4 (–), 135.6 (+), 186.4 (–). The <sup>1</sup>H NMR spectrum was coincident with those reported, while the <sup>13</sup>C NMR spectral data and spectrum were updated.<sup>S4</sup>

A mixture of RuCl[(*R,R*)-TsDPEN](*p*-cymene) (31.3 mg, 0.049 mmol) and KOH (ca. 9 mg, 0.16 mmol) in CH<sub>2</sub>Cl<sub>2</sub> (1 mL) was stirred at room temperature for 5 min, and washed with H<sub>2</sub>O twice. The organic layer was transferred to another flask, dried over CaH<sub>2</sub> and concentrated to afford a residue, which was diluted with *i*-PrOH (6 mL) for the next reaction. To an ice-cold solution of the above ketone (338 mg, 0.819 mmol) in *i*-PrOH (1 mL) was added the above *i*-PrOH solution. The mixture was stirred at 30 °C for 21 h, and diluted with H<sub>2</sub>O and saturated NaHCO<sub>3</sub>. The mixture was extracted with EtOAc twice. The combined organic layers were dried over MgSO<sub>4</sub> and concentrated to afford a residue, which was passed through a short column of silica gel (hexane/EtOAc) to give alcohol (*R*)-**16** (286 mg, 84%). [ $\alpha$ ]<sub>D</sub><sup>23</sup> –11 (*c* 0.524, CHCl<sub>3</sub>). The <sup>1</sup>H and <sup>13</sup>C NMR spectra were identical with those for the racemic alcohol *rac*-**16**.

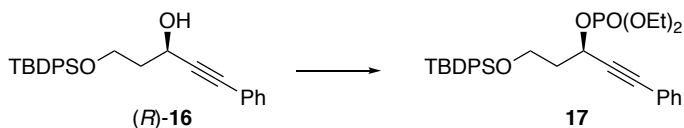

**(R)-5-(tert-Butyldiphenylsilyloxy)-1-phenylpent-1-yn-3-yl diethyl phosphate (17)**

To a solution of (*R*)-**16** (280 mg, 0.675 mmol) in CH<sub>2</sub>Cl<sub>2</sub> (2.7 mL) were added *N*-methylimidazole (0.138 mL, 1.75 mmol) and diethyl chlorophosphate (0.243 mL, 1.69 mmol). The solution was stirred at room temperature for 4 h and diluted with 1 N HCl. The mixture was extracted with CH<sub>2</sub>Cl<sub>2</sub> twice. The combined organic layers were washed with NaHCO<sub>3</sub> and brine, dried over MgSO<sub>4</sub> and concentrated to afford a residue, which was purified by chromatography on silica gel (hexane/EtOAc) to give phosphate **17** (347 mg, 93%). Liquid. *R*<sub>f</sub> = 0.14 (hexane/EtOAc = 5:1). [ $\alpha$ ]<sub>D</sub><sup>24</sup> +33 (*c* 0.56, CHCl<sub>3</sub>). IR (neat) 1276, 1112, 1033, 997, 703 cm<sup>-1</sup>. <sup>1</sup>H NMR (300 MHz, CDCl<sub>3</sub>)  $\delta$  1.06 (s, 9 H), 1.28–1.36 (m, 6 H), 2.03–2.18 (m, 1 H), 2.20–2.34 (m, 1 H), 3.88 (t, *J* = 6.2 Hz, 2 H), 4.03–4.23 (m, 4 H), 5.49 (q, *J* = 7.0 Hz, 1 H), 7.27–7.45 (m, 11 H), 7.62–7.72 (m, 4 H). <sup>13</sup>C NMR (75 MHz, CDCl<sub>3</sub>)  $\delta$  16.1 (d, *J* = 7 Hz) (+), 19.1 (–), 26.7 (+), 39.5 (d, *J* = 7 Hz) (–), 59.6 (–), 63.7 (d, *J* = 6 Hz) (–), 63.8 (d, *J* = 6 Hz) (–), 66.0 (d, *J* = 6 Hz) (+), 86.1 (d, *J* = 3 Hz) (–), 86.8 (–), 122.0 (–), 127.64 (+), 127.65 (+), 128.2 (+), 128.7 (+), 129.60 (+), 129.63 (+), 131.7 (+), 133.4 (–), 135.5 (+). HRMS (FAB) calcd for C<sub>31</sub>H<sub>40</sub>O<sub>5</sub>PSi [(M+H)<sup>+</sup>] 551.2383, found 551.2376.

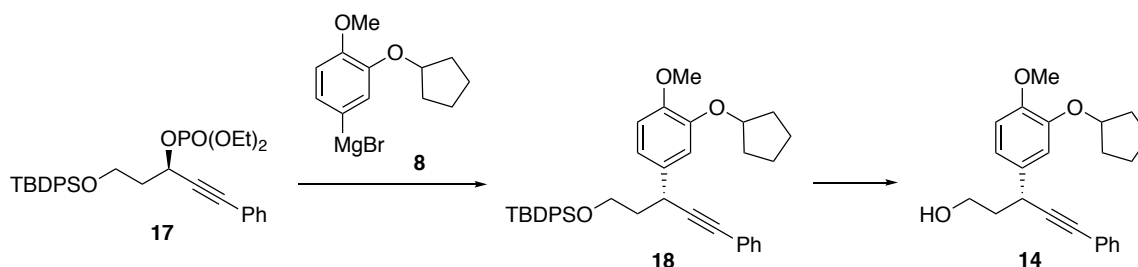

**(*R*)-tert-Butyl[3-[3-(cyclopentyloxy)-4-methoxyphenyl]-5-phenylpent-4-ynyloxy]diphenylsilane (**14**)**

The Grignard reagent **8** (0.90 M in THF) was prepared by the method described above, and a part of the solution (0.77 mL, 0.69 mmol) was added to an ice-cold solution of CuCN (6.2 mg, 0.069 mmol) in THF (1.4 mL) and DME (1.4 mL). The solution was stirred at 0 °C for 30 min, and phosphate **17** (190 mg, 0.345 mmol) in THF (5 mL) was added dropwise. The mixture was stirred at 0 °C for 1.5 h and diluted with saturated NH<sub>4</sub>Cl and EtOAc with vigorous stirring. The organic phase was separated, and the aqueous phase was extracted with EtOAc twice. The combined organic layers were dried over MgSO<sub>4</sub> and concentrated to afford a residue, which was passed through a short column of silica gel (hexane/EtOAc) to afford acetylene **18**, which was dissolved in THF (3.5 mL) for the next reaction. The



product was synthesized again and purified by chromatography on silica gel (hexane/EtOAc). Liquid.  $R_f = 0.65$  (hexane/EtOAc = 5:1).  $[\alpha]_D^{24} +17$  ( $c$  1.17,  $\text{CHCl}_3$ ). IR (neat) 1513, 1427, 1260, 1112, 702  $\text{cm}^{-1}$ .  $^1\text{H}$  NMR (300 MHz,  $\text{CDCl}_3$ )  $\delta$  1.09 (s, 9 H), 1.50–1.66 (m, 2 H), 1.74–1.97 (m, 6 H), 1.99–2.10 (m, 2 H), 3.76 (dt,  $J = 10.2, 5.7$  Hz, 1 H), 3.84 (s, 3 H), 3.87–3.99 (m, 1 H), 4.14 (t,  $J = 7.5$  Hz, 1 H), 4.73–4.82 (m, 1 H), 6.82 (d,  $J = 8.4$  Hz, 1 H), 6.91–7.01 (m, 3 H), 7.25–7.44 (m, 11 H), 7.64–7.74 (m, 4 H).  $^{13}\text{C}$  NMR (75 MHz,  $\text{CDCl}_3$ )  $\delta$  19.3 (–), 24.1 (–), 26.9 (+), 32.8 (–), 32.9 (–), 34.1 (+), 41.5 (–), 56.2 (+), 61.4 (–), 80.4 (+), 83.2 (–), 91.7 (–), 112.0 (+), 114.5 (+), 119.5 (+), 123.8 (–), 127.7 (+), 128.2 (+), 129.6 (+), 131.7 (+), 133.8 (–), 133.9 (–), 134.3 (–), 135.59 (+), 135.65 (+), 147.6 (–), 148.8 (–).

To the above THF solution cooled to 0 °C were added TBAF (1.0 M in THF, 1.04 mL, 1.04 mmol) and AcOH (0.059 mL, 1.0 mmol). The solution was stirred at room temperature for 18 h and diluted with saturated  $\text{NH}_4\text{Cl}$ . The product was extracted with EtOAc twice, and the combined organic layers were washed with brine, dried over  $\text{MgSO}_4$  and concentrated. The residue was purified by chromatography on silica gel (hexane/EtOAc) to give alcohol **14** (104 mg, 86% over two steps). 95.6% ee by HPLC analysis (Chiralcel OJ-H, hexane/*i*-PrOH = 90:10, 0.5 mL/min, 25 °C,  $t_R = 28.1$  and 33.4 min for (*S*)-isomer (minor) and (*R*)-isomer (major), respectively). The  $^1\text{H}$  NMR spectral data of **14** were identical with those synthesized from acetylene **13** by the Sonogashira coupling reaction (vide supra).

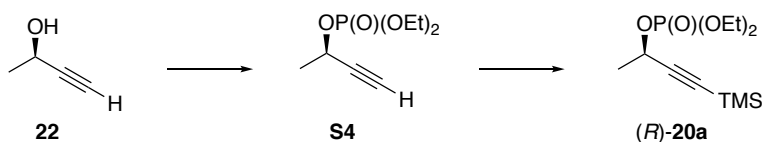

#### (*R*)-Diethyl 4-(trimethylsilyl)but-3-yn-2-yl phosphate [(*R*)-20a]

To an ice-cold mixture of alcohol **22** (98.2% ee,  $S_6, S_7$  503 mg, 7.18 mmol) and *N*-methylimidazole (1.22 mL, 14.3 mmol) in  $\text{CH}_2\text{Cl}_2$  (20 mL) was added diethyl chlorophosphate (1.53 mL, 10.7 mmol). The mixture was stirred at room temperature for 3 h and poured to brine. The product was extracted with  $\text{CH}_2\text{Cl}_2$  twice. The combined organic layers were washed with brine, dried over  $\text{MgSO}_4$  and concentrated to afford a residual oil, which was purified by chromatography on silica gel (hexane/EtOAc) to obtain phosphate **S4** (1.42 g, 96%). Pale yellow liquid.  $^1\text{H}$  NMR (300 MHz,  $\text{CDCl}_3$ )  $\delta$  1.35 (tm,  $J = 7.2$  Hz, 6

H), 1.60 (d,  $J = 6.6$  Hz, 3 H), 2.56 (d,  $J = 2.4$  Hz, 1 H), 4.06–4.22 (m, 4 H), 5.04–5.16 (m, 1 H).  $^{13}\text{C}$  NMR (75 MHz,  $\text{CDCl}_3$ )  $\delta$  16.1 (d,  $J = 7$  Hz) (+), 23.3 (d,  $J = 6$  Hz) (+), 63.9 (d,  $J = 5$  Hz) (+), 64.0 (d,  $J = 6$  Hz) (–), 74.0 (–), 81.9 (d,  $J = 5$  Hz) (–). The spectral data were in agreement with those reported.<sup>S8</sup>

To a solution of the above phosphate (1.00 g, 4.85 mmol) in THF (50 mL) was added  $\text{NaN}(\text{TMS})_2$  (1.0 M in THF, 6.30 mL, 6.30 mmol) dropwise at  $-78$  °C. After 30 min, a solution of  $\text{TMSCl}$  (0.86 mL, 6.8 mmol) in THF (10 mL) was added. The solution was stirred at  $-78$  °C for 2 h and poured to saturated  $\text{NH}_4\text{Cl}$ . The resulting mixture was extracted with EtOAc twice. The combined organic layers were washed with brine, dried over  $\text{MgSO}_4$  and concentrated to afford a residual oil, which was purified by chromatography on silica gel (hexane/EtOAc) to afford TMS phosphate (*R*)-**20a** (1.19 g, 88%). Liquid.  $^1\text{H}$  NMR (300 MHz,  $\text{CDCl}_3$ )  $\delta$  0.17 (s, 9 H), 1.346 (dt,  $J = 1.0, 7.0$  Hz, 3 H), 1.355 (dt,  $J = 1.0, 7.0$  Hz, 3 H), 1.56 (d,  $J = 6.6$  Hz, 3 H), 4.06–4.22 (m, 4 H), 5.09 (dq,  $J = 7.8, 6.6$  Hz, 1 H).  $^{13}\text{C}$  NMR (75 MHz,  $\text{CDCl}_3$ )  $\delta$   $-0.3$  (+), 16.1 (d,  $J = 7$  Hz) (+), 23.4 (d,  $J = 6$  Hz) (+), 63.8 (d,  $J = 6$  Hz) (–), 63.9 (d,  $J = 7$  Hz) (–), 64.6 (d,  $J = 5$  Hz) (+), 90.6 (–), 103.4 (d,  $J = 5$  Hz) (–). The spectra were consistent with those reported.<sup>S9</sup>

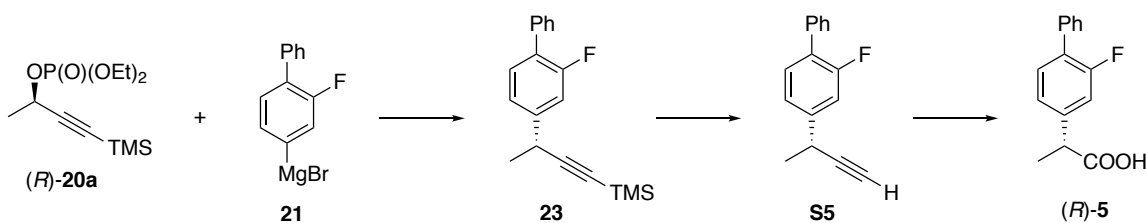

### (*R*)-Flurbiprofen [(*R*)-5]

To an ice-cold solution of  $\text{CuBr} \cdot \text{Me}_2\text{S}$  (14.9 mg, 0.0725 mmol) in THF (1 mL) and DME (1 mL) was added the Grignard reagent **21** (0.90 M in THF, 0.82 mL, 0.74 mmol) dropwise. The resulting mixture was stirred at  $0$  °C for 30 min and phosphate (*R*)-**20a** (80.3 mg, 0.288 mmol) in THF (4 mL) was added dropwise. The mixture was stirred at  $0$  °C for 1 h and diluted with saturated  $\text{NH}_4\text{Cl}$ . The resulting mixture was extracted with EtOAc twice. The combined extracts were dried over  $\text{MgSO}_4$  and concentrated to afford an oil, which was purified by chromatography on silica gel (hexane/EtOAc) to afford alkyne **23** (75.4 mg, 88%). Liquid.  $R_f = 0.55$  (hexane/EtOAc = 10:1). 98.1% ee by HPLC (Chiralcel OD-H, hexane/*i*-PrOH = 99.9:0.1, 0.3 mL/min,  $25$  °C,  $t_R = 29.9$  and 39.1 min for (*R*)-isomer

(major) and (*S*)-isomer (minor), respectively).  $[\alpha]_{\text{D}}^{23} -2$  (*c* 1.51,  $\text{CHCl}_3$ ).  $^1\text{H}$  NMR (300 MHz,  $\text{CDCl}_3$ )  $\delta$  0.20 (s, 9 H), 1.51 (d,  $J = 7.2$  Hz, 3 H), 3.81 (q,  $J = 7.2$  Hz, 1 H), 7.17–7.57 (m, 8 H).  $^{13}\text{C}$  NMR (75 MHz,  $\text{CDCl}_3$ )  $\delta$  0.2 (+), 24.4 (+), 32.4 (+), 86.9 (–), 108.6 (–), 114.7 (d,  $J = 24$  Hz) (+), 122.9 (d,  $J = 3$  Hz) (+), 127.3 (d,  $J = 14$  Hz) (–), 127.6 (+), 128.5 (+), 129.0 (d,  $J = 3$  Hz) (+), 130.8 (d,  $J = 4$  Hz) (+), 135.7 (–), 144.7 (d,  $J = 7$  Hz) (–), 159.8 (d,  $J = 246$  Hz) (–).  $^{19}\text{F}$  NMR (376 MHz,  $\text{CDCl}_3$ )  $\delta$  119.0 (s).

To a solution of the above alkyne in MeOH (2 mL) was added  $\text{K}_2\text{CO}_3$  (53.3 mg, 0.386 mmol). The mixture was stirred at room temperature for 4 h, diluted with  $\text{Et}_2\text{O}$  and filtered through a pad of Celite. The filtrate was concentrated to afford an oil, which was purified by chromatography on silica gel (hexane/ $\text{EtOAc}$ ) to afford acetylene **S5** (41.8 mg, 73%). Liquid.  $R_f = 0.45$  (hexane/ $\text{EtOAc} = 10:1$ ).

To an ice-cold solution of the above acetylene in MeCN (1 mL),  $\text{CCl}_4$  (1 mL) and  $\text{H}_2\text{O}$  (0.3 mL) were added  $\text{RuCl}_3 \cdot n\text{H}_2\text{O}$  (ca. 2 mg) and  $\text{NaIO}_4$  (106 mg, 0.496 mmol). The mixture was stirred at room temperature for 90 min, diluted with  $\text{Et}_2\text{O}$  and filtered through a pad of Celite. The filtrate was concentrated to afford an oil, which was purified by chromatography on silica gel (hexane/ $\text{EtOAc}$ ) to afford (*R*)-**5** (30.0 mg, 66%).  $[\alpha]_{\text{D}}^{25} -37$  (*c* 0.60,  $\text{CHCl}_3$ ). Cf. lit.  $[\alpha]_{\text{D}}^{20} -29.5$  (*c* 1.10,  $\text{CHCl}_3$ ) for (*R*)-isomer of 90% ee (calcd  $[\alpha]_{\text{D}} -32.8$  for 100% ee);<sup>S10a</sup>  $[\alpha]_{\text{D}}^{31} -44.0$  (*c* 1.00,  $\text{CHCl}_3$ ) for (*R*)-isomer of 97% ee;<sup>S10b</sup>  $[\alpha]_{\text{D}}^{22} +33.5$  (*c* 1.0,  $\text{CHCl}_3$ ) for (*S*)-isomer of 85% ee (calcd  $[\alpha]_{\text{D}} +39.4$  for 100% ee).<sup>S10c</sup>  $^1\text{H}$  NMR (300 MHz,  $\text{CDCl}_3$ )  $\delta$  1.56 (d,  $J = 7.2$  Hz, 3 H), 3.79 (q,  $J = 7.2$  Hz, 1 H), 7.12–7.20 (m, 2 H), 7.33–7.48 (m, 4 H), 7.50–7.56 (m, 2 H).  $^{13}\text{C}$  NMR (75 MHz,  $\text{CDCl}_3$ )  $\delta$  18.1 (+), 44.9 (+), 115.5 (d,  $J = 24$  Hz) (+), 123.8 (d,  $J = 3$  Hz) (+), 127.8 (+), 128.2 (d,  $J = 13$  Hz) (–), 128.5 (+), 129.0 (d,  $J = 3$  Hz) (+), 131.0 (d,  $J = 4$  Hz) (+), 135.5 (–), 141.0 (d,  $J = 8$  Hz) (–), 159.8 (d,  $J = 247$  Hz) (–), 180.1 (–). The  $^1\text{H}$  NMR spectrum except the undetected  $\text{COOH}$  and the  $^{13}\text{C}$  NMR spectrum were consistent with those reported.<sup>S10c,S11a–f</sup> The  $^{13}\text{C}$ -APT spectrum was coincident with that reported.<sup>S11d</sup>

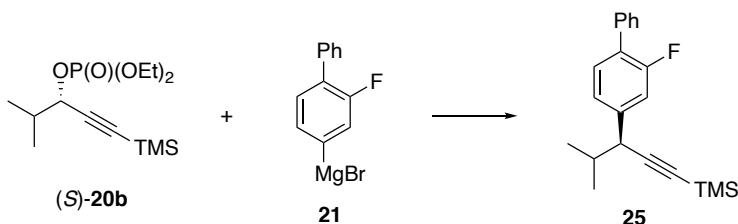

**(S)-[3-(2-Fluoro-[1,1'-biphenyl]-4-yl)-4-methylpent-1-yn-1-yl]trimethylsilane (**25**)**

To an ice-cold solution of CuBr·Me<sub>2</sub>S (7.9 mg, 0.038 mmol) in THF (0.5 mL) and DME (0.5 mL) was added the Grignard reagent **21** (0.90 M in THF, 0.41 mL, 0.37 mmol) dropwise. The solution was stirred at 0 °C for 1 h and phosphate (*S*)-**20b**<sup>S12</sup> (96.6% ee, 46.0 mg, 0.150 mmol) in THF (2 mL) was added dropwise. After 1 h at 0 °C, the reaction was quenched by addition of saturated NH<sub>4</sub>Cl. The resulting mixture was extracted with EtOAc twice. The combined extracts were dried over MgSO<sub>4</sub> and concentrated to afford an oil, which was purified by chromatography on silica gel (hexane/EtOAc) to afford alkyne **25** (40.5 mg, 83%). Liquid. *R*<sub>f</sub> = 0.83 (hexane/EtOAc = 3:1). 96.8% ee by HPLC (Chiralcel OD-H, hexane/*i*-PrOH = 99.9:0.1, 0.3 mL/min, 25 °C, *t*<sub>R</sub> = 22.6 and 27.1 min for (*R*)-isomer (minor) and (*S*)-isomer (major), respectively). [ $\alpha$ ]<sub>D</sub><sup>25</sup> +6 (*c* 0.81, CHCl<sub>3</sub>). <sup>1</sup>H NMR (300 MHz, CDCl<sub>3</sub>)  $\delta$  0.21 (s, 9 H), 0.94 (d, *J* = 6.8 Hz, 3 H), 1.02 (d, *J* = 6.8 Hz, 3 H), 1.93–2.06 (m, 1 H), 3.58 (d, *J* = 5.7 Hz, 1 H), 7.15 (d, *J* = 10.5 Hz, 2 H), 7.31–7.48 (m, 4 H), 7.52–7.58 (m, 2 H). <sup>13</sup>C NMR (75 MHz, CDCl<sub>3</sub>)  $\delta$  0.2 (+), 18.4 (+), 21.2 (+), 35.0 (+), 45.6 (+), 89.0 (–), 106.1 (–), 115.9 (d, *J* = 23 Hz) (+), 124.2 (d, *J* = 3 Hz) (+), 127.2 (d, *J* = 14 Hz) (–), 127.6 (+), 128.5 (+), 129.0 (d, *J* = 3 Hz) (+), 130.4 (d, *J* = 4 Hz) (+), 135.8 (–), 142.4 (d, *J* = 7 Hz) (–), 159.6 (d, *J* = 246 Hz) (–). <sup>19</sup>F NMR (376 MHz, CDCl<sub>3</sub>)  $\delta$  119.5 (s). HRMS (FD) calcd for C<sub>21</sub>H<sub>25</sub>FSi [M<sup>+</sup>] 324.17095, found 324.17018.

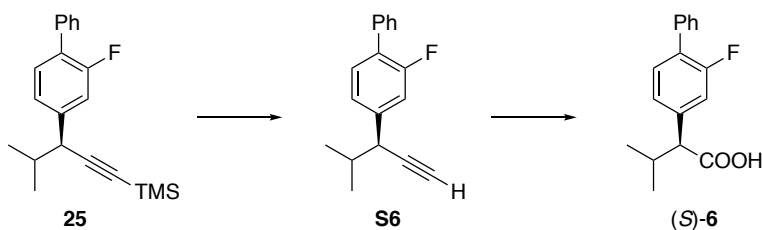

**(S)-2-(2-Fluoro-[1,1'-biphenyl]-4-yl)-3-methylbutanoic acid [(S)-6]**

A mixture of alkyne **25** (40.1 mg, 0.124 mmol) and K<sub>2</sub>CO<sub>3</sub> (24.4 mg, 0.177 mmol) in MeOH (1 mL) was stirred at room temperature for 3 h, diluted with Et<sub>2</sub>O and filtered through a pad of Celite. The filtrate was concentrated to afford an oil, which was purified by chromatography on silica gel (hexane/EtOAc) to afford acetylene **S6** (29.3 mg, 94%). Liquid. *R*<sub>f</sub> = 0.63 (hexane/EtOAc = 20:1) (cf. **25**, *R*<sub>f</sub> = 0.76).

To an ice-cold solution of the above acetylene in MeCN (0.7 mL), CCl<sub>4</sub> (0.7 mL) and H<sub>2</sub>O (0.25 mL) were added RuCl<sub>3</sub>·*n*H<sub>2</sub>O (ca. 1 mg) and NaIO<sub>4</sub> (66.9 mg, 0.313 mmol). The

mixture was stirred at room temperature for 1.5 h, diluted with Et<sub>2</sub>O and filtered through a pad of Celite. The filtrate was concentrated to afford an oil, which was purified by chromatography on silica gel (hexane/EtOAc) to afford acid (*S*)-**6** (17.1 mg, 51% from **25**). Solids. Mp 158–160 °C. *R*<sub>f</sub> = 0.12 (hexane/EtOAc = 3:1). [ $\alpha$ ]<sub>D</sub><sup>20</sup> +38 (*c* 0.266, CHCl<sub>3</sub>). <sup>1</sup>H NMR (400 MHz, CDCl<sub>3</sub>)  $\delta$  0.79 (d, *J* = 6.8 Hz, 3 H), 1.11 (d, *J* = 6.8 Hz, 3 H), 2.26–2.42 (m, 1 H), 3.21 (d, *J* = 10.4 Hz, 1 H), 7.15–7.21 (m, 2 H), 7.33–7.47 (m, 4 H), 7.50–7.56 (m, 2 H). <sup>13</sup>C NMR (100 MHz, CDCl<sub>3</sub>)  $\delta$  20.2 (+), 21.5 (+), 31.9 (+), 59.3 (+), 116.2 (d, *J* = 24 Hz) (+), 124.8 (+), 127.8 (+), 128.3 (d, *J* = 13 Hz) (–), 128.5 (+), 129.0 (+), 130.8 (d, *J* = 3 Hz) (+), 135.5 (–), 139.1 (d, *J* = 8 Hz) (–), 159.7 (d, *J* = 248 Hz) (–), 178.6 (–). HRMS (FD) calcd for C<sub>17</sub>H<sub>17</sub>FO<sub>2</sub> (M<sup>+</sup>) 272.12126, found 272.12146. The carboxylic proton (COOH) was not observed in the <sup>1</sup>H NMR spectrum.

### 3. Synthesis of the precursor of the Grignard reagent **8**

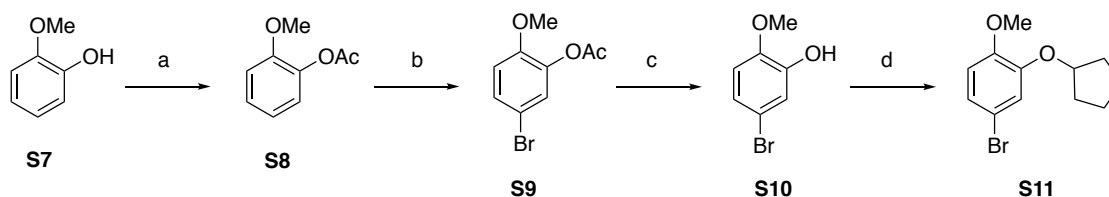

The following synthesis of the precursor **S11** of the reagent **8** was carried out according to the published procedure<sup>S13</sup> with modification to step a. The spectral data were identical with the reported data.<sup>S13</sup> Conversion of **S11** to the Grignard reagent **8** was described in the propargylic substitution mentioned above.

#### 4-Bromo-2-(cyclopentyloxy)-1-methoxybenzene (**S11**)

Step a. A solution of the commercially available alcohol **S7** (5.02 g, 40.4 mmol) and Ac<sub>2</sub>O (5.68 mL, 60.4 mmol) in pyridine (9.7 mL, 120 mmol) was stirred at room temperature for 18 h and diluted with saturated NaHCO<sub>3</sub> with vigorous stirring. The mixture was extracted with EtOAc three times. The combined organic layers were washed successively with 1 N HCl and brine, dried over MgSO<sub>4</sub> and concentrated to afford a residue, which was purified by chromatography on silica gel (hexane/EtOAc) to give acetate **S8** (6.69 g, 100%). Liquid.

$R_f = 0.37$  (hexane/EtOAc = 5:1).  $^1\text{H}$  NMR (300 MHz,  $\text{CDCl}_3$ )  $\delta$  2.32 (s, 3 H), 3.83 (s, 3 H), 6.91–7.00 (m, 2 H), 7.04 (dd,  $J = 8.0, 2.0$  Hz, 1 H), 7.21 (ddd,  $J = 8.4, 7.2, 1.8$  Hz, 1 H).

Step b. A solution of **S8** (1.08 g, 6.50 mmol) and NBS (1.27 g, 7.14 mmol) in MeCN (13 mL) was heated at 60 °C overnight under nitrogen, cooled to room temperature and diluted with  $\text{Na}_2\text{SO}_3$  solution. The product was extracted with EtOAc twice. The combined organic extracts were washed with brine, dried over  $\text{MgSO}_4$  and concentrated to give a residue, which was purified by column chromatography on silica gel (hexane/EtOAc) to afford bromide **S9** (1.54 g, 97%). Liquid.  $R_f = 0.37$  (hexane/EtOAc = 5:1).  $^1\text{H}$  NMR (300 MHz,  $\text{CDCl}_3$ )  $\delta$  2.31 (s, 3 H), 3.82 (s, 3 H), 6.84 (d,  $J = 8.8$  Hz, 1 H), 7.19 (d,  $J = 2.5$  Hz, 1 H), 7.31 (dd,  $J = 8.8, 2.5$  Hz, 1 H).

Step c. A mixture of acetate **S9** (1.54 g, 6.28 mmol) and  $\text{NaHCO}_3$  (789 mg, 9.39 mmol) in MeOH (6 mL) and  $\text{H}_2\text{O}$  (8 mL) was heated for 4 h under reflux, cooled to room temperature and extracted with EtOAc several times. The combined organic extracts were washed with brine and concentrated to give crude phenol **S10** (1.27 g), which was used for the next reaction without further purification. Liquid.  $R_f = 0.26$  (hexane/EtOAc = 5:1).  $^1\text{H}$  NMR (300 MHz,  $\text{CDCl}_3$ )  $\delta$  3.87 (s, 3 H), 5.65 (s, 1 H), 6.71 (d,  $J = 8.4$  Hz, 1 H), 6.96 (dd,  $J = 8.4, 2.4$  Hz, 1 H), 7.06 (d,  $J = 2.4$  Hz, 1 H).

Step d. A mixture of the above phenol, cyclopentyl bromide (1.01 mL, 9.42 mmol) and  $\text{K}_2\text{CO}_3$  (1.73 g, 12.5 mmol) in DMF (25 mL) was heated to 50 °C for 14 h with vigorous stirring, cooled to room temperature and diluted with brine. The product was extracted with EtOAc twice. The combined organic extracts were washed with brine, dried over  $\text{MgSO}_4$  and concentrated to give a residue, which was purified by column chromatography on silica gel (hexane/EtOAc) to afford ether **S11** (1.62 g, 95% over two steps). Liquid.  $R_f = 0.57$  (hexane/EtOAc = 5:1).  $^1\text{H}$  NMR (300 MHz,  $\text{CDCl}_3$ )  $\delta$  1.52–1.69 (m, 2 H), 1.75–2.02 (m, 6 H), 3.82 (s, 3 H), 4.70–4.77 (m, 1 H), 6.73 (d,  $J = 8.4$  Hz, 1 H), 6.96–7.02 (m, 2 H).

## 4. References

- S1 N. Ogawa, T. Amano and Y. Kobayashi, *Synlett*, 2021, **32**, 295.
- S2 (a) L. Ferri , L. Boulard, F. Pradaux, S. Bouzbouz, S. Reymond, P. Capdevielle and J. Cossy, *J. Org. Chem.*, 2008, **73**, 1864; (b) A. B. Holmes, A. B. Hughes and A. L. Smith, *J. Chem. Soc., Perkin Trans. 1*, 1993, 633.
- S3 S. Raghavan and P. K. Samanta, *Synlett*, 2013 **24**, 1983.
- S4 R. A. Bauer, C. M. DiBlasi and D. S. Tan, *Org. Lett.*, 2010, **12**, 2084.
- S5 A. J. Oelke, J. Sun and G. C. Fu, *J. Am. Chem. Soc.*, 2012, **134**, 2966.
- S6 This alcohol used herein was previously prepared with 98.2% ee. See ref. S7, the Supporting Information, pages S6 and S24.
- S7 H. Kawashima, N. Ogawa, R. Saeki and Y. Kobayashi, *Chem. Commun.*, 2016, **52**, 4918.
- S8 Y. Imada, M. Yuasa, I. Nakamura and S. Murahashi, *J. Org. Chem.*, 1994, **59**, 2282.
- S9 (a) Ref. S7, page S6; (b) C. F. Bender, C. L. Paradise, V. M. Lynch, F. K. Yoshimoto and J. F. De Brabander, *Tetrahedron*, 2018, **74**, 909.
- S10 (a) K. Dong, Y. Li, Z. Wang and K. Ding, *Org. Chem. Front.*, 2014, **1**, 155; (b) S.-F. Zhu, Y.-B. Yu, S. Li, L.-X. Wang and Q.-L. Zhou, *Angew. Chem. Int. Ed.*, 2012, **51**, 8872; (c) C. E. Stivala and A. Zakarian, *J. Am. Chem. Soc.*, 2011, **133**, 11936.
- S11 (a) H. Zhong, M. Shevlin and P. J. Chirik, *J. Am. Chem. Soc.*, 2020, **142**, 5272; (b) B. Li, T. Li, M. A. Aliyu, Z. H. Li and W. Tang, *Angew. Chem. Int. Ed.*, 2019, **58**, 11355; (c) L. Huang, L. K. Ackerman, K. Kang, A. M. Parsons and D. J. Weix, *J. Am. Chem. Soc.*, 2019, **141**, 10978; (d) G. J. Harkness and M. L. Clarke, *Eur. J. Org. Chem.*, 2017, 4859; (e) R. Shang, D.-S. Ji, L. Chu, Y. Fu and L. Liu, *Angew. Chem. Int. Ed.*, 2011, **50**, 4470; (f) I. Shiina, K. Nakata, K. Ono, Y. Onda, M. Itagaki, *J. Am. Chem. Soc.*, 2010, **132**, 11629.
- S12 This phosphate was previously prepared with 96.6% ee in: Y. Kobayashi, Y. Takashima, Y. Motoyama, Y. Isogawa, K. Katagiri, A. Tsuboi and N. Ogawa, *Chem. Eur. J.*, 2021, **27**, 3779 (the Supporting Information, pages S8–S9 and S47).
- S13 A. S. Paraskar and A. Sudalai, *Tetrahedron*, 2006, **62**, 4907.

**5. Calculation of ratios  
by  $^1\text{H}$  NMR spectroscopy and HPLC analysis**



Enantiomeric excess of (*R*)-7

Chiralcel OD-H; hexane/*i*-PrOH 99.9:0.1; flow 0.3 mL/min; temp. 25 °C

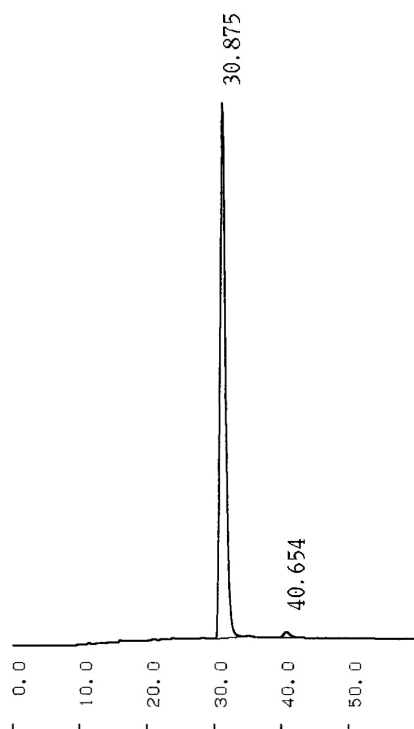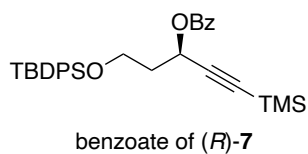

$$\begin{aligned} & \% ee \\ &= (98.7696 - 1.2304) \times 100 / (98.7696 + 1.2304) \\ &= 97.539 \\ &\approx 97.5 \end{aligned}$$

| ** CALCULATION REPORT ** |      |        |         |        |    |      |         |
|--------------------------|------|--------|---------|--------|----|------|---------|
| CH                       | PKNO | TIME   | AREA    | HEIGHT | MK | IDNO | CONC    |
| 1                        | 5    | 30.875 | 4521100 | 80422  |    |      | 98.7696 |
|                          | 7    | 40.654 | 56319   | 857    |    |      | 1.2304  |
| TOTAL                    |      |        | 4577420 | 81279  |    |      | 100     |

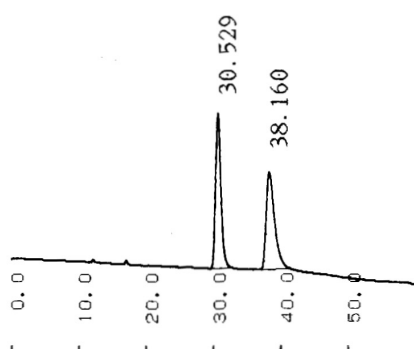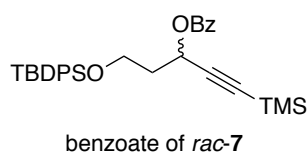

| ** CALCULATION REPORT ** |      |        |         |        |    |           |
|--------------------------|------|--------|---------|--------|----|-----------|
| CH                       | PKNO | TIME   | AREA    | HEIGHT | MK | IDNO CONC |
| 1                        | 4    | 30.529 | 588226  | 10606  | V  | 50.2987   |
|                          | 5    | 38.16  | 581239  | 6623   |    | 49.7013   |
| TOTAL                    |      |        | 1169465 | 17229  |    | 100       |

## Regioselectivity producing acetylene **11** over allene **12**

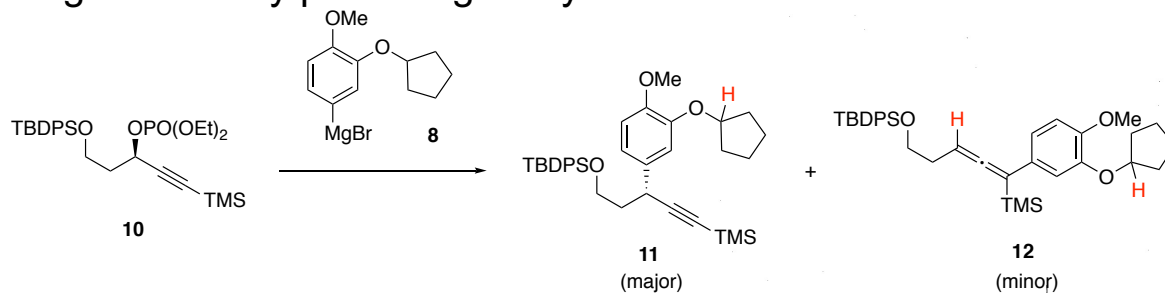

Purified products

$^1\text{H}$  NMR (300 MHz,  $\text{CDCl}_3$ )

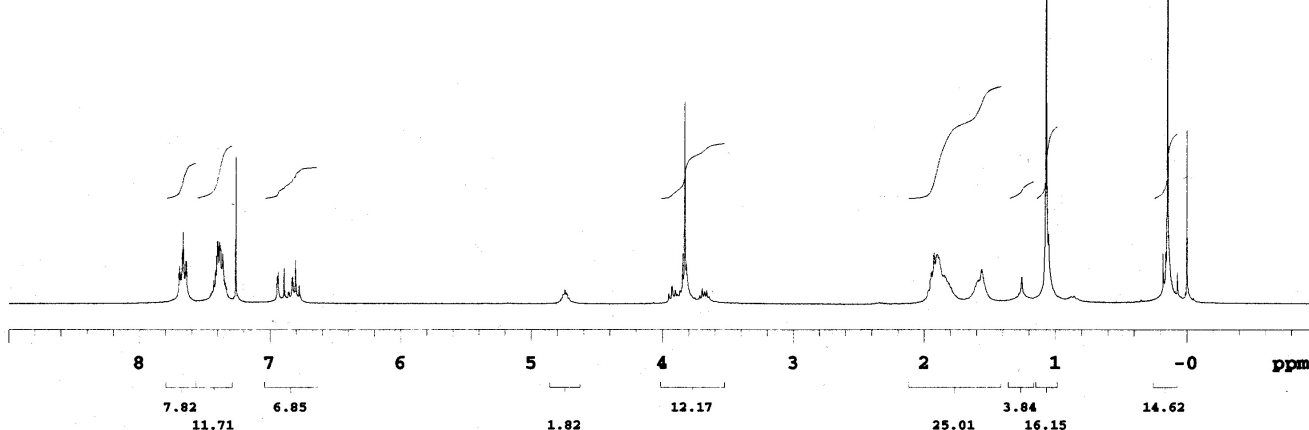

Expansion of the above NMR spectrum

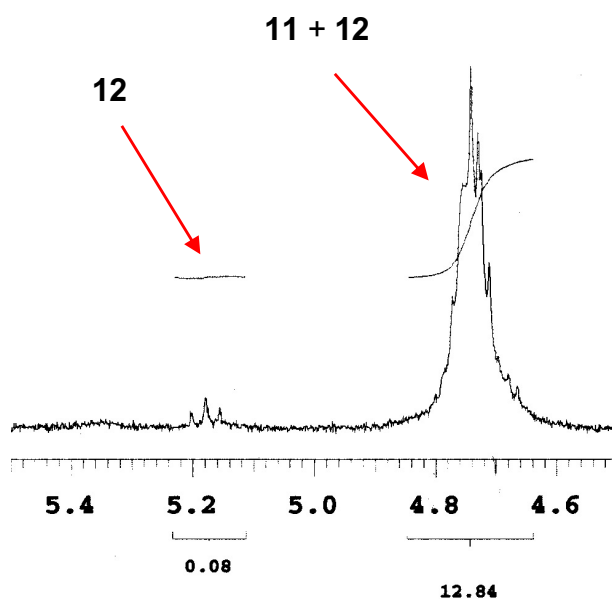

regioselectivity giving **11** (%)

$$= (12.84 - 0.08) \times 100 / 12.84$$

$$= 99.377$$

$$\approx 99$$

Cf. the  $^1\text{H}$  NMR spectrum of the crude substitution products

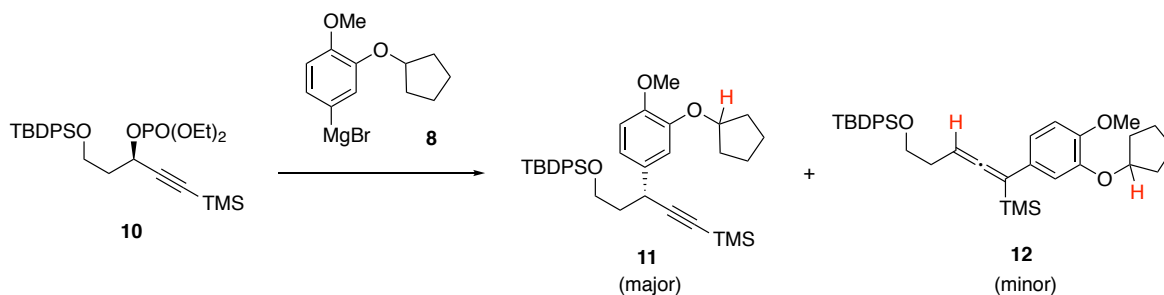

The crude products

$^1\text{H}$  NMR (300 MHz,  $\text{CDCl}_3$ )

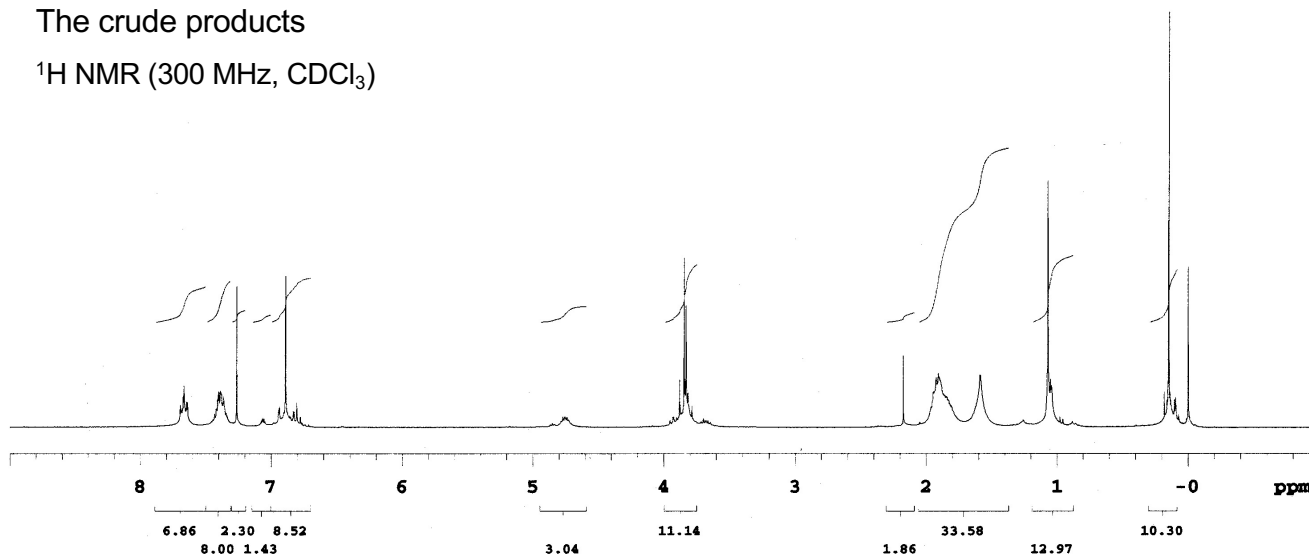

Expansion of the above NMR spectrum

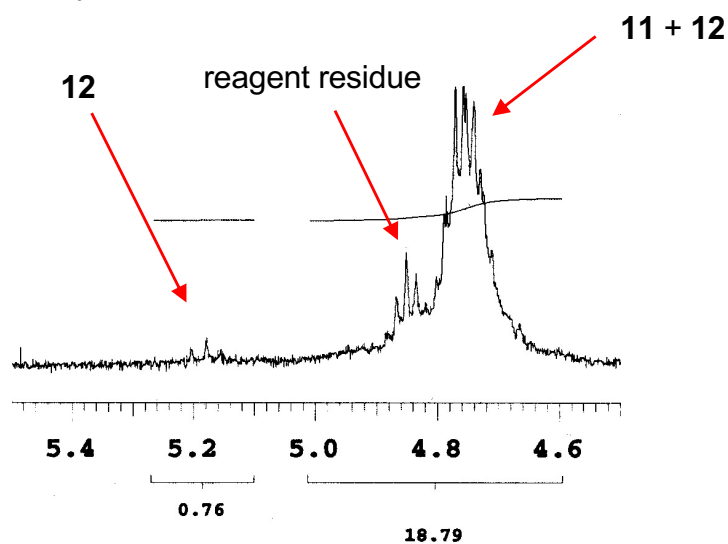

Calculation of **11/12**: see the previous page

# Enantiomeric excess of **14** derived from **13**

Chiralcel OJ-H; hexane/*i*-PrOH 90:10; flow 0.5 mL/min; temp. 25 °C

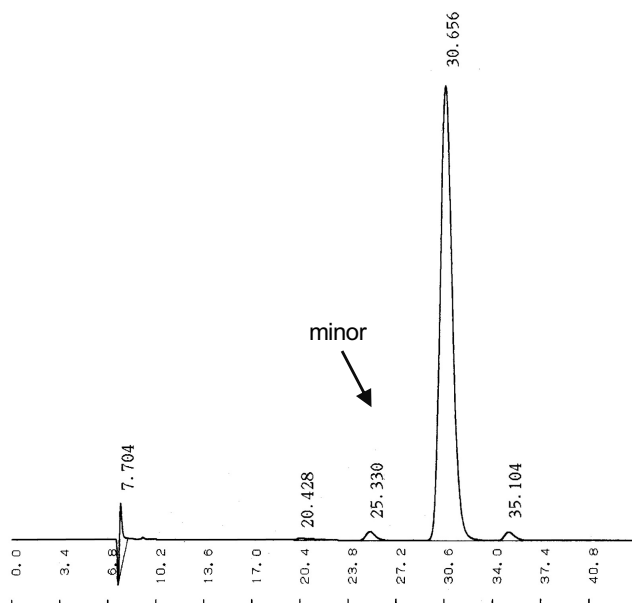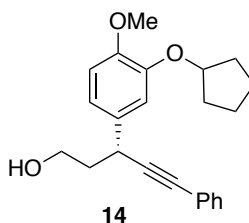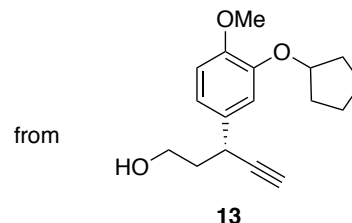

$$\begin{aligned} \% ee &= (92.5377 - 1.4781) \times 100 / (92.5377 + 1.4781) \\ &= 96.856 \\ &\approx 96.9 \end{aligned}$$

**\*\* CALCULATION REPORT \*\***

| CH    | PKNO | TIME   | AREA    | HEIGHT | MK | IDNO | CONC    |
|-------|------|--------|---------|--------|----|------|---------|
| 1     | 1    | 7.704  | 112419  | 6791   |    |      | 3.9308  |
|       | 20   | 20.428 | 15196   | 236    | V  |      | 0.5313  |
|       | 21   | 25.33  | 42273   | 896    |    |      | 1.4781  |
|       | 24   | 30.656 | 2646546 | 44315  | V  |      | 92.5377 |
|       | 25   | 35.104 | 43530   | 867    |    |      | 1.5221  |
| TOTAL |      |        | 2859964 | 53104  |    |      | 100     |

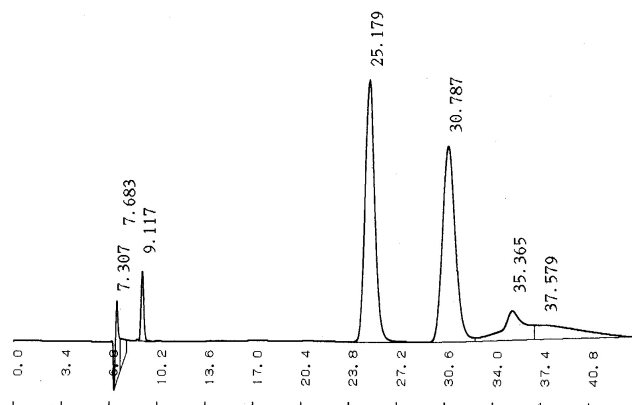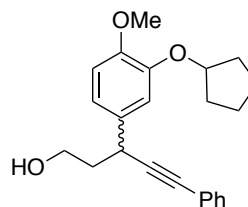

the racemate corresponding to **14**

**\*\* CALCULATION REPORT \*\***

| CH    | PKNO | TIME   | AREA    | HEIGHT | MK | IDNO | CONC    |
|-------|------|--------|---------|--------|----|------|---------|
| 1     | 2    | 7.307  | 124467  | 7976   |    |      | 3.7513  |
|       | 3    | 7.683  | 60208   | 2800   | V  |      | 1.8146  |
|       | 7    | 9.117  | 92561   | 6834   | V  |      | 2.7897  |
|       | 37   | 25.179 | 1220759 | 25529  |    |      | 36.7919 |
|       | 38   | 30.787 | 1202571 | 19044  |    |      | 36.2438 |
|       | 39   | 35.365 | 323554  | 2832   | V  |      | 9.7515  |
|       | 40   | 37.579 | 293887  | 1355   | V  |      | 8.8573  |
| TOTAL |      |        | 3318008 | 66370  |    |      | 100     |

## Regioselectivity producing acetylene **18** over allene **19**

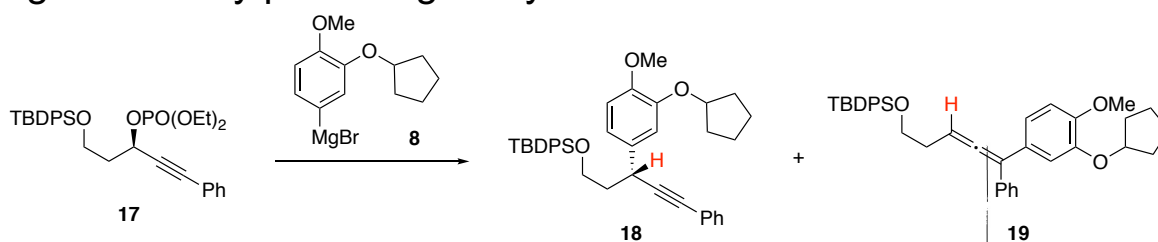

The crude products  
<sup>1</sup>H NMR (300 MHz, CDCl<sub>3</sub>)

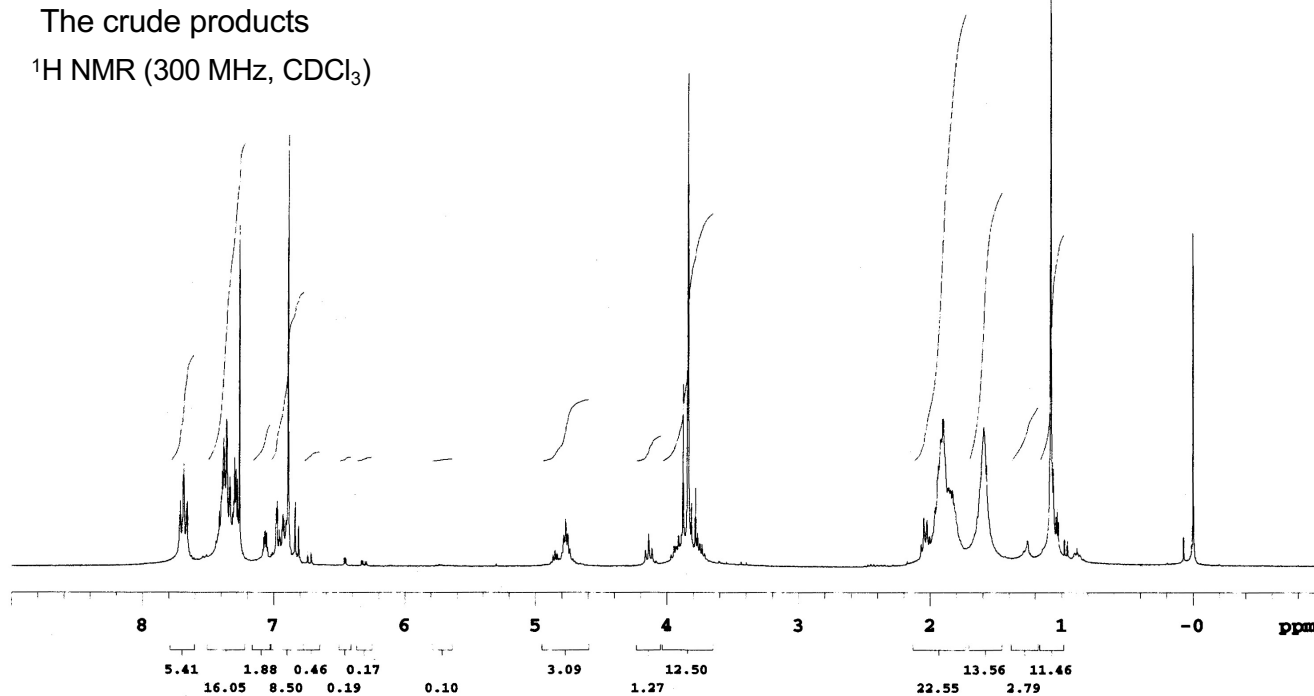

Expansion of the above NMR spectrum

regioselectivity giving **18** (%)

$$= 7.71 \times 100 / (7.71 + 0.46)$$

$$= 94.370$$

$$\approx 94$$

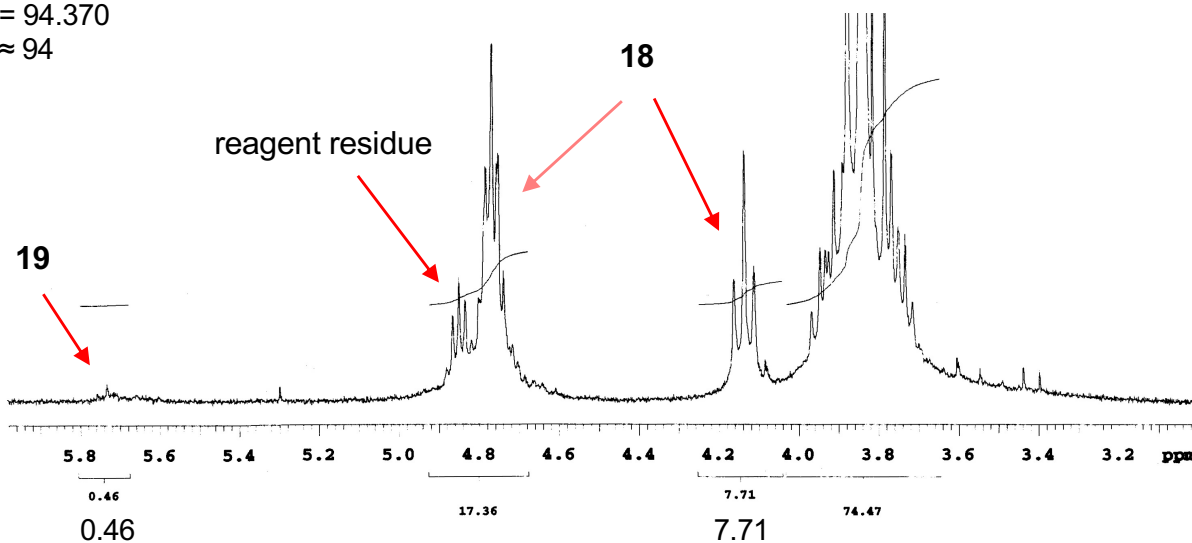

## Enantiomeric excess of **14** derived from **18**

Chiralcel OJ-H; hexane/*i*-PrOH 90:10; flow 0.5 mL/min; temp. 25 °C

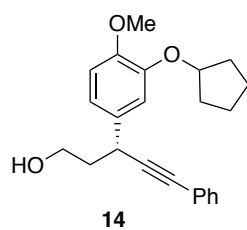

from

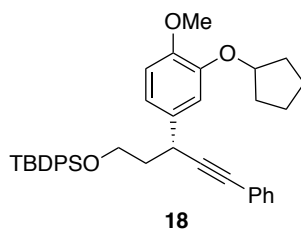

$$\begin{aligned} \% ee &= (97.41 - 2.21) \times 100 / (97.41 + 2.21) \\ &= 95.563 \\ &\approx 95.6 \end{aligned}$$

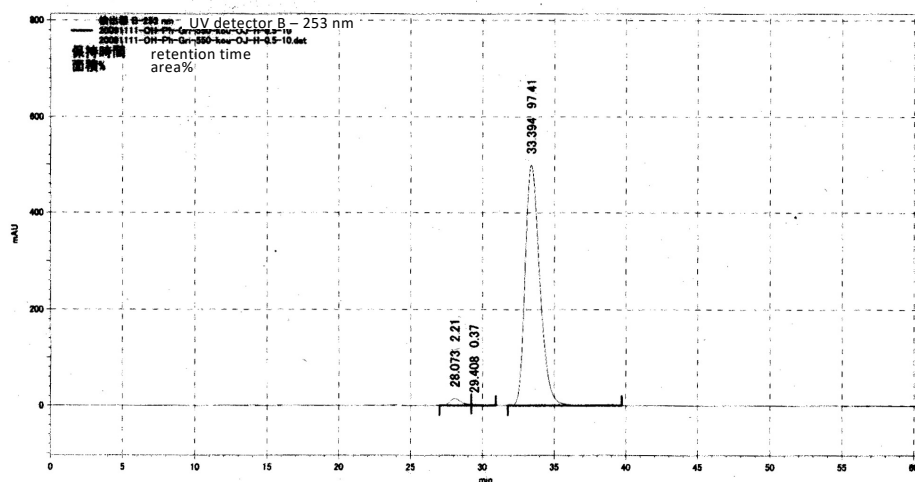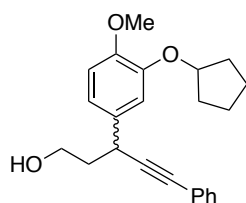

the racemate  
corresponding to **14**

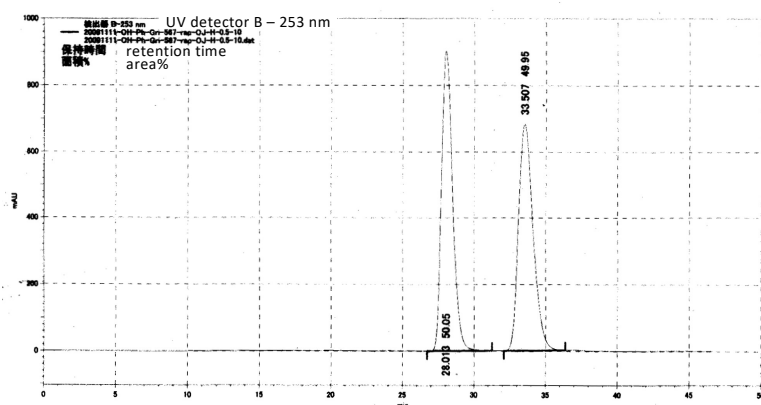

Regioisomeric purity of **23** over the allene  
by the S/N ratio of the  $^1\text{H}$  NMR spectrum of **23**

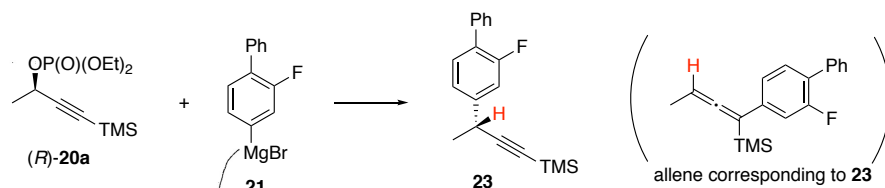

The crude products  
 $^1\text{H}$  NMR (300 MHz,  $\text{CDCl}_3$ )

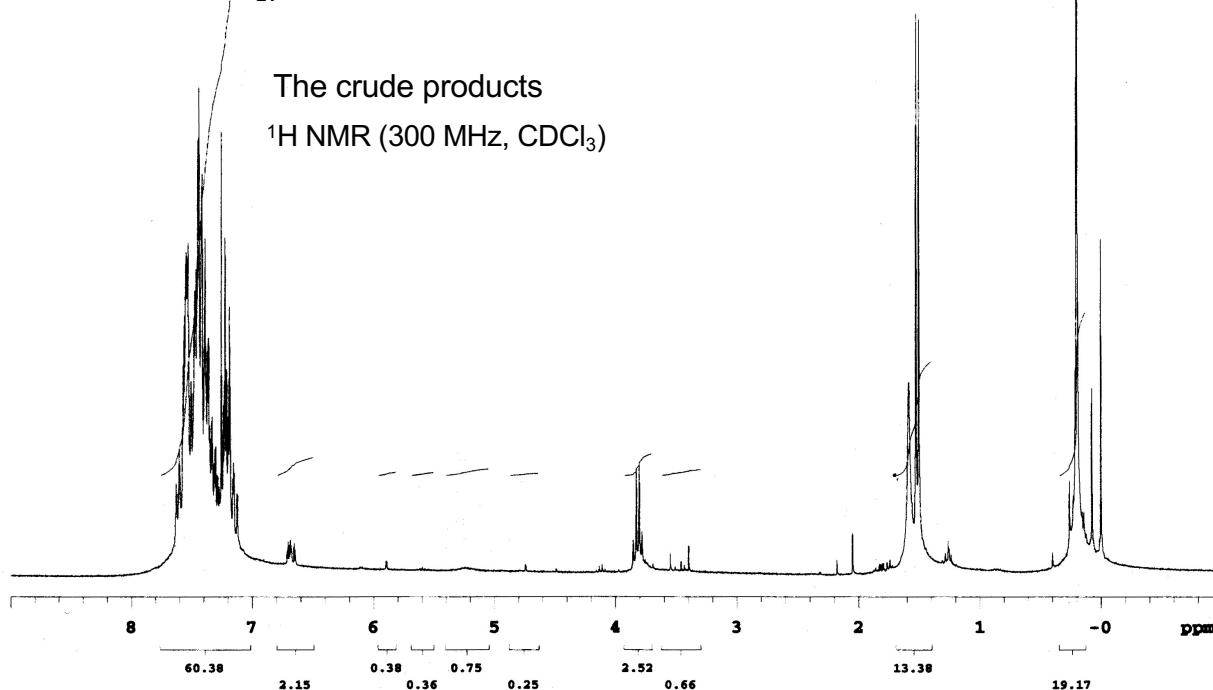

S/N ratio  
= 98.8 : 1.2  
 $\approx >95 : 5$

Expansion of  
the above NMR spectrum

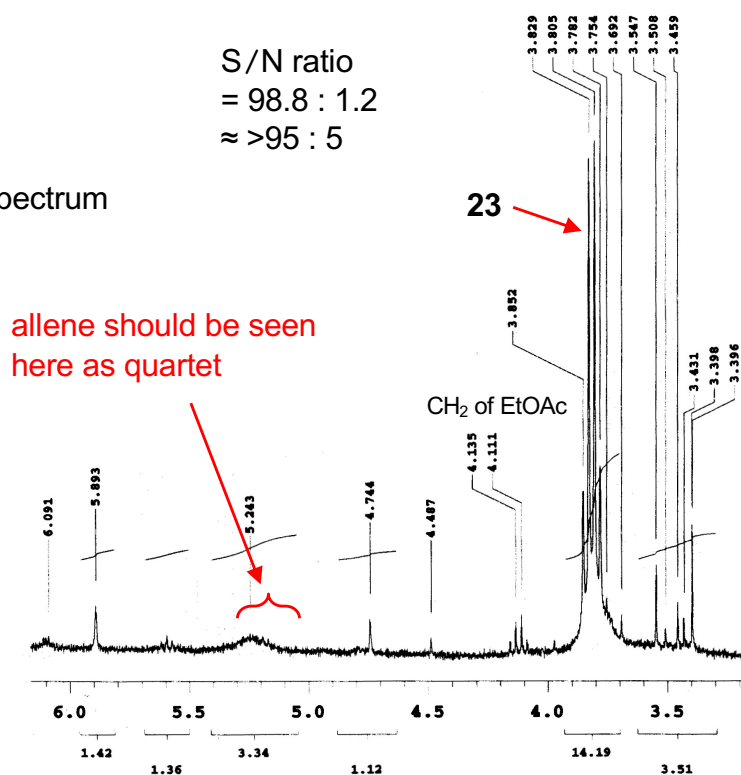

## Enantiomeric excess of **23**

Chiralcel OD-H; hexane/*i*-PrOH 99.9:0.1; flow 0.3 mL/min; temp. 25 °C

$$\begin{aligned} \% ee &= (99.06 - 0.94) \times 100 / (99.06 + 0.94) \\ &= 98.12 \\ &\approx 98.1 \end{aligned}$$

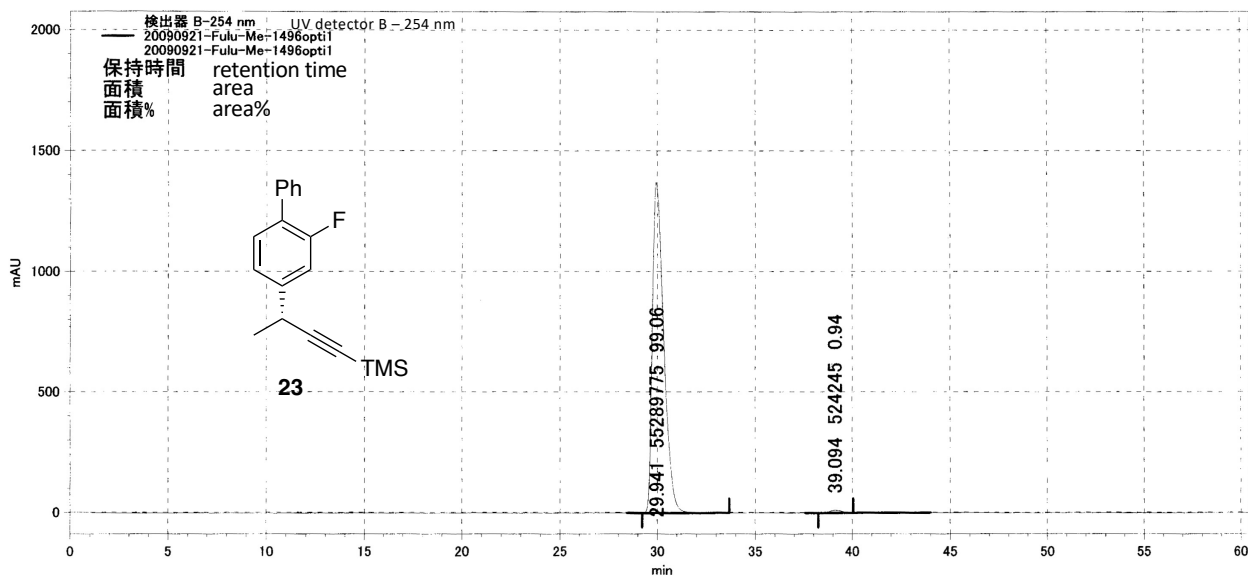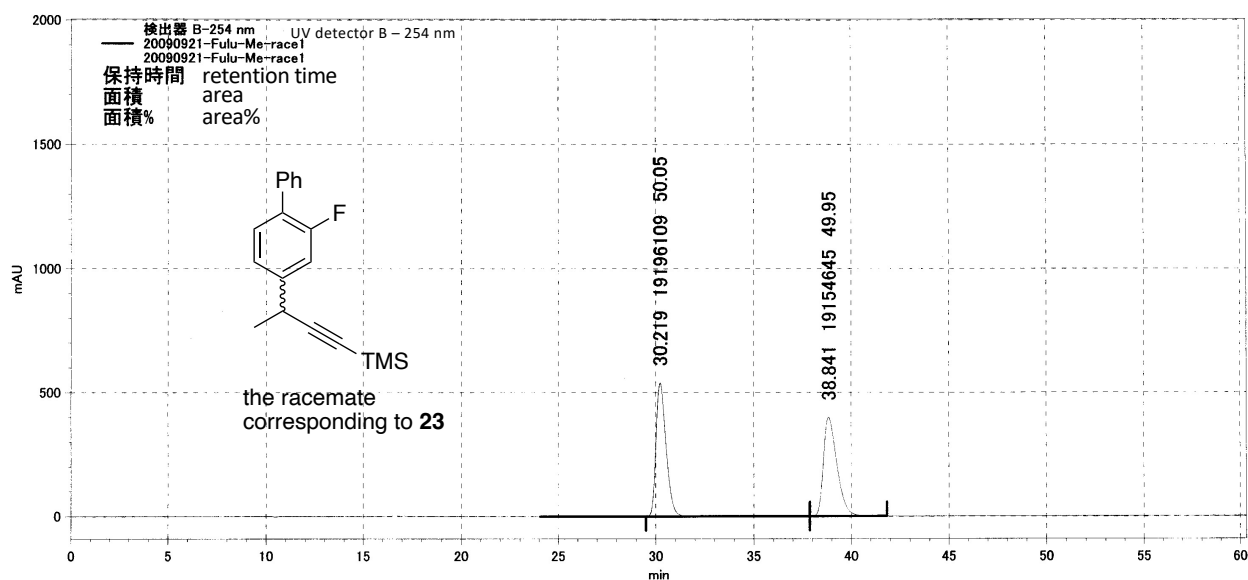



Regioisomeric purity of **25** over the allene  
by the S/N ratio of the  $^1\text{H}$  NMR spectrum of **25**

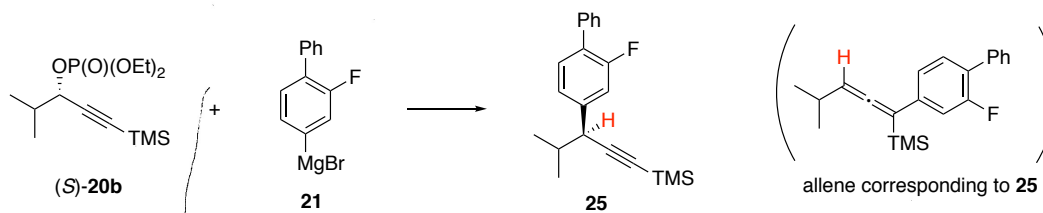

The crude products  
 $^1\text{H}$  NMR (300 MHz,  $\text{CDCl}_3$ )

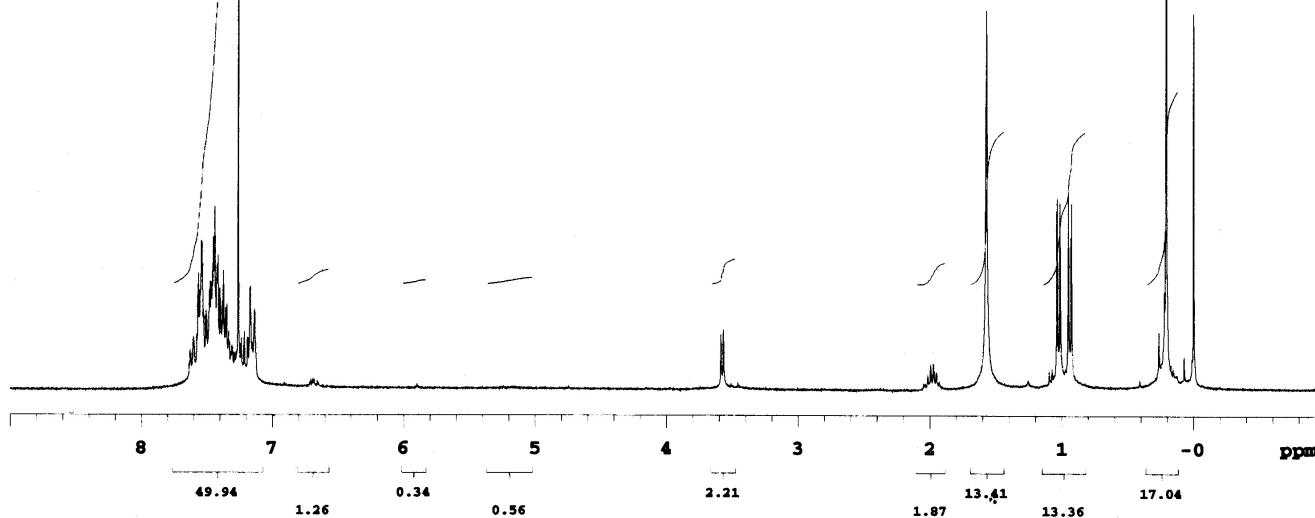

Expansion of  
the above NMR spectrum

S/N ratio  
= 97.3 : 2.7  
 $\approx >95:5$

allene should be seen  
here as doublet

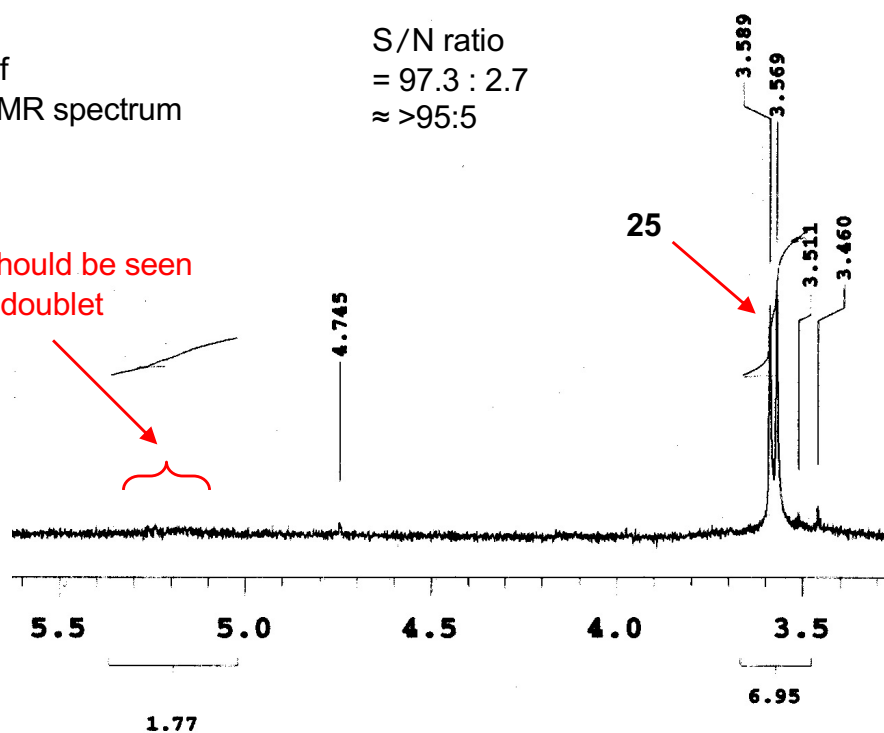

## Enantiomeric excess of **25**

Chiralcel OD-H; hexane/*i*-PrOH 99.9:0.1; flow 0.3 mL/min; temp. 25 °C

$$\begin{aligned} &\% \text{ ee} \\ &= (93.82 - 1.52) \times 100 / (93.82 + 1.52) \\ &= 96.83 \\ &\approx 96.8 \end{aligned}$$

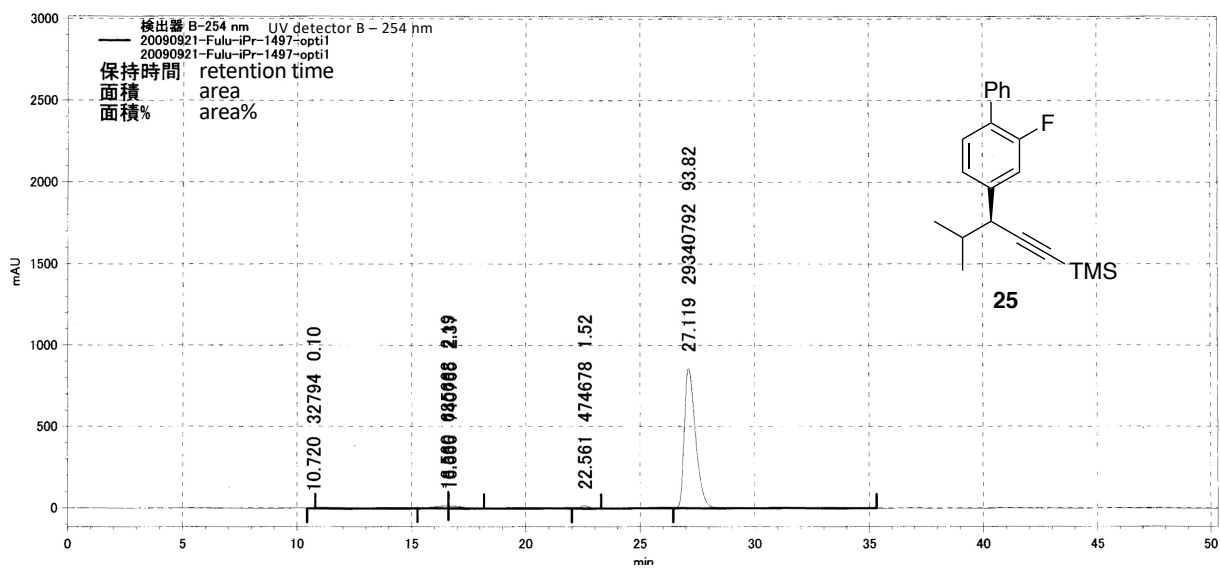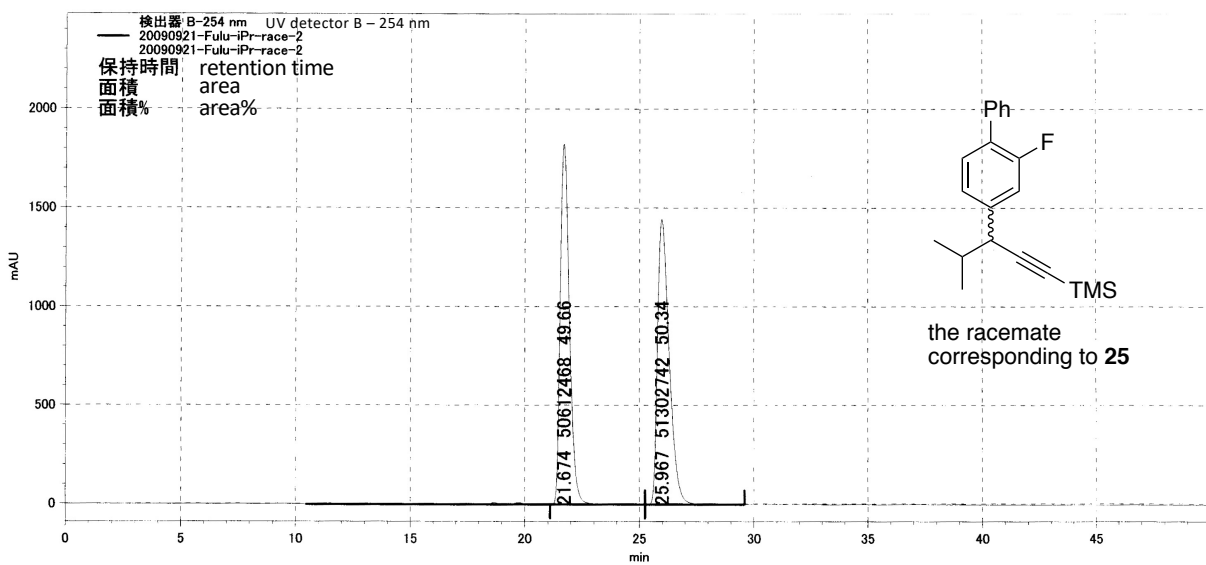

## **6. $^1\text{H}$ , $^{13}\text{C}$ and $^{13}\text{C}$ -APT NMR spectra**

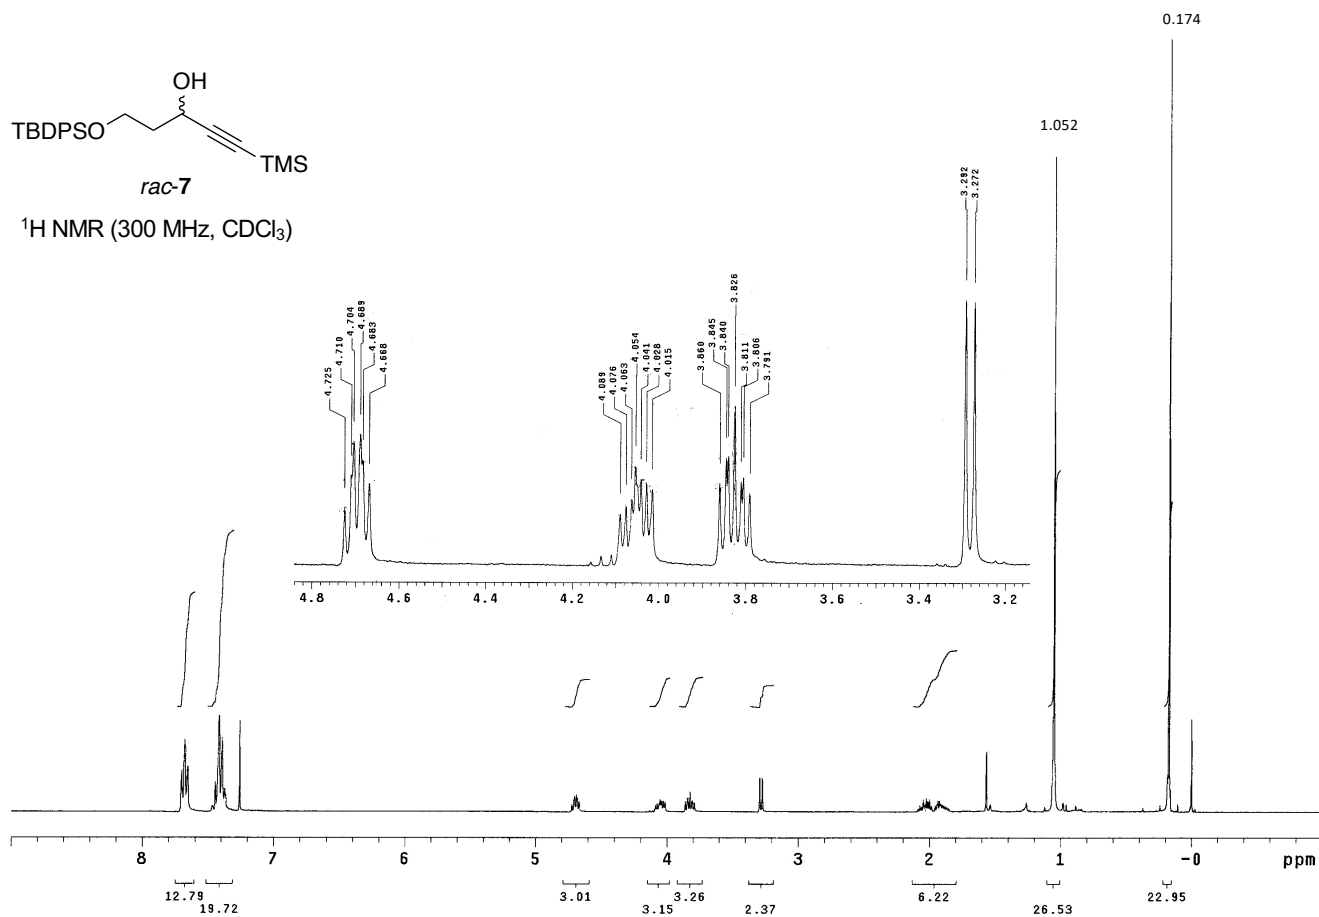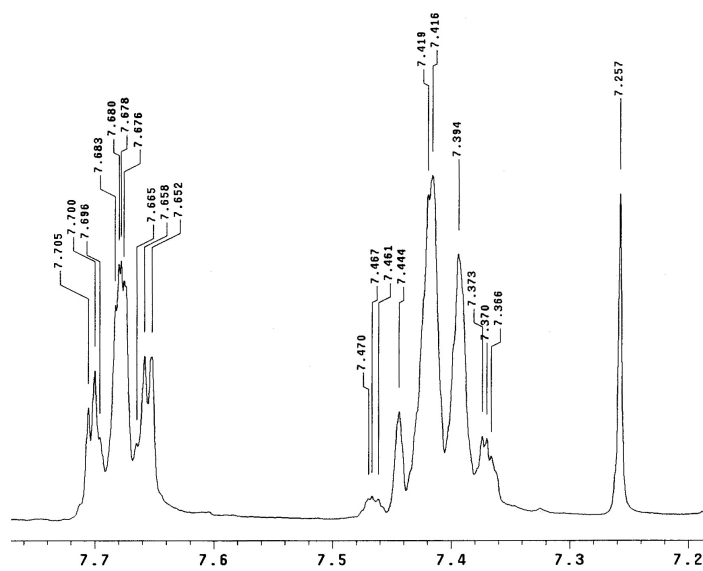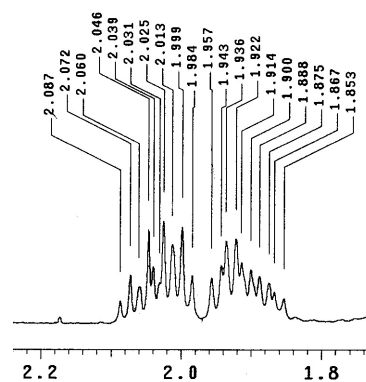

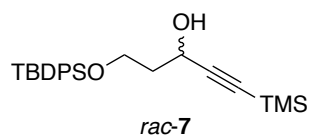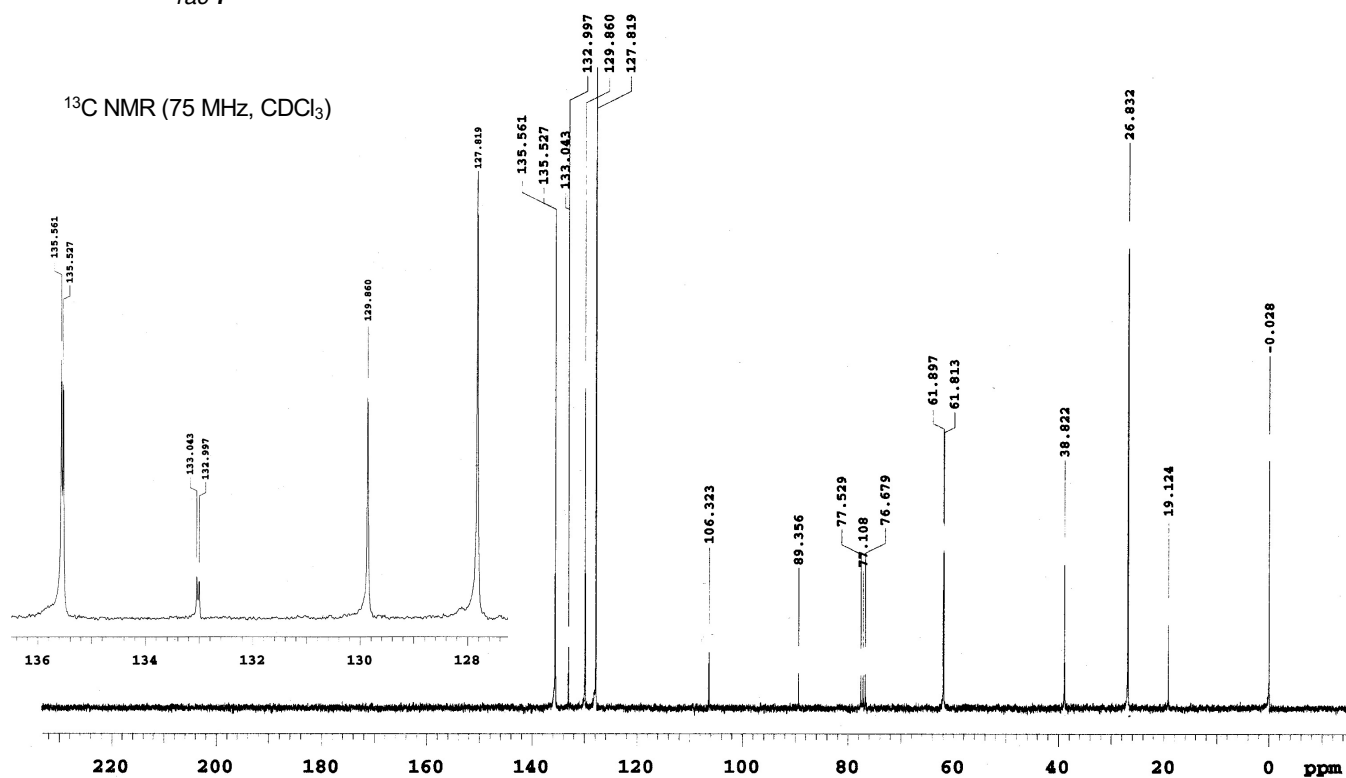

$^{13}\text{C}$ -APT NMR (75 MHz,  $\text{CDCl}_3$ )

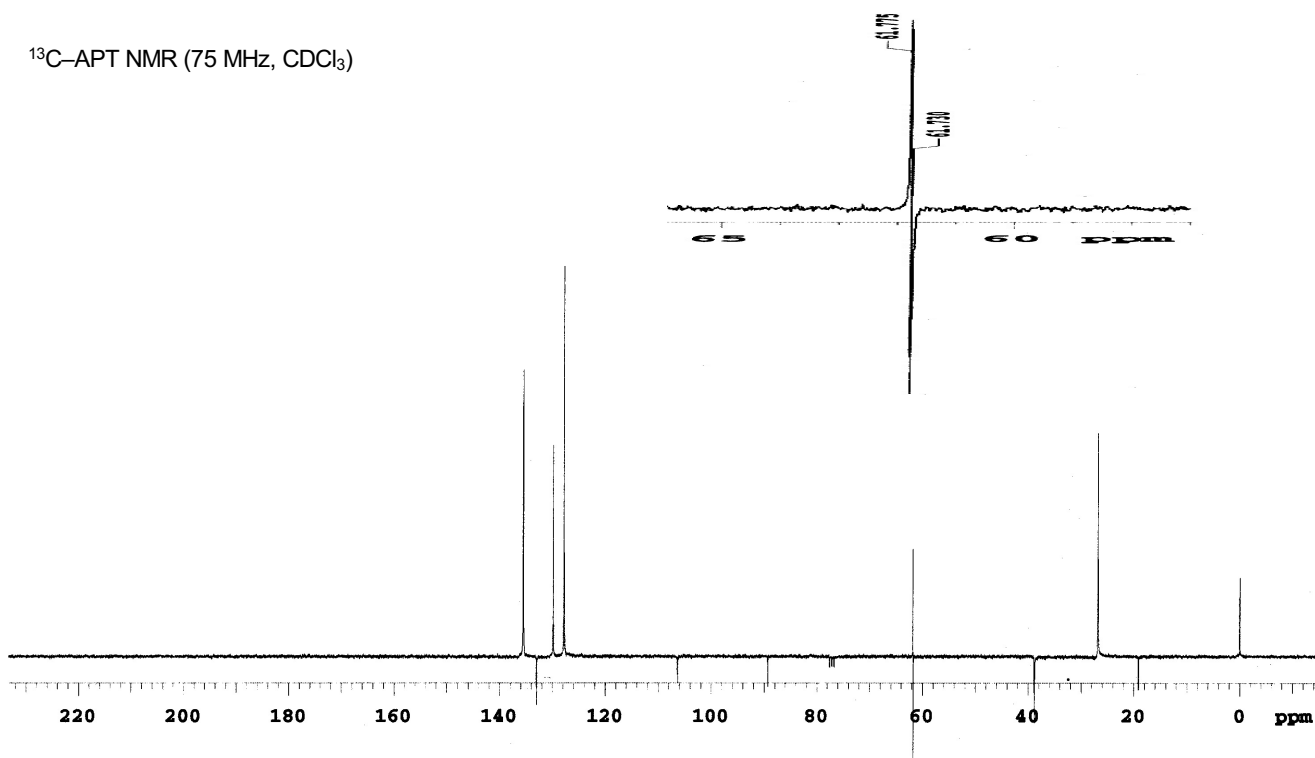

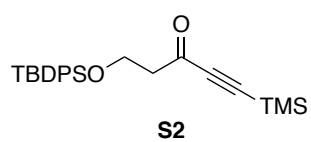

$^1\text{H}$  NMR (300 MHz,  $\text{CDCl}_3$ )

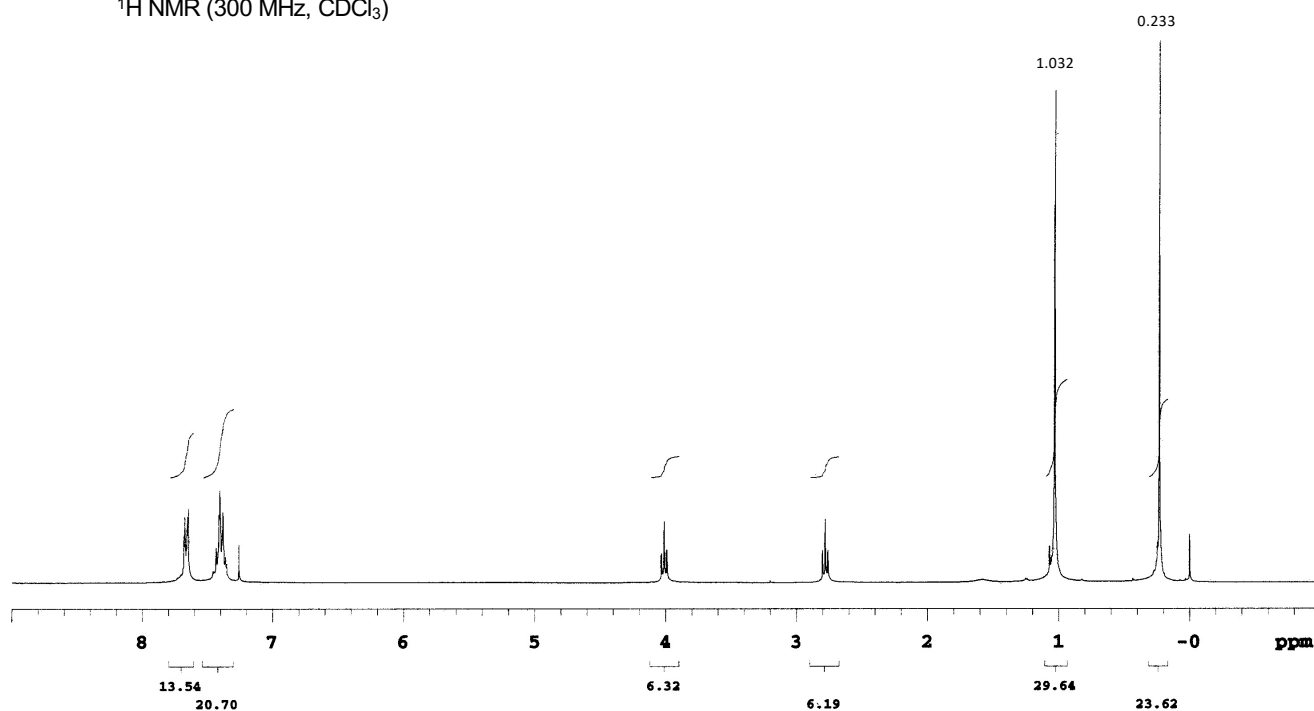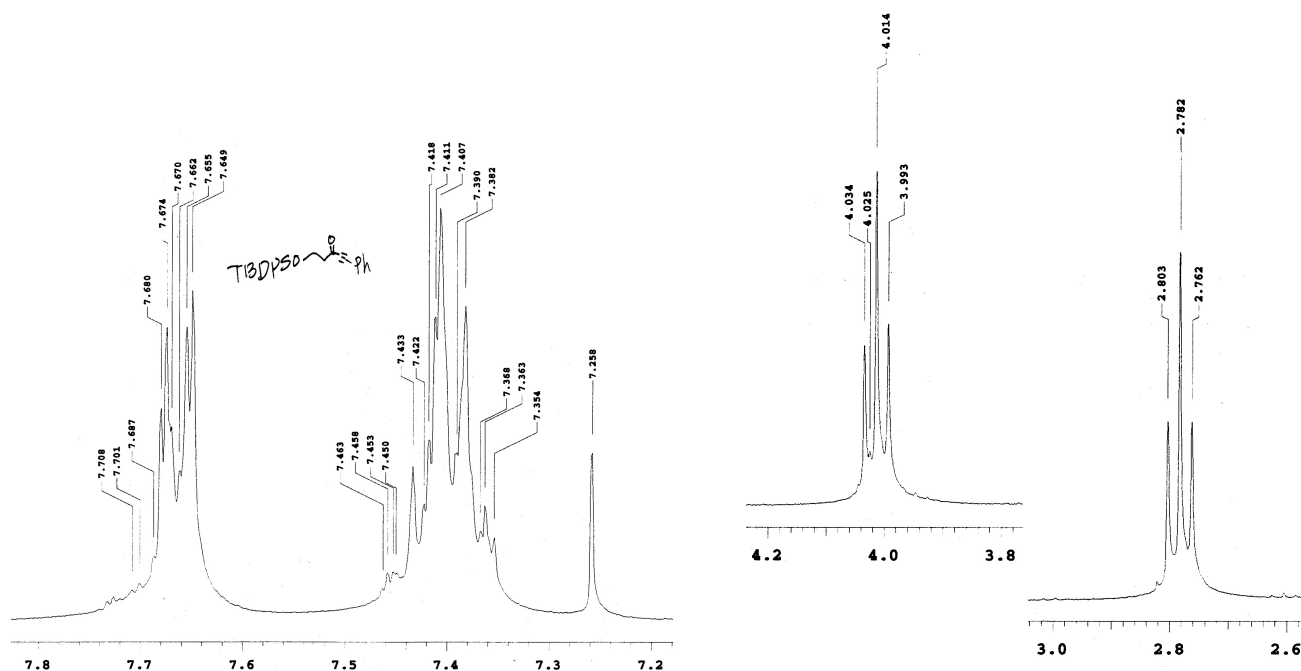

$^{13}\text{C}$  NMR (75 MHz,  $\text{CDCl}_3$ )

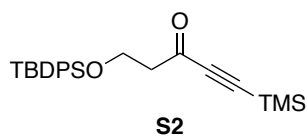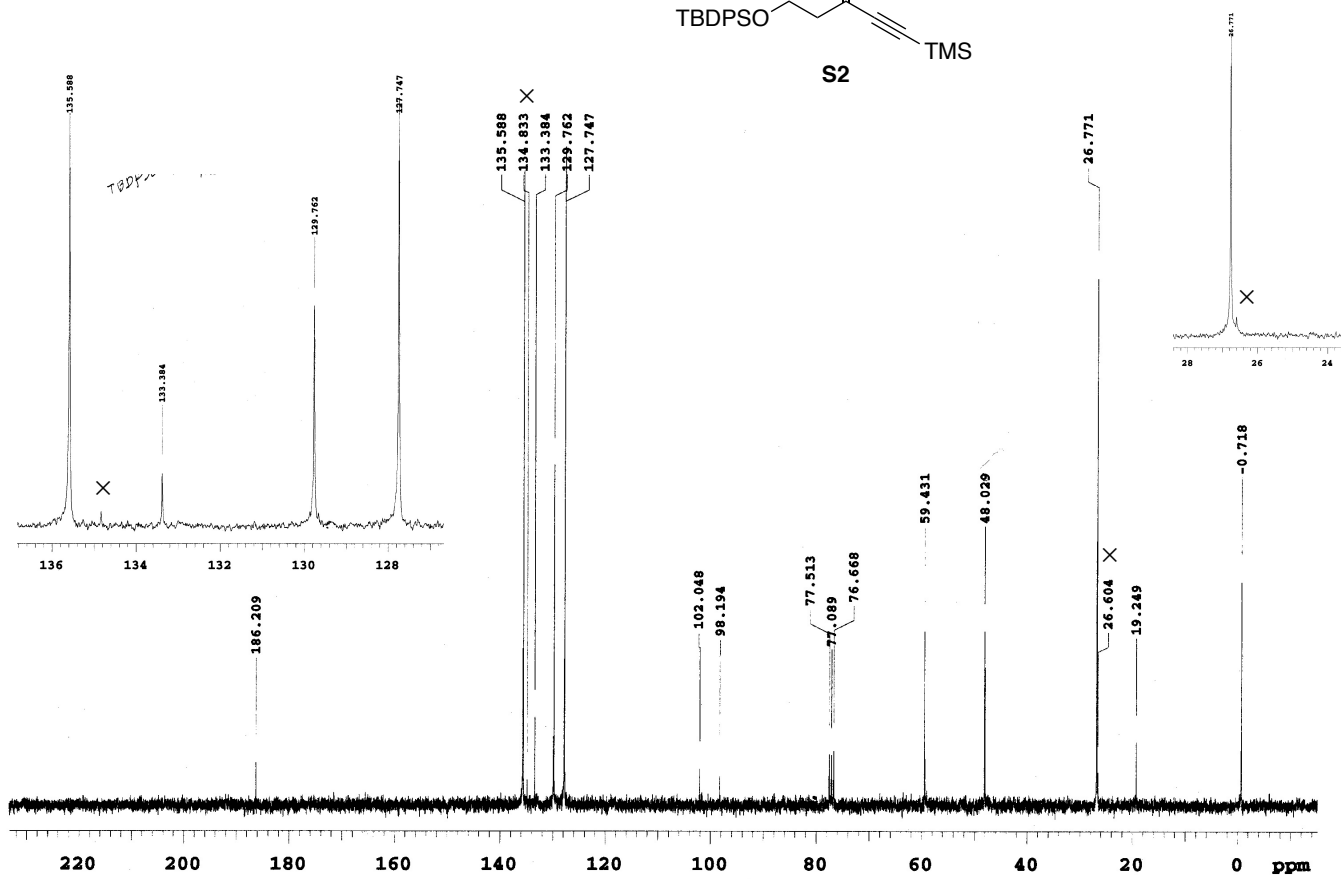

$^{13}\text{C}$ -APT NMR (75 MHz,  $\text{CDCl}_3$ )

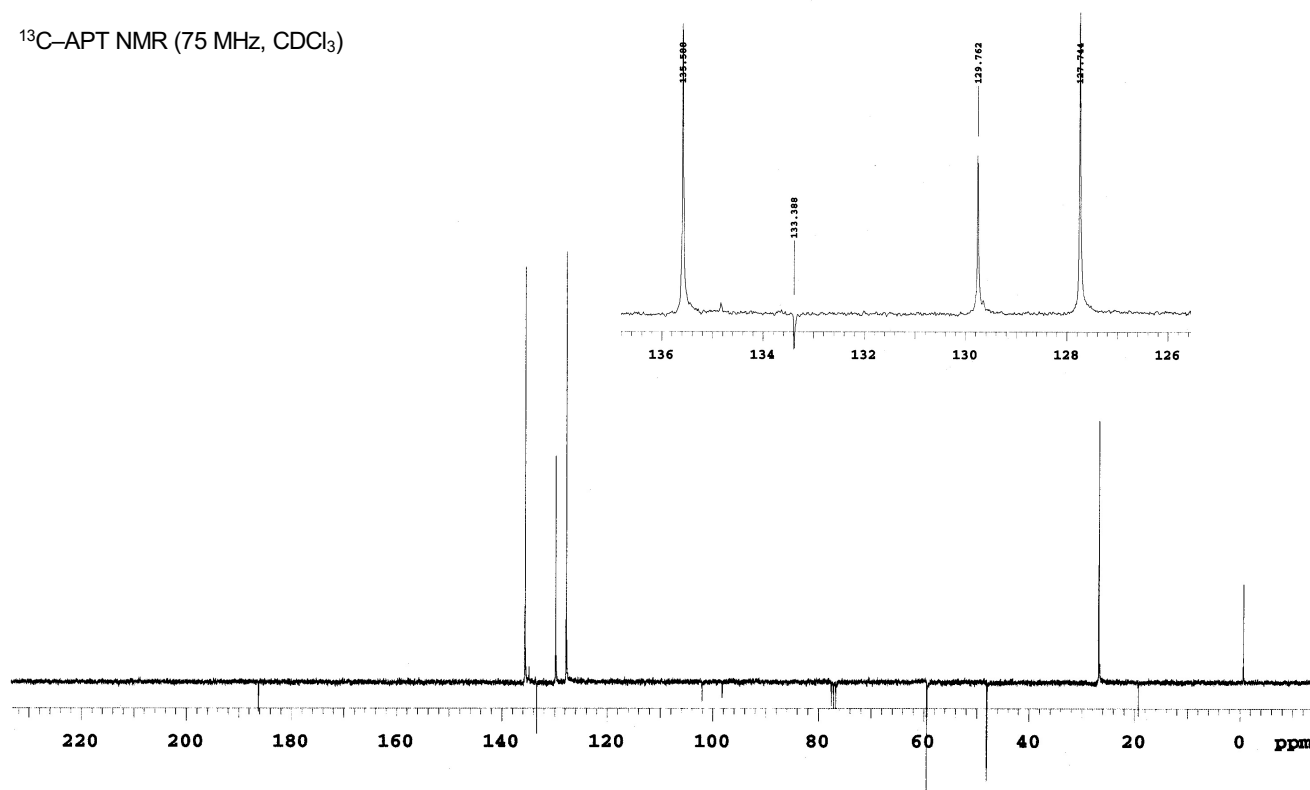

**S33**

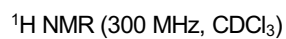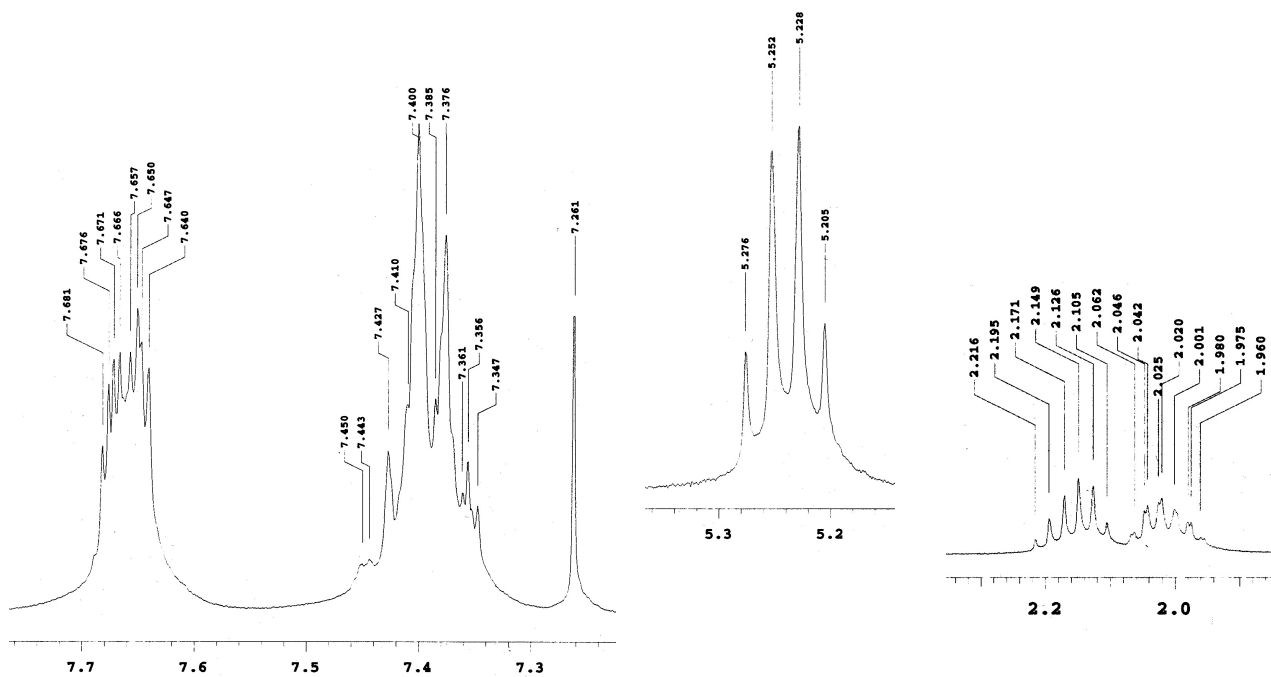



$^{13}\text{C}$  NMR (75 MHz,  $\text{CDCl}_3$ )

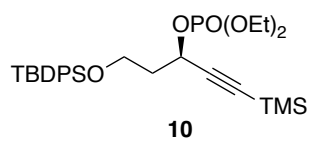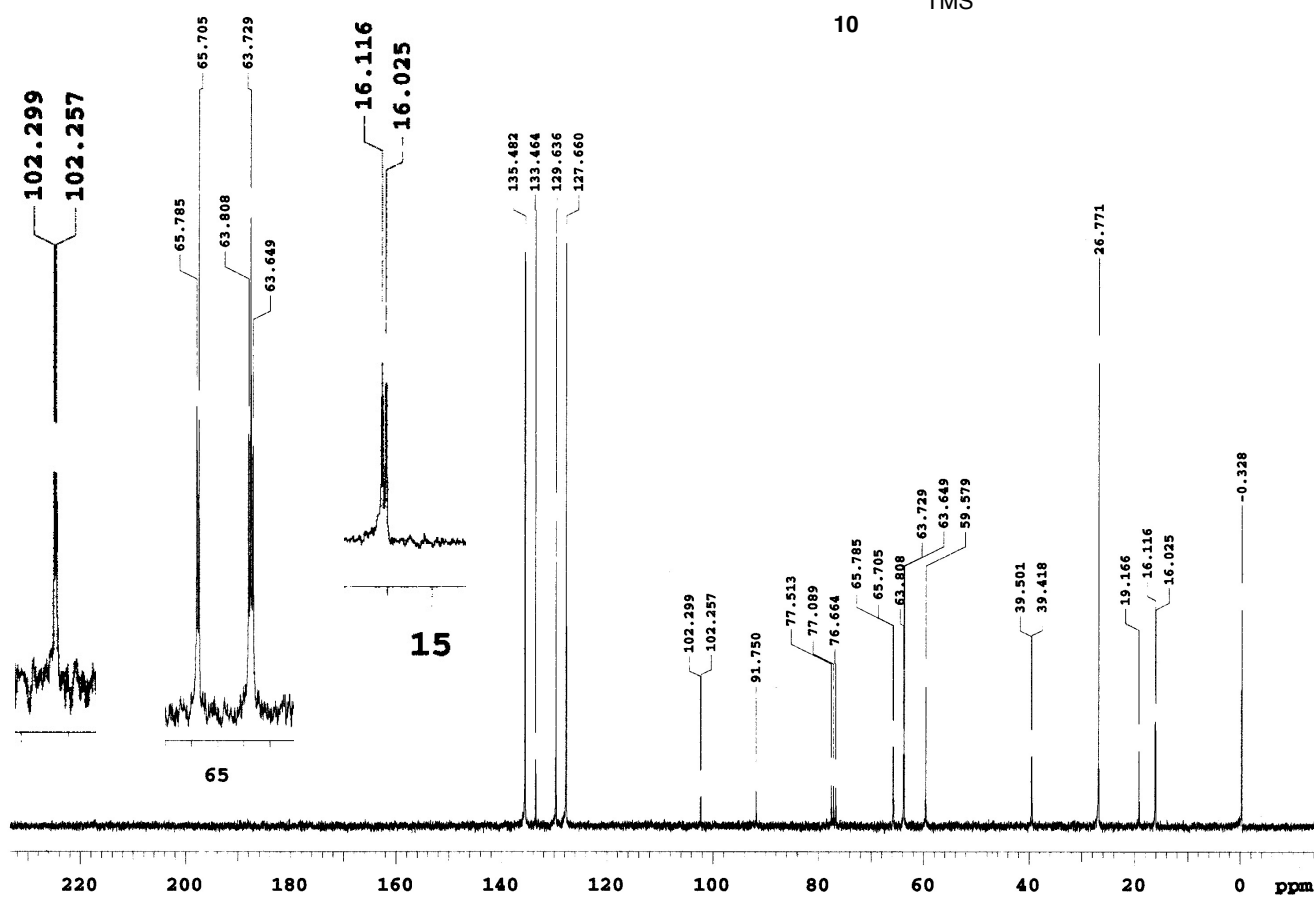

$^{13}\text{C}$ -APT NMR (75 MHz,  $\text{CDCl}_3$ )

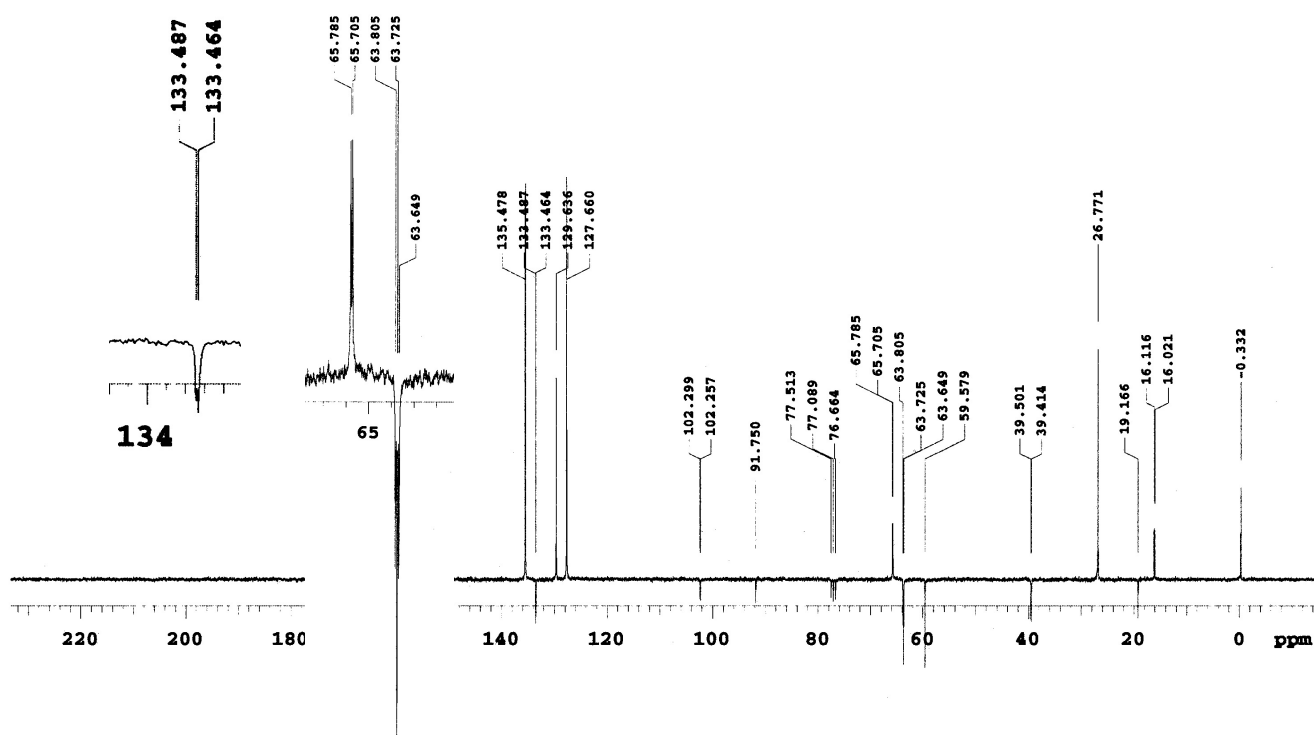

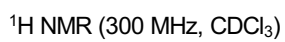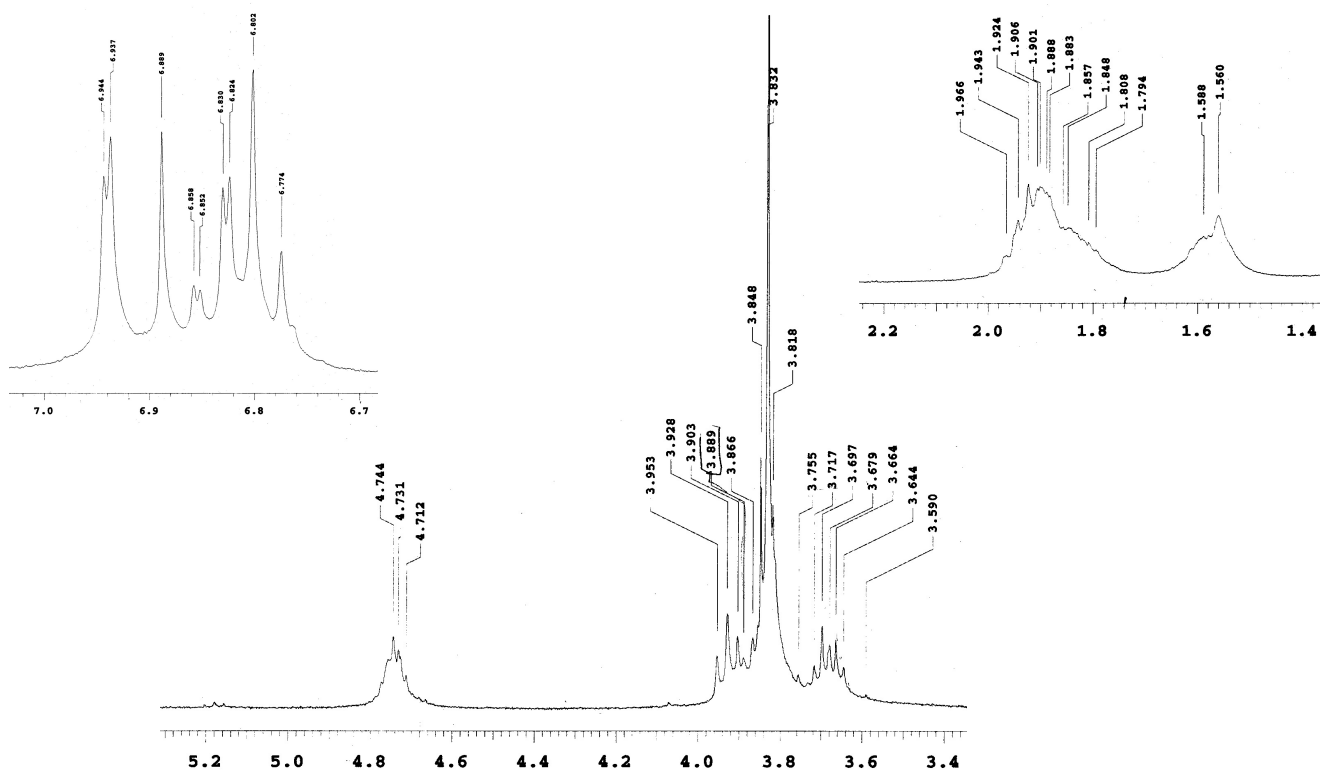

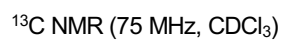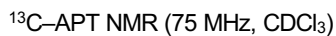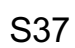

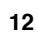

1.049

0.178

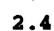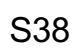

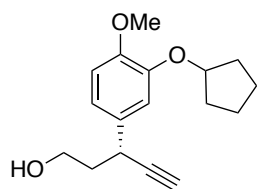

13

$^1\text{H}$  NMR (300 MHz,  $\text{CDCl}_3$ )

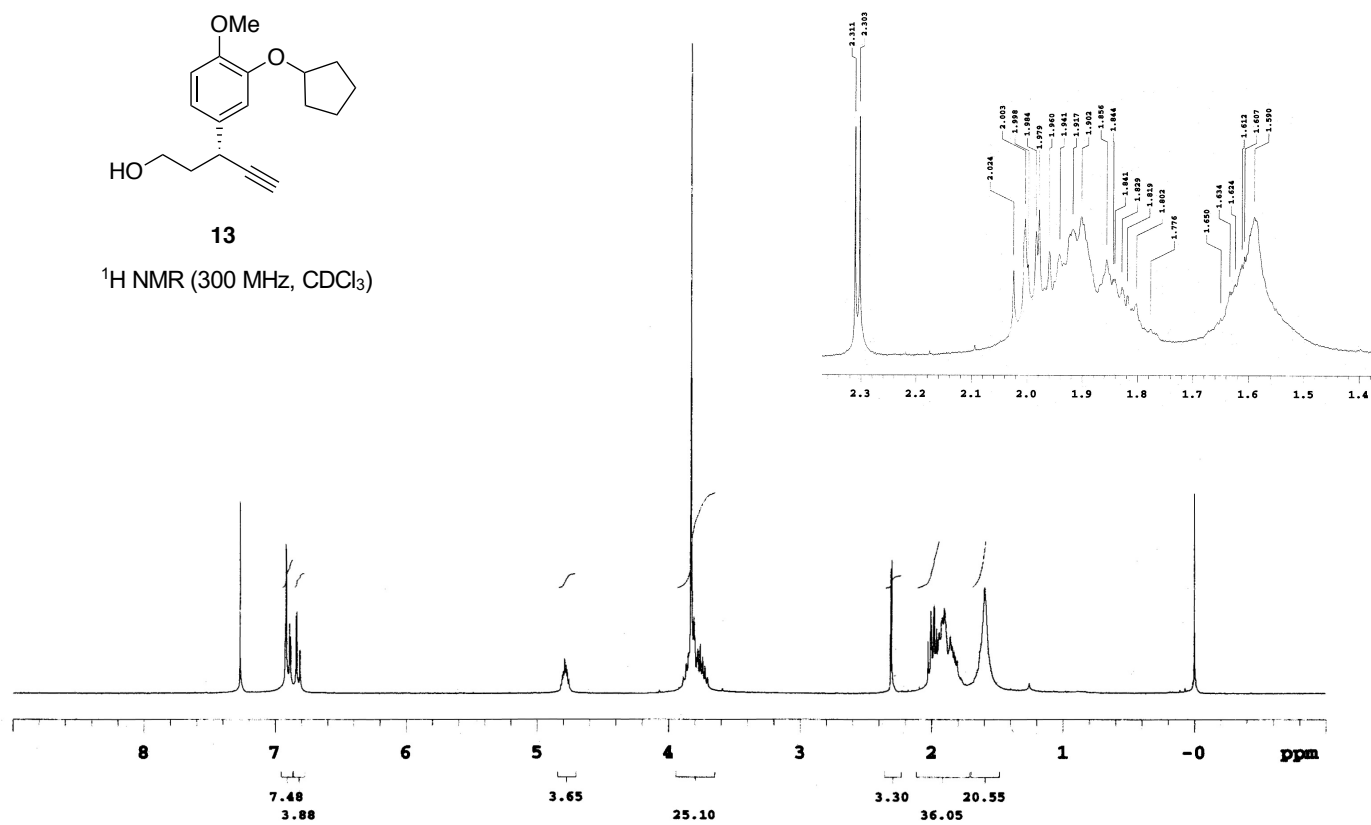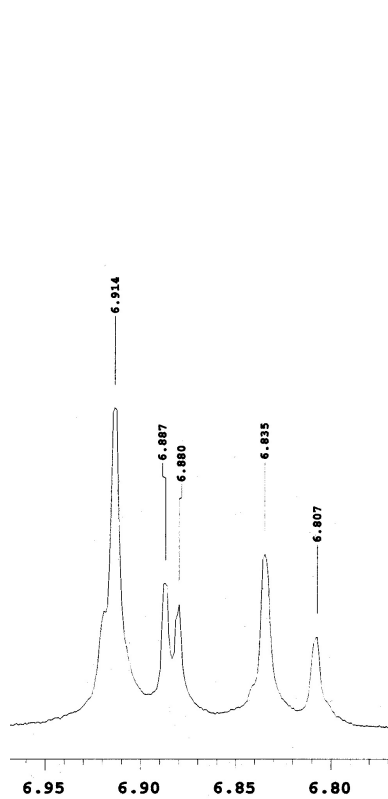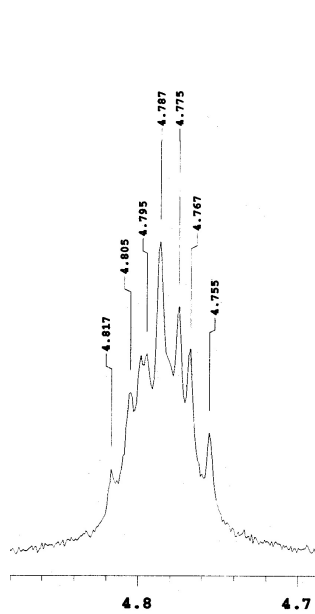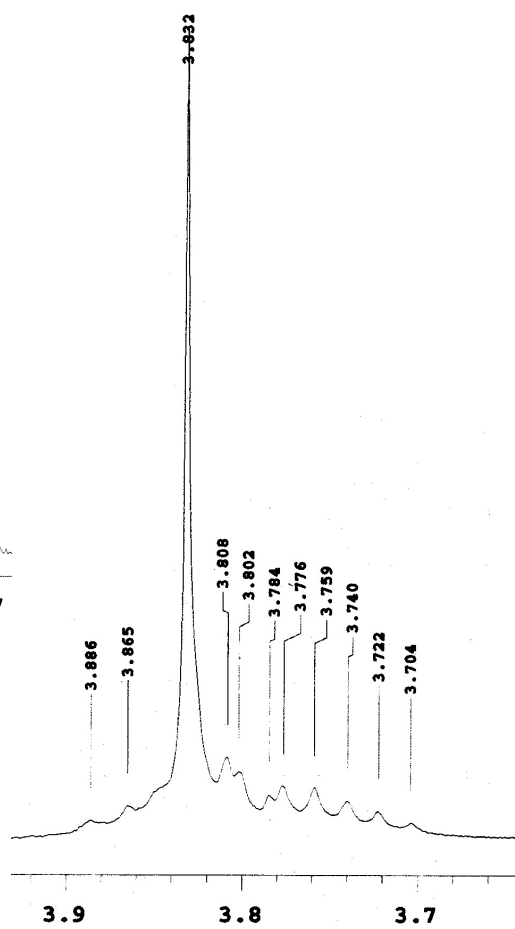

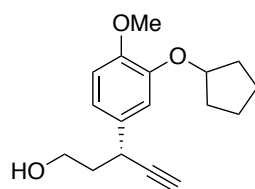

13

$^{13}\text{C}$  NMR (75 MHz,  $\text{CDCl}_3$ )

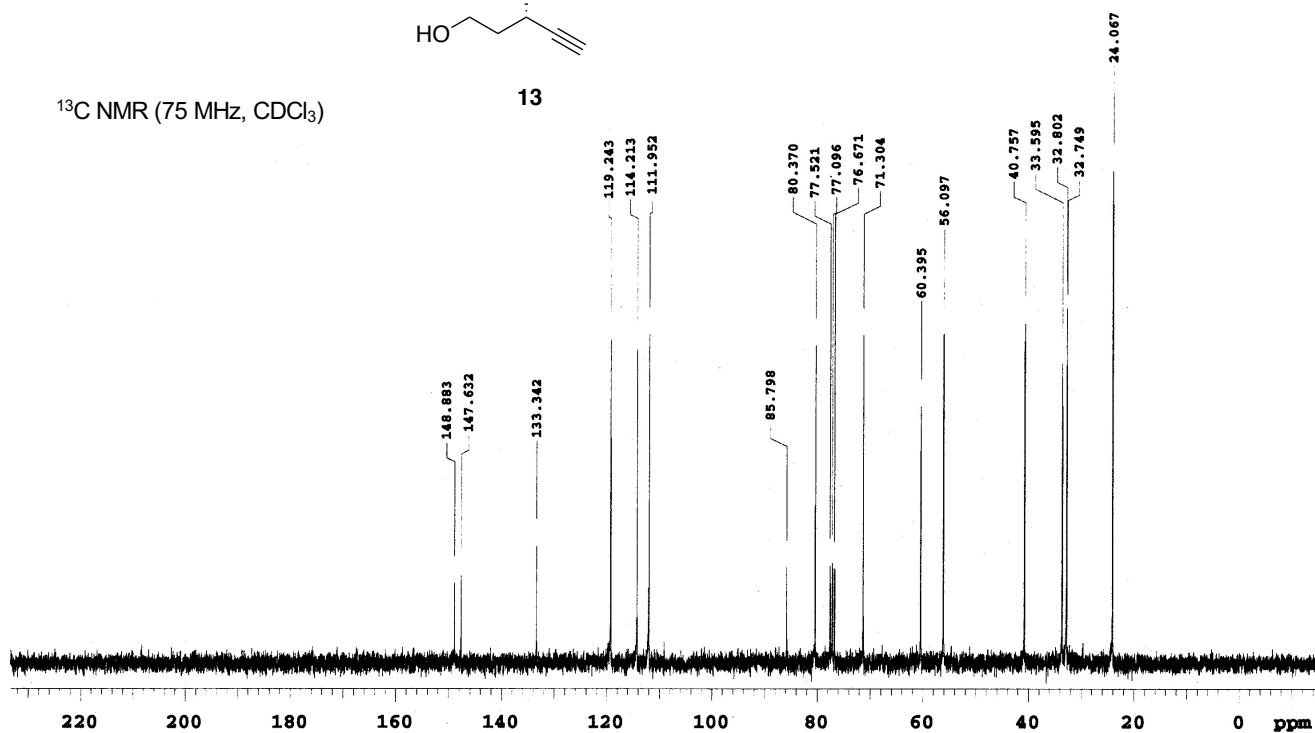

$^{13}\text{C}$ -APT NMR (75 MHz,  $\text{CDCl}_3$ )

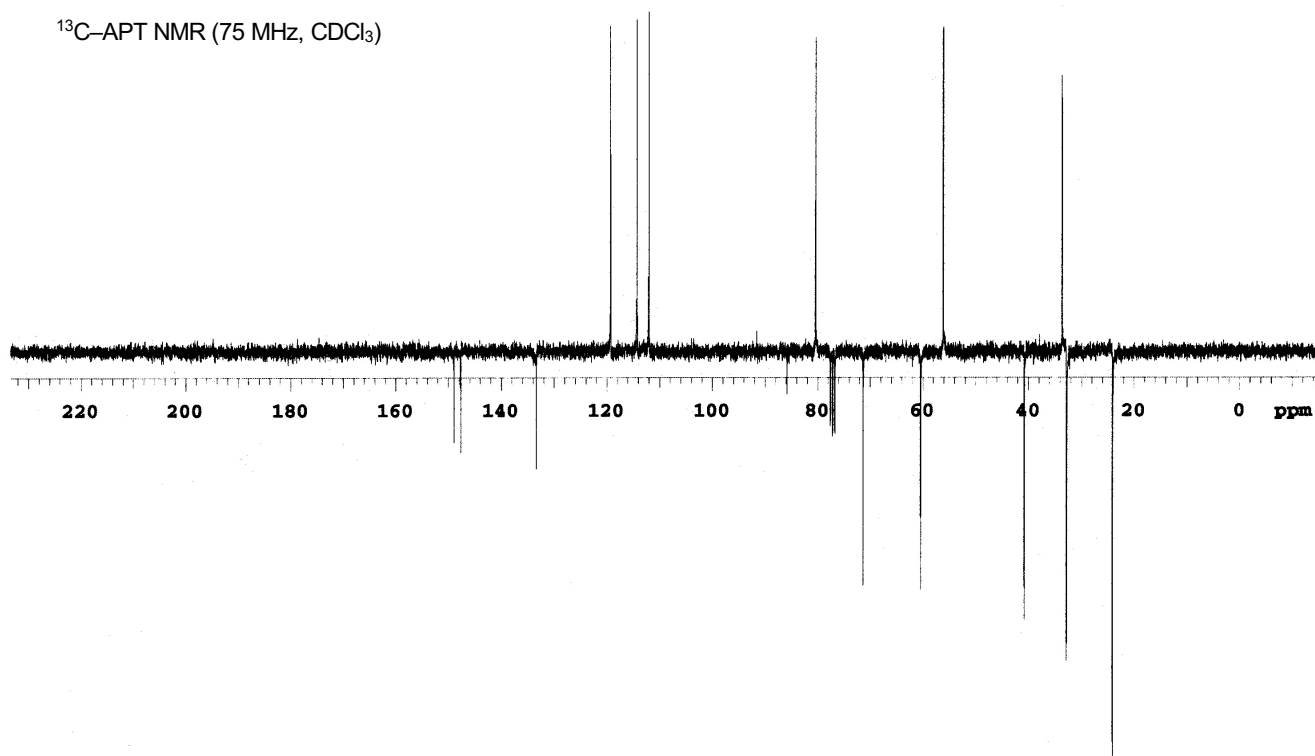

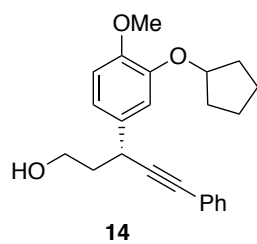

$^1\text{H}$  NMR (300 MHz,  $\text{CDCl}_3$ )

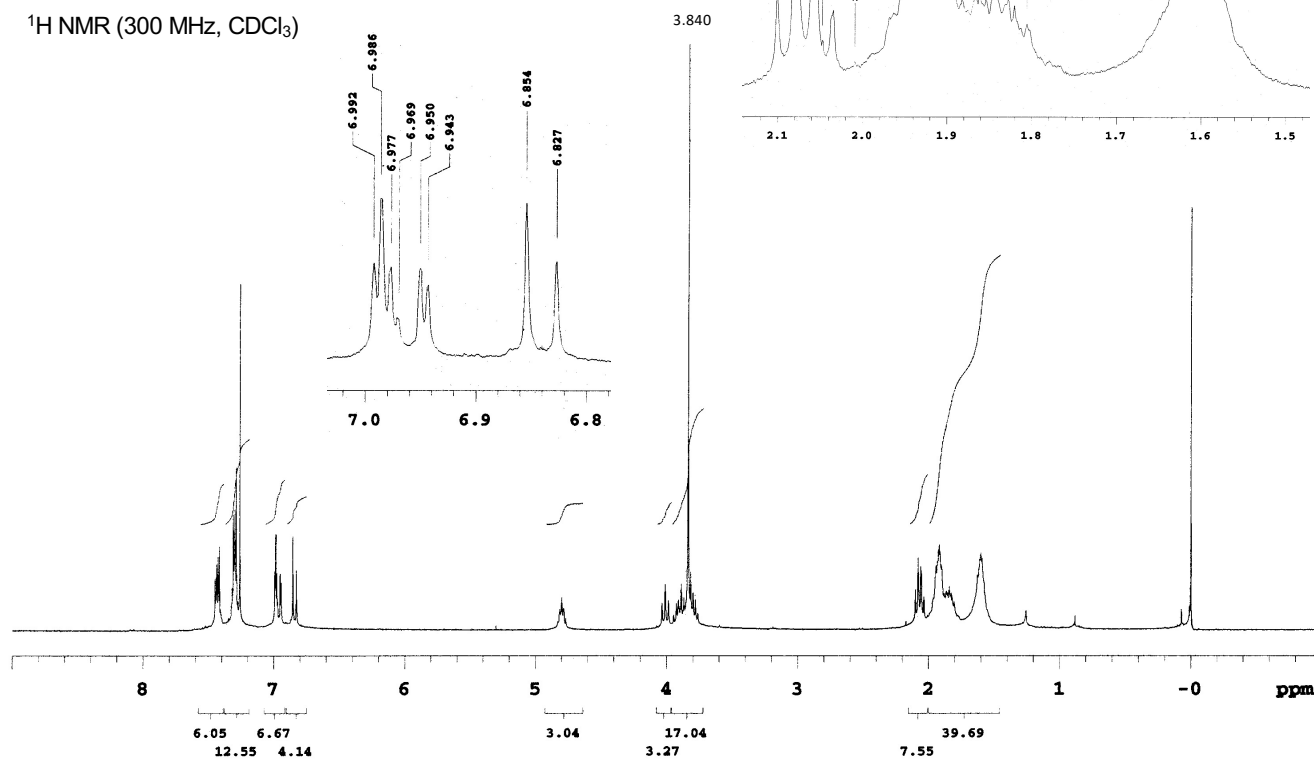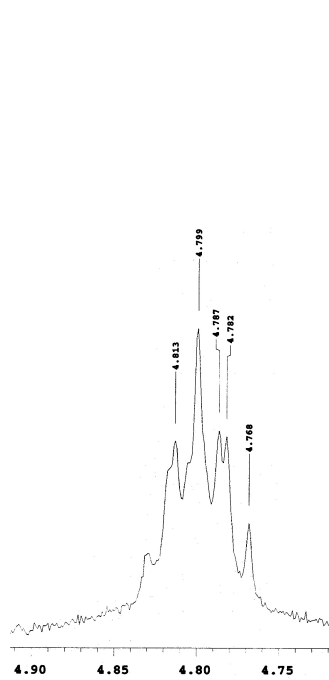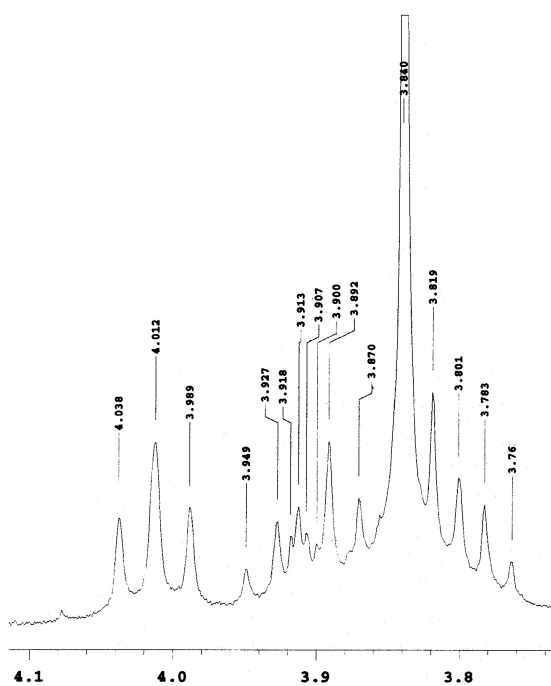

$^{13}\text{C}$  NMR (75 MHz,  $\text{CDCl}_3$ )

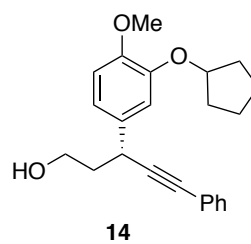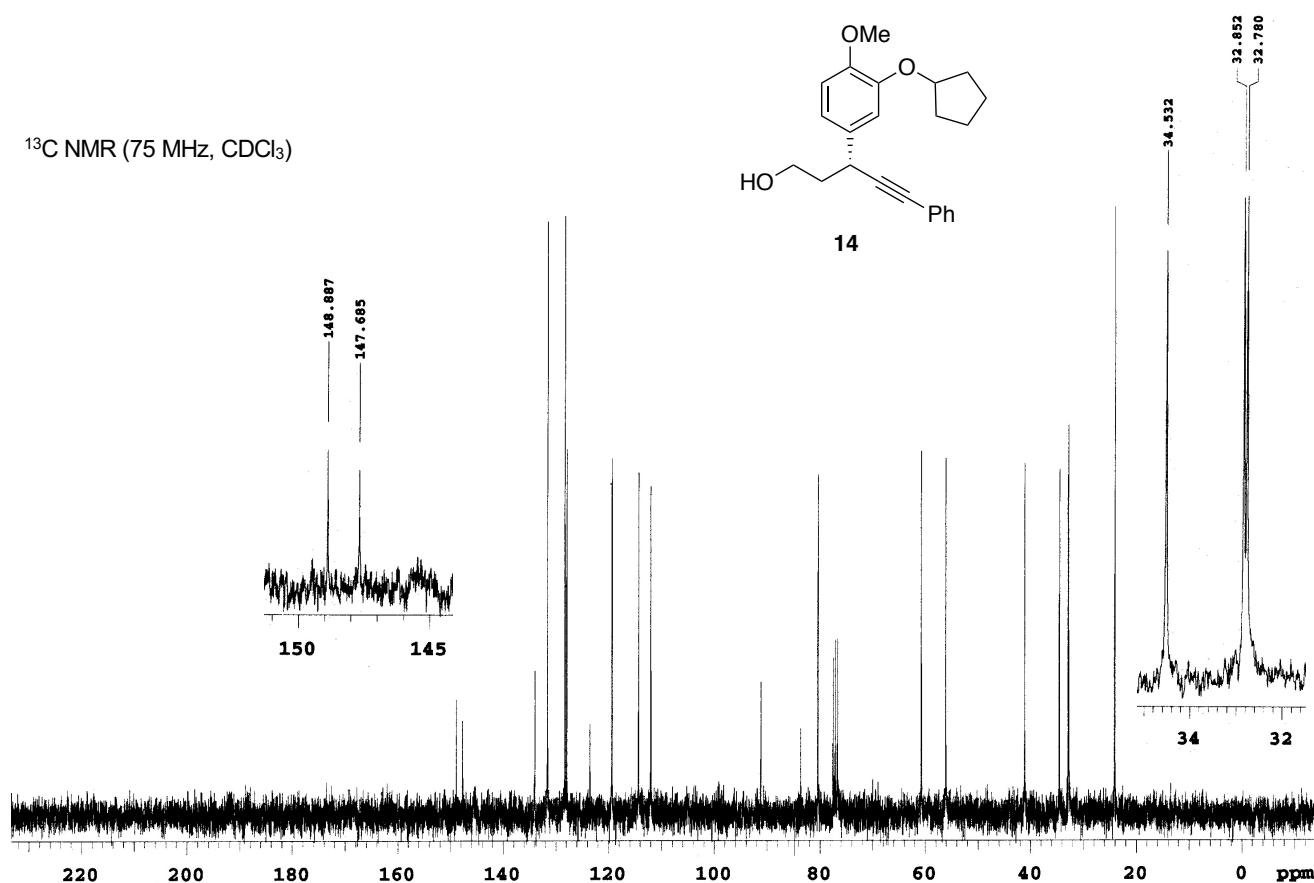

$^{13}\text{C}$ -APT NMR (75 MHz,  $\text{CDCl}_3$ )

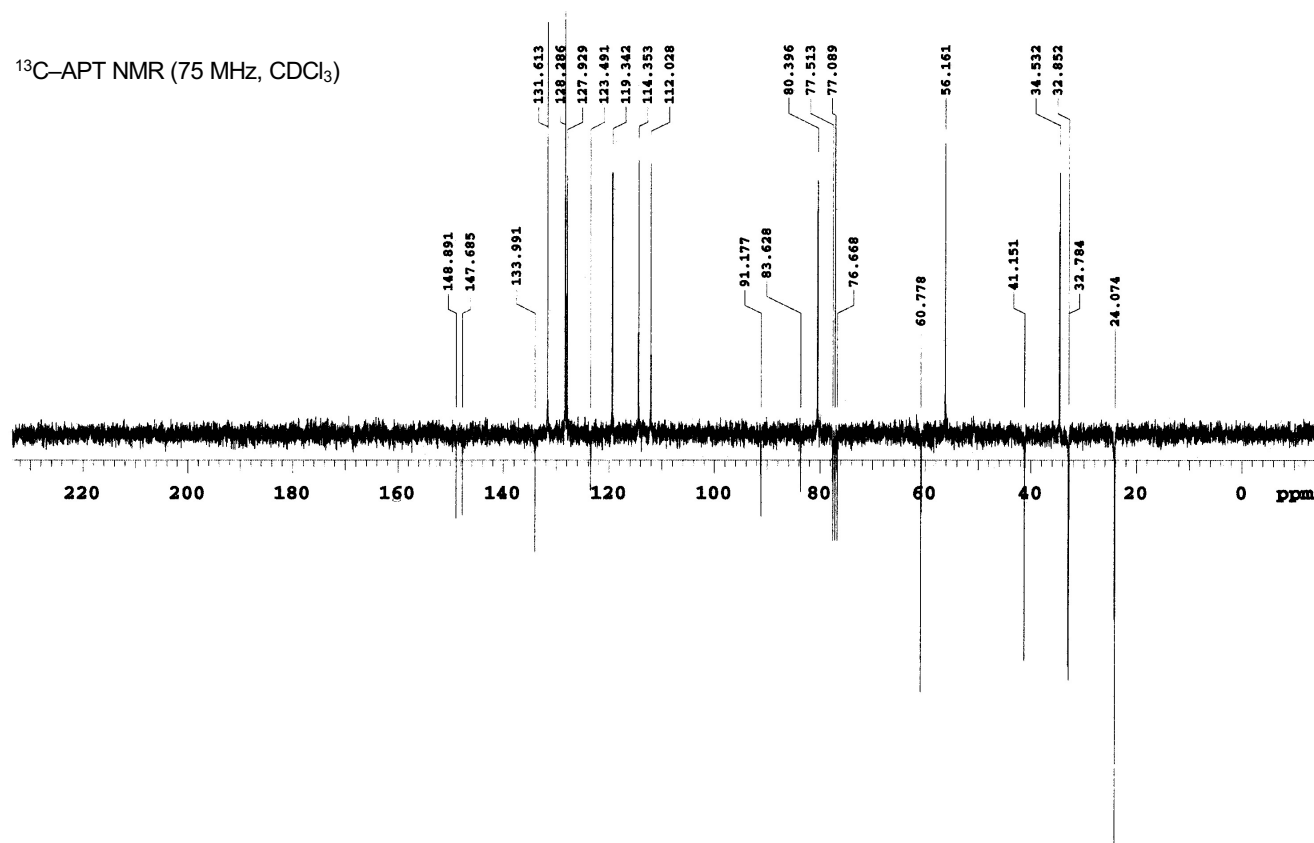



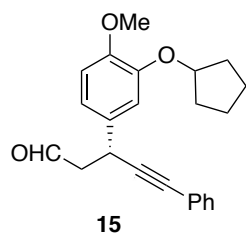

$^1\text{H}$  NMR (300 MHz,  $\text{CDCl}_3$ )

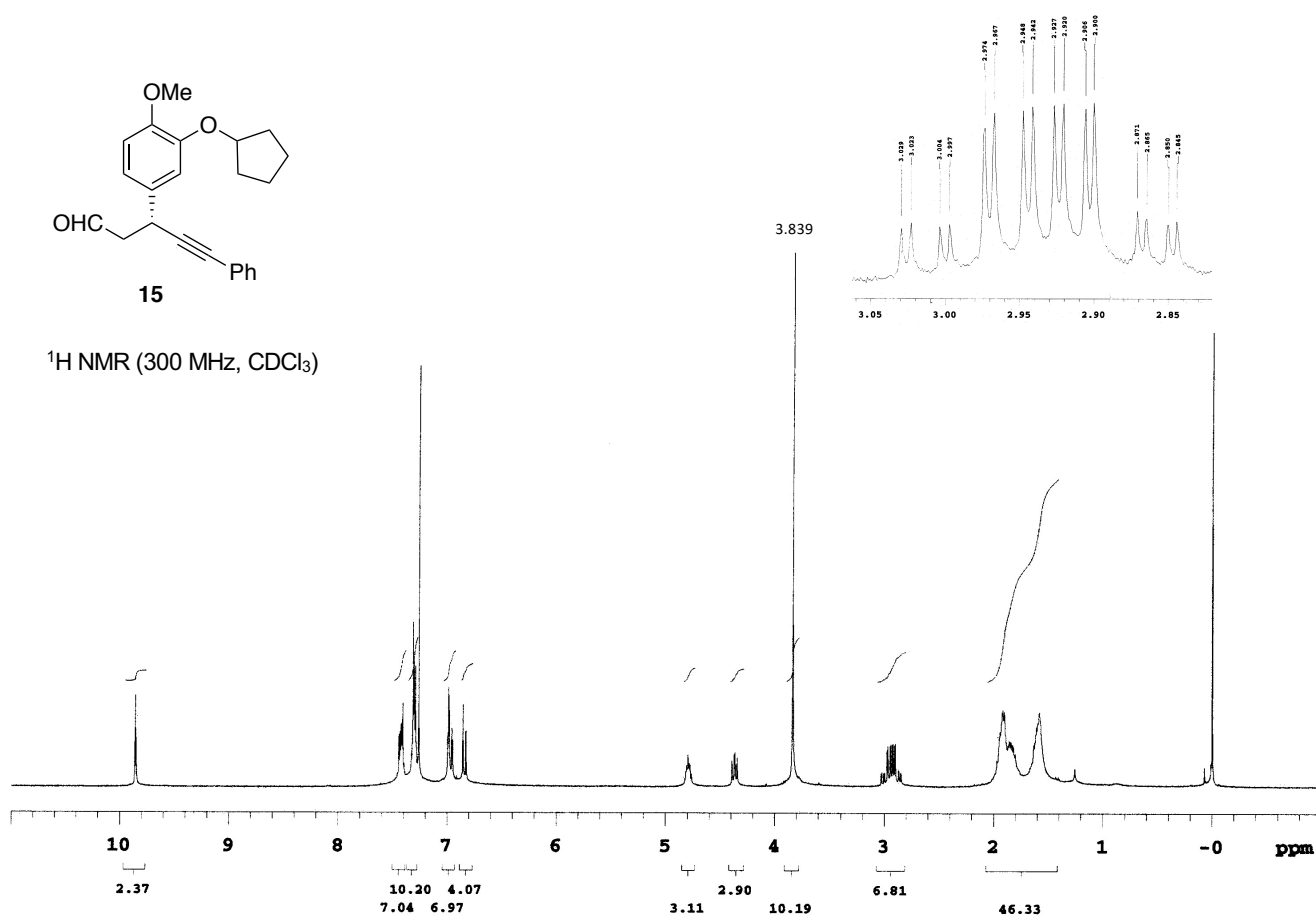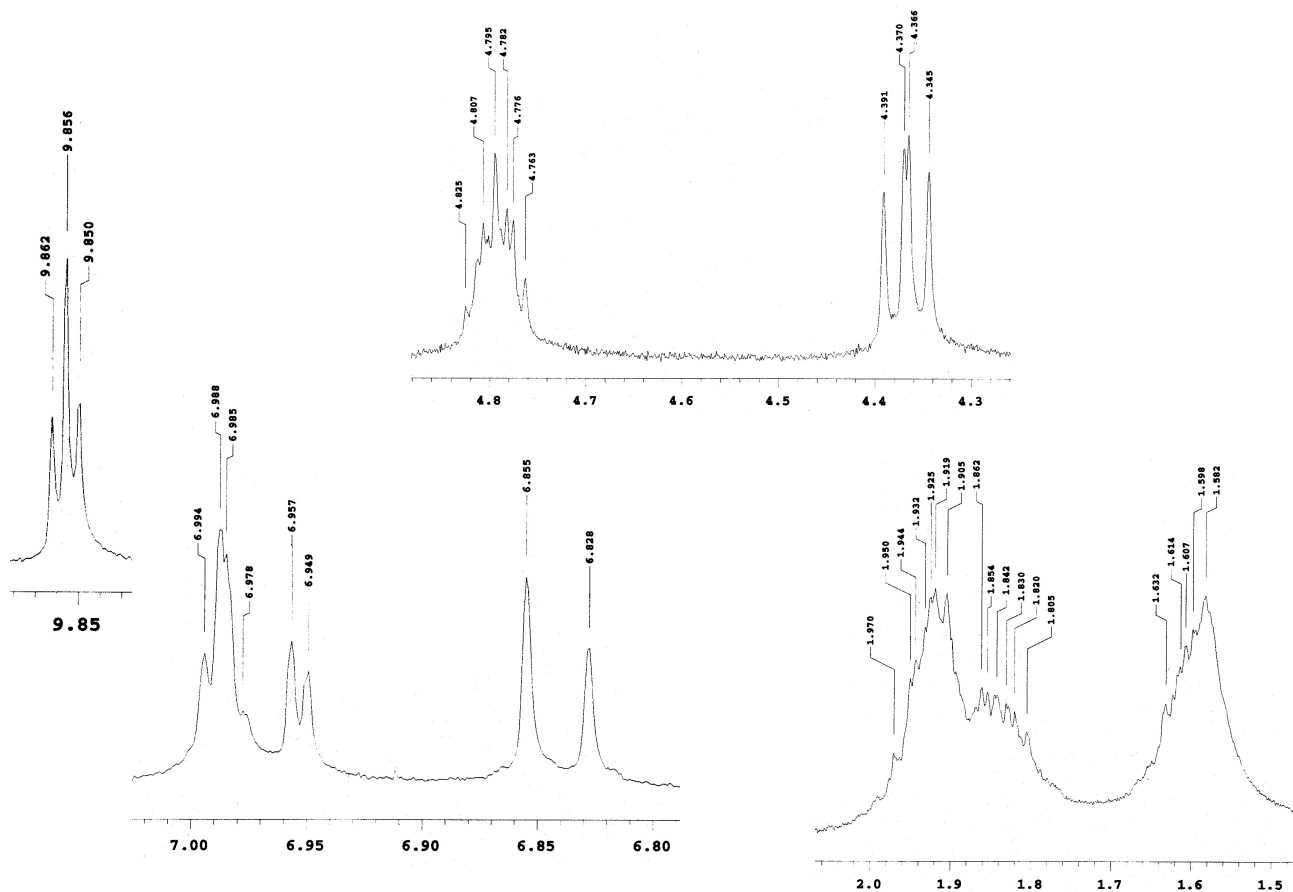

$^{13}\text{C}$  NMR (75 MHz,  $\text{CDCl}_3$ )

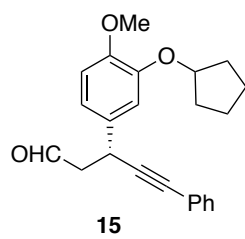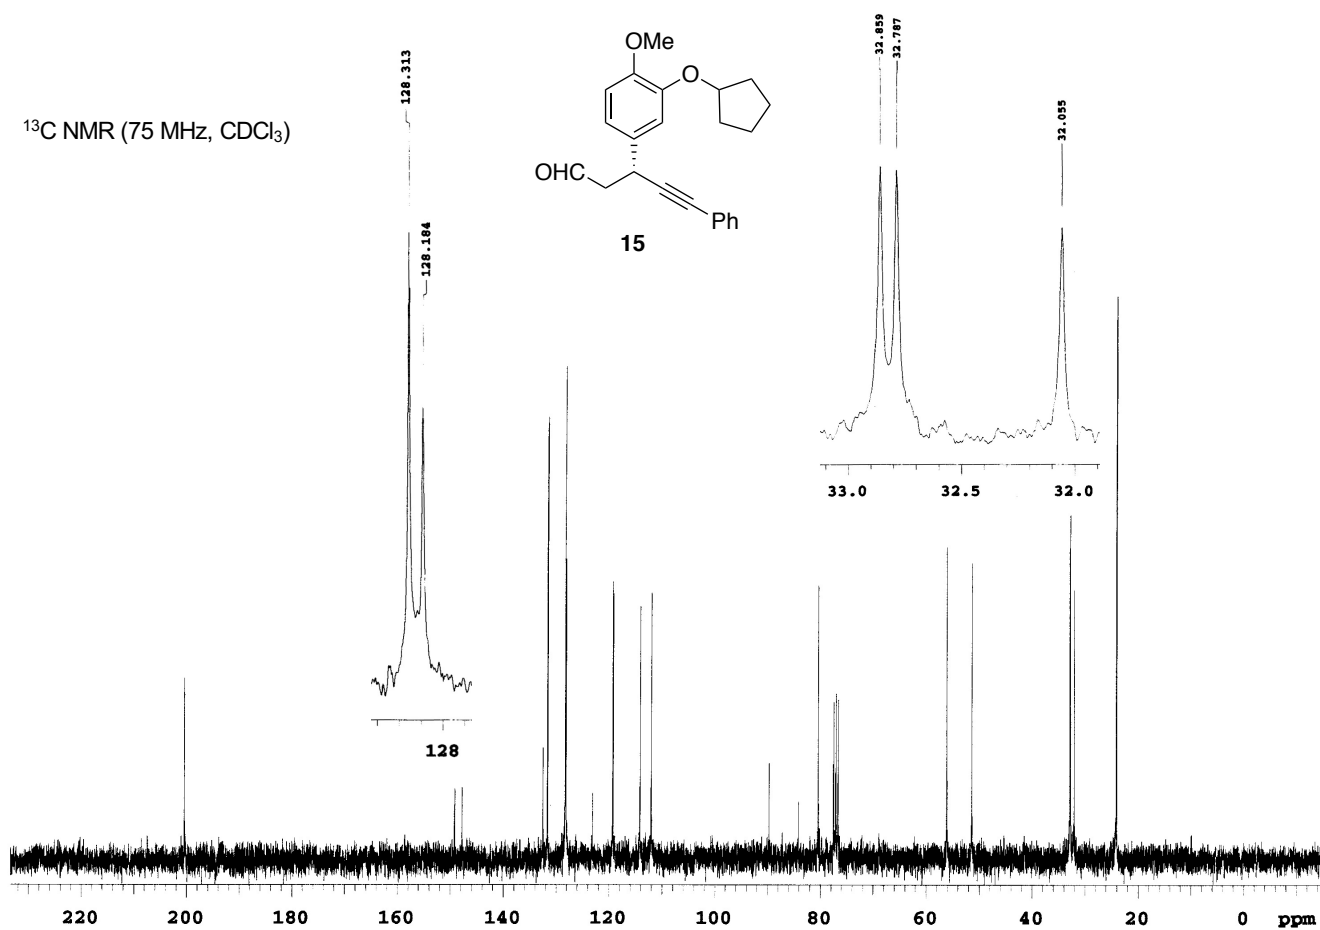

$^{13}\text{C}$ -APT NMR (75 MHz,  $\text{CDCl}_3$ )

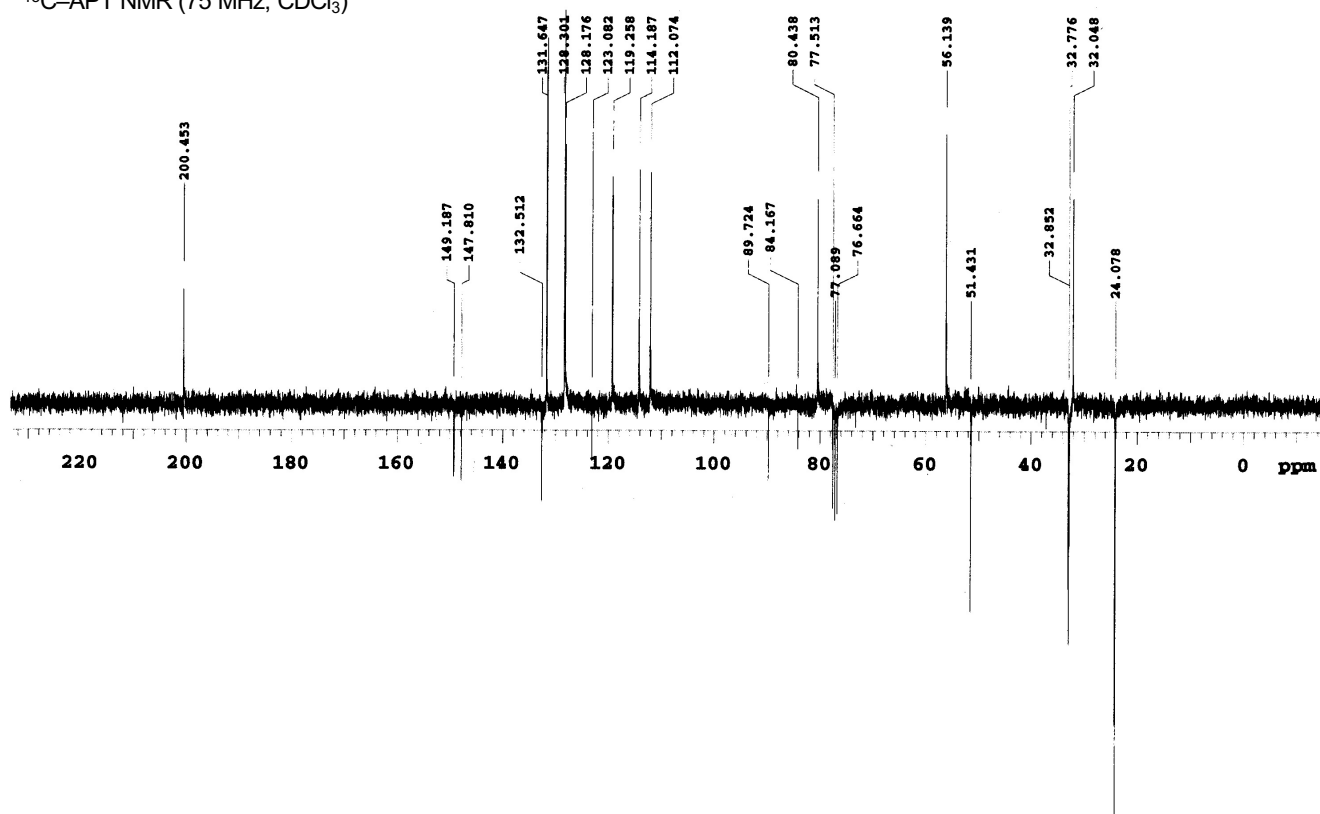

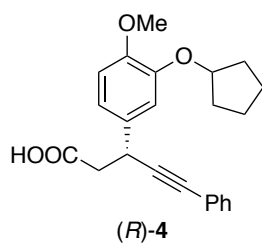

$^1\text{H}$  NMR (300 MHz,  $\text{CDCl}_3$ )

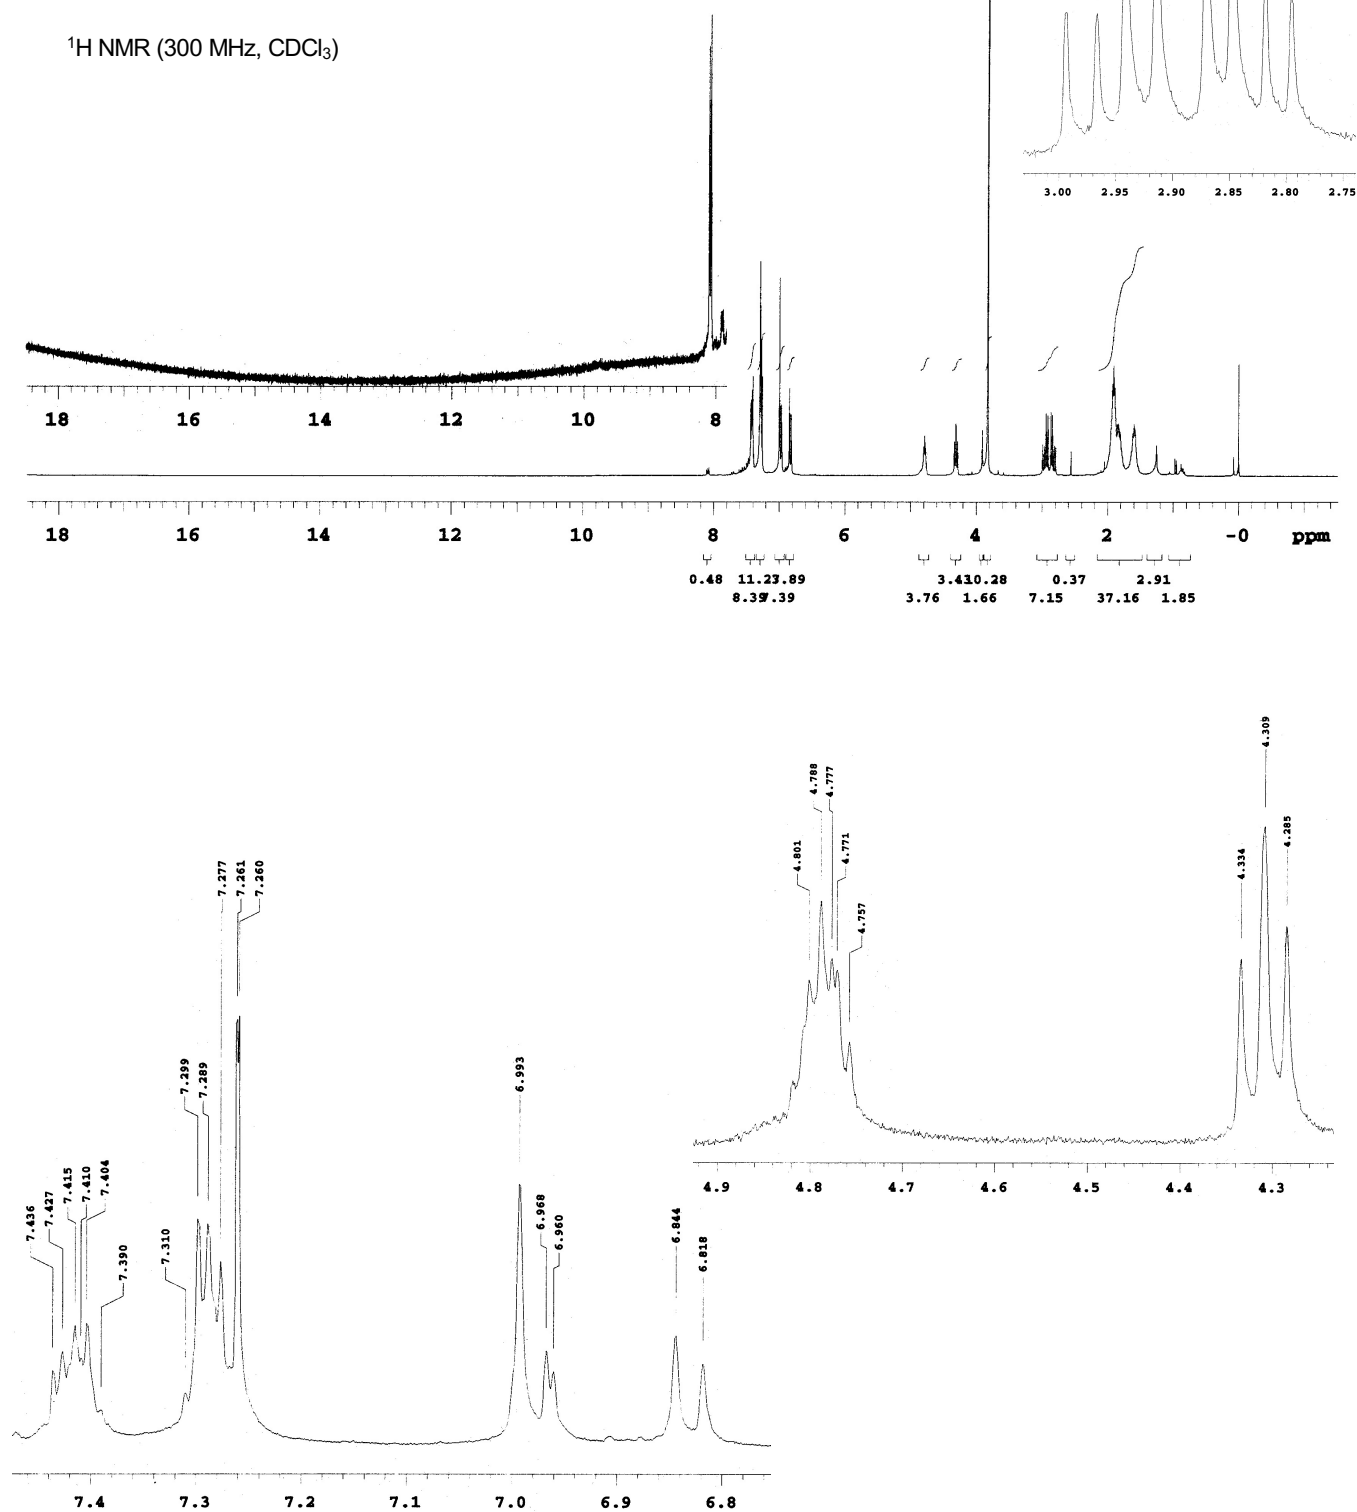

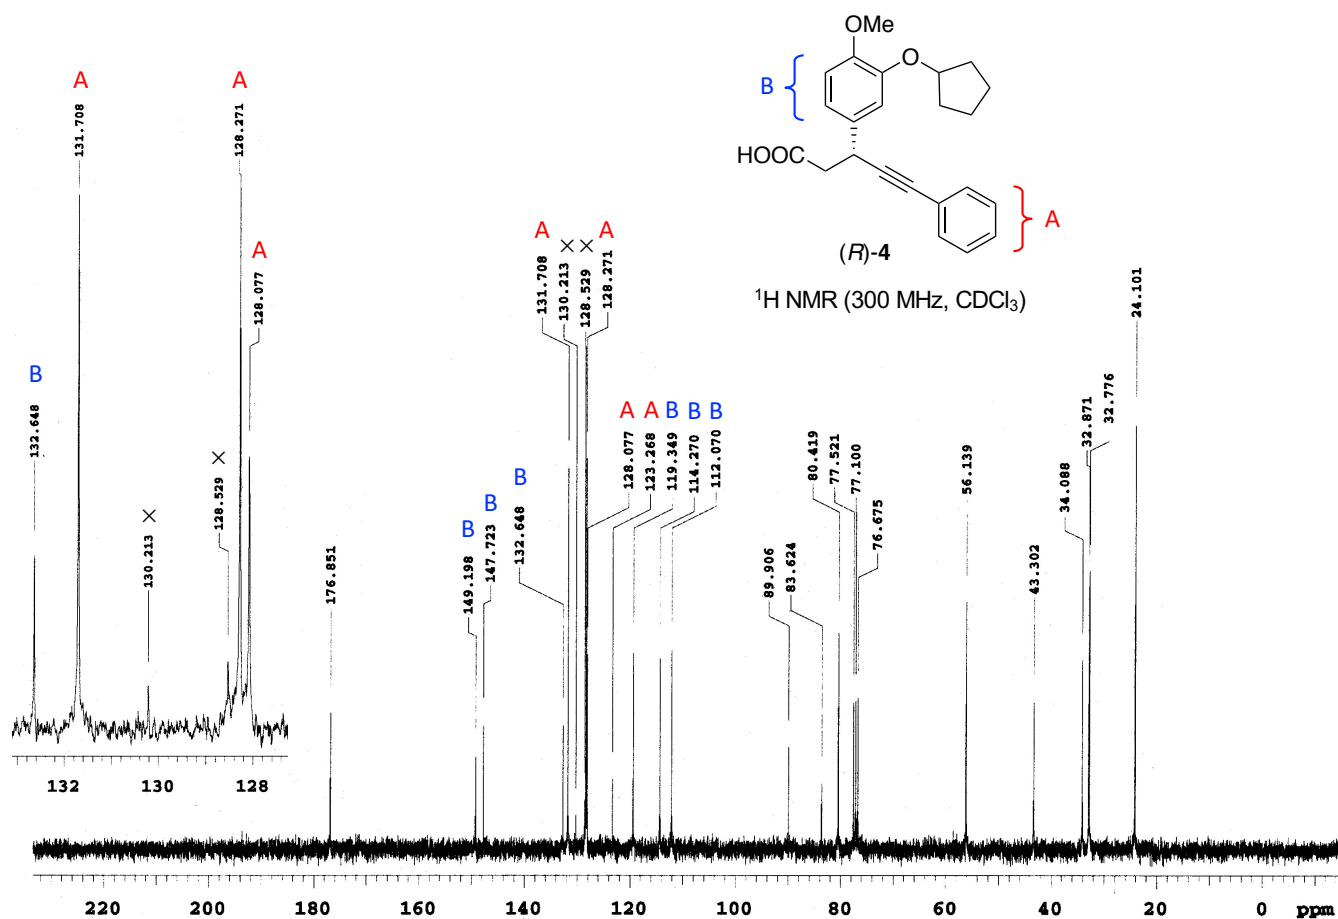

**<sup>13</sup>C-APT NMR (75 MHz, CDCl<sub>3</sub>)**

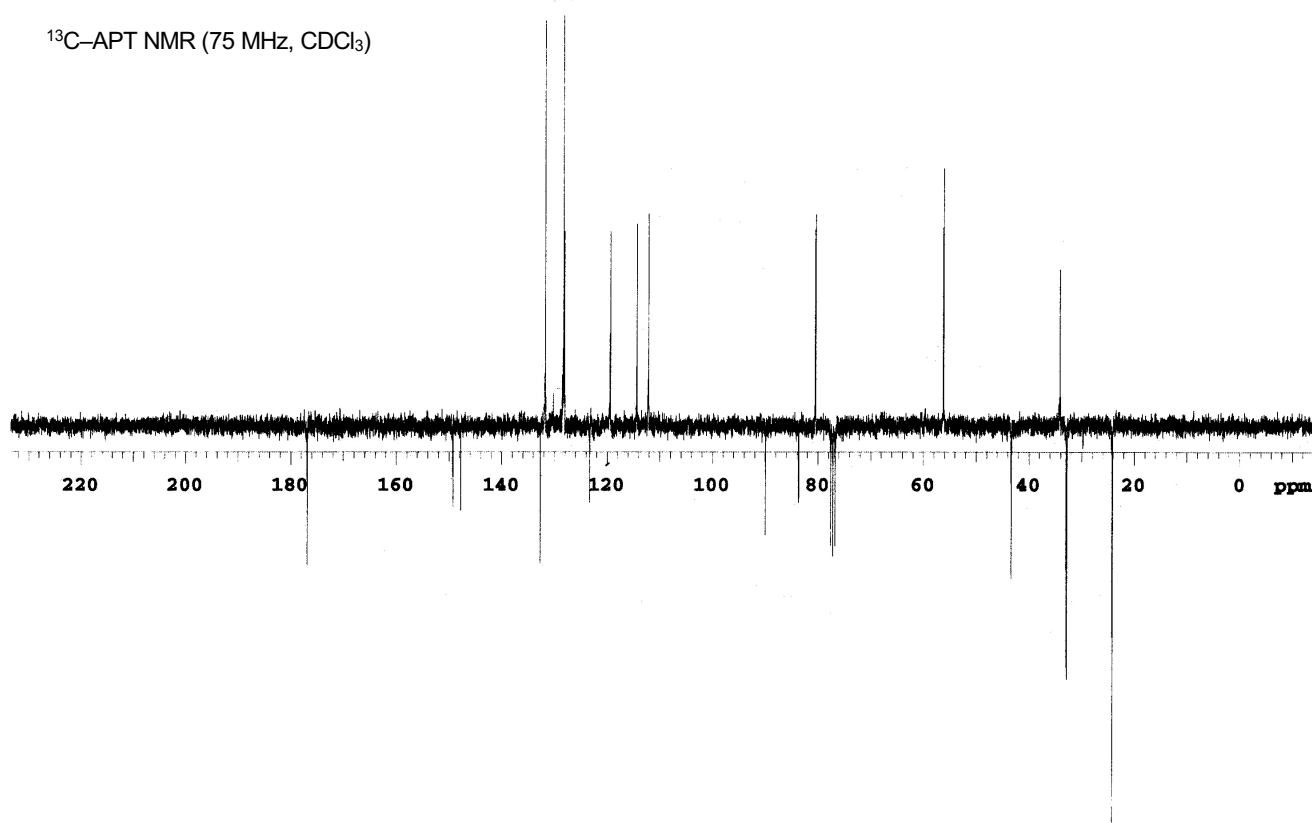

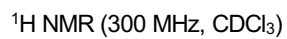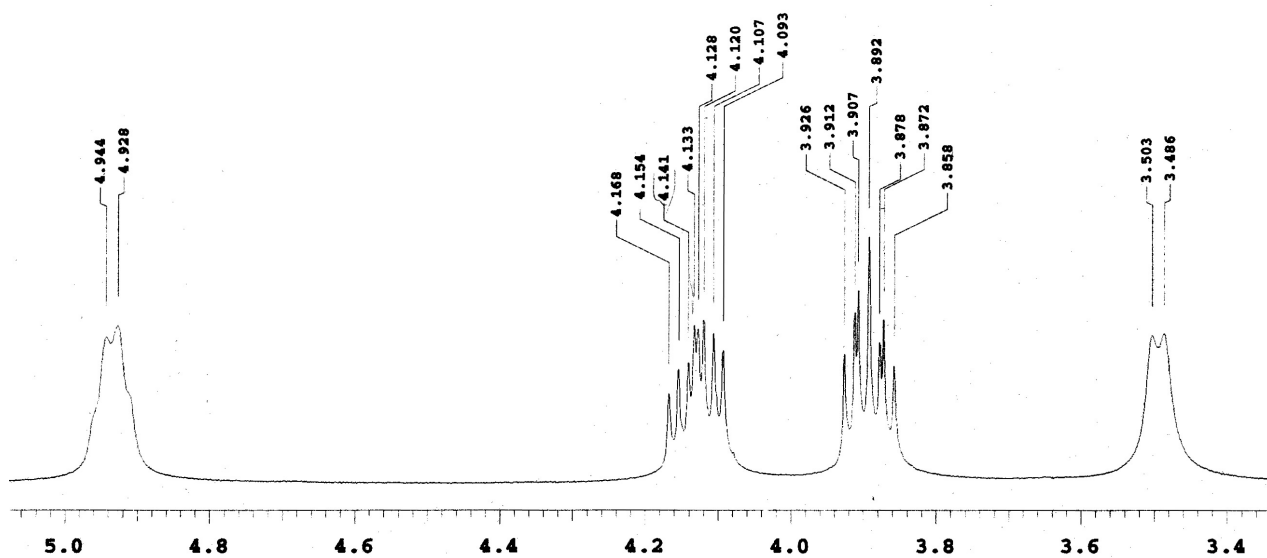

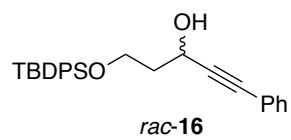

$^{13}\text{C}$  NMR (75 MHz,  $\text{CDCl}_3$ )

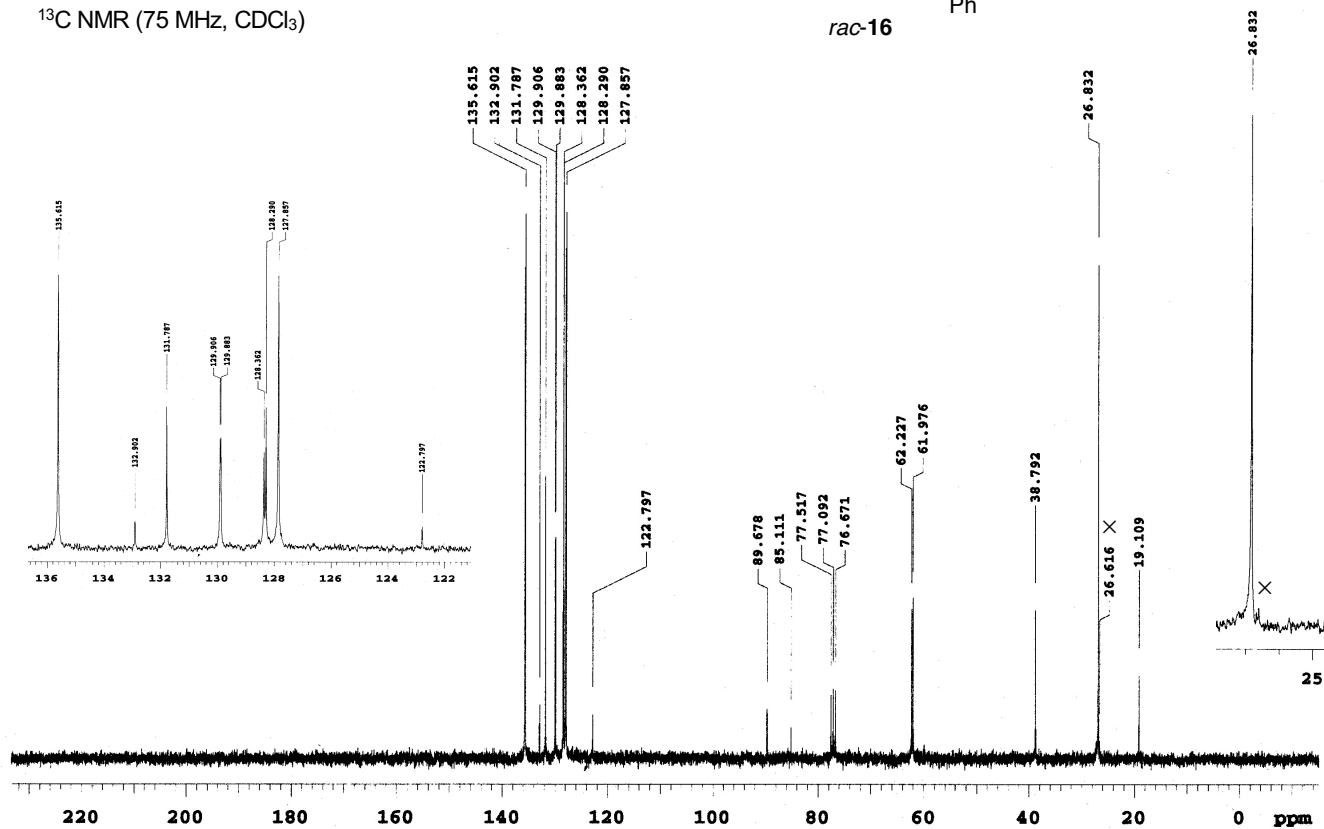

$^{13}\text{C}$ -APT NMR (75 MHz,  $\text{CDCl}_3$ )

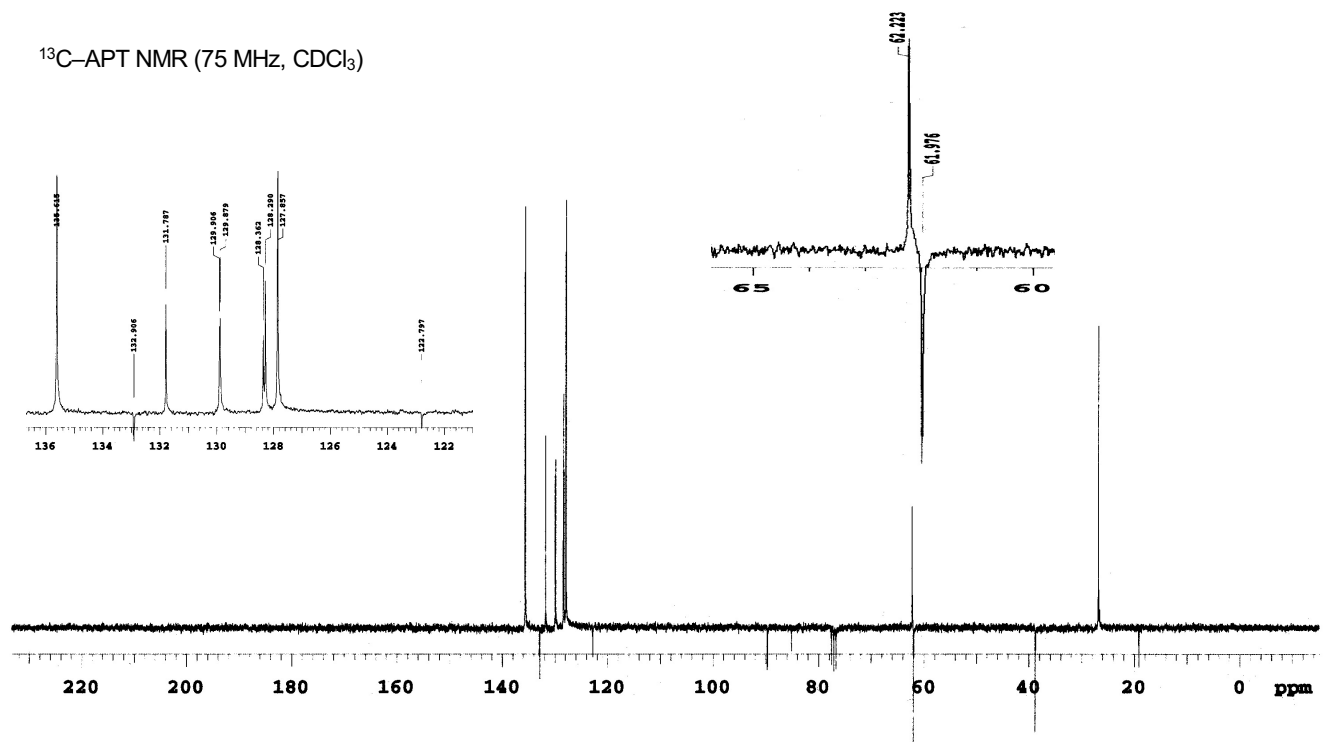

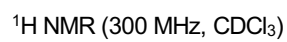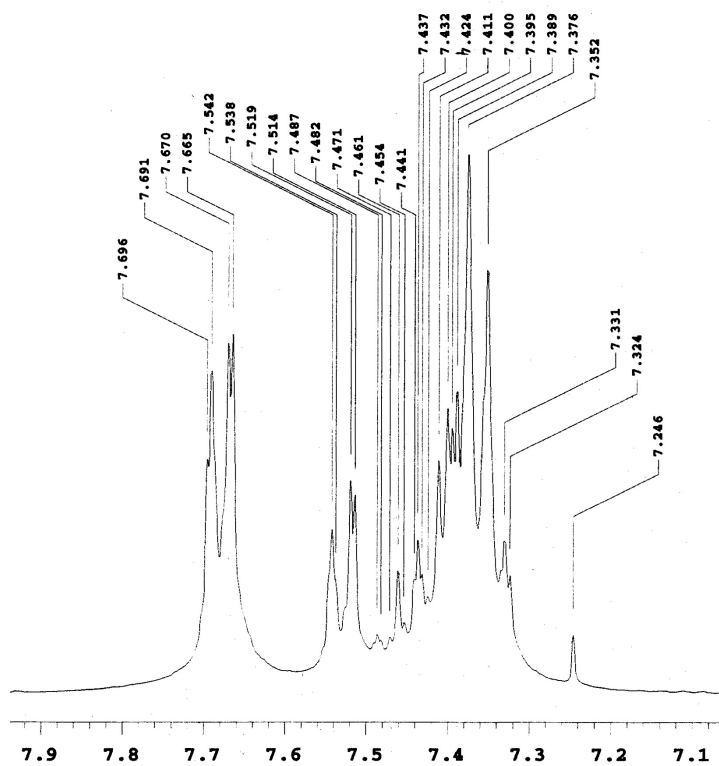

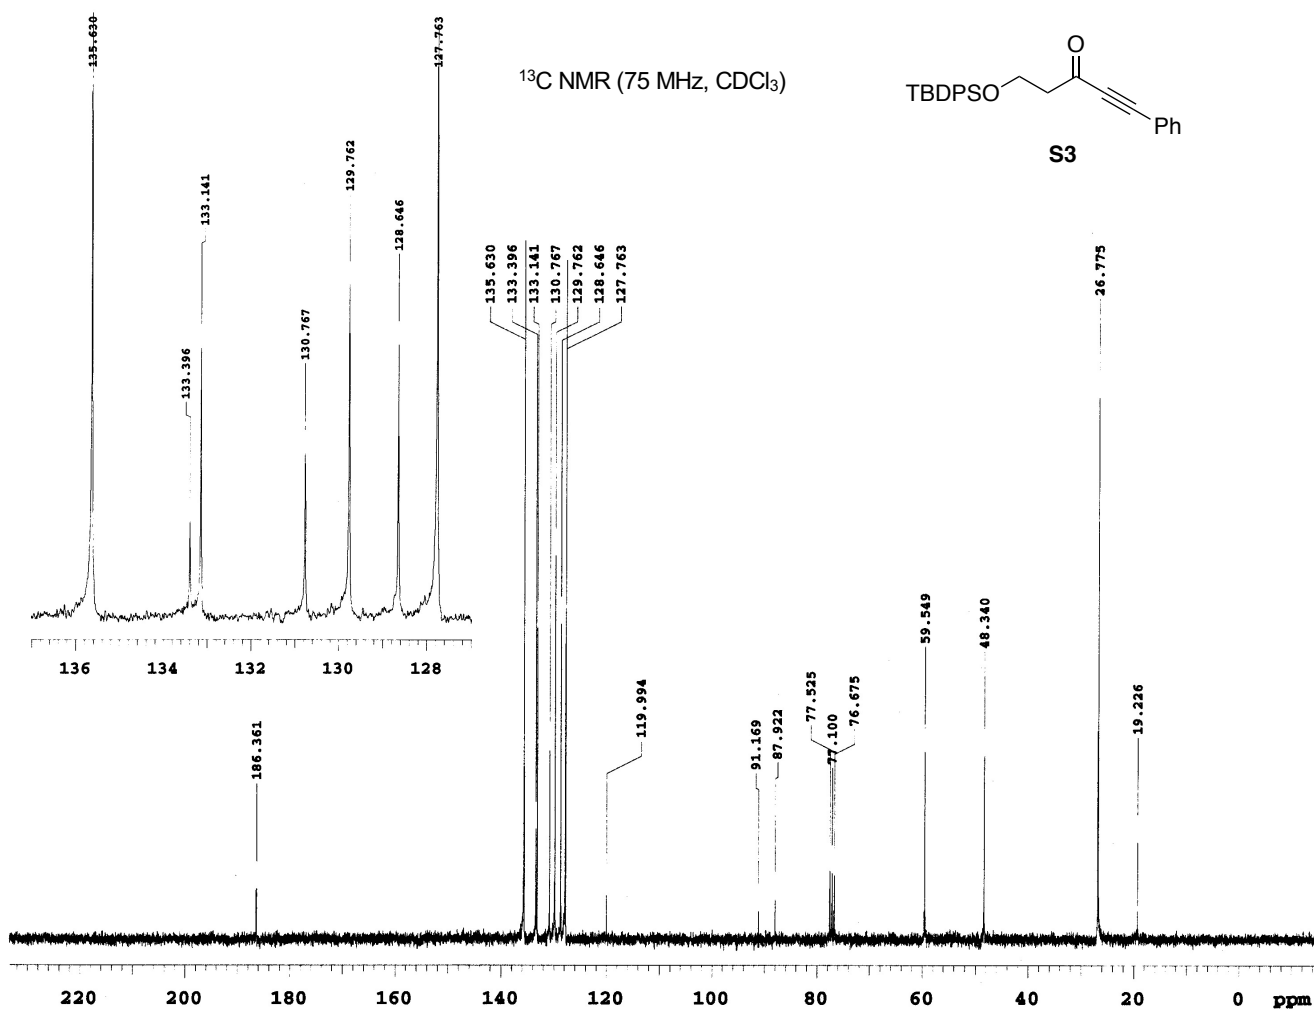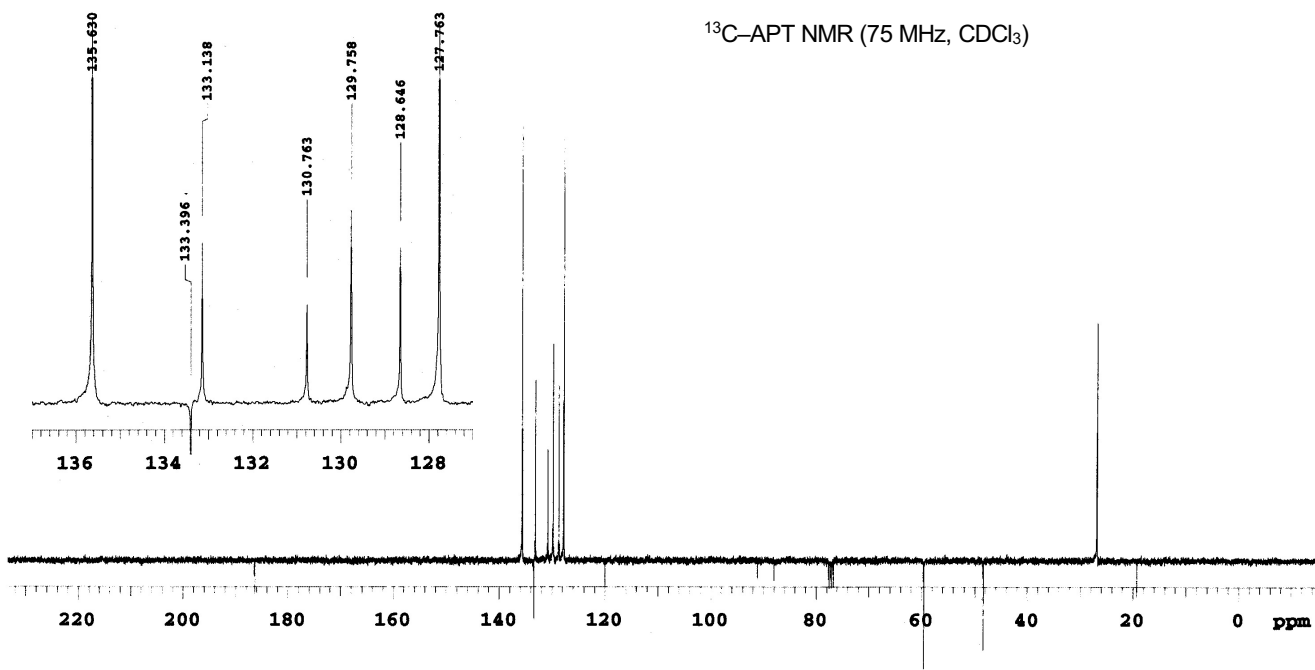



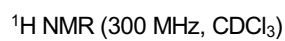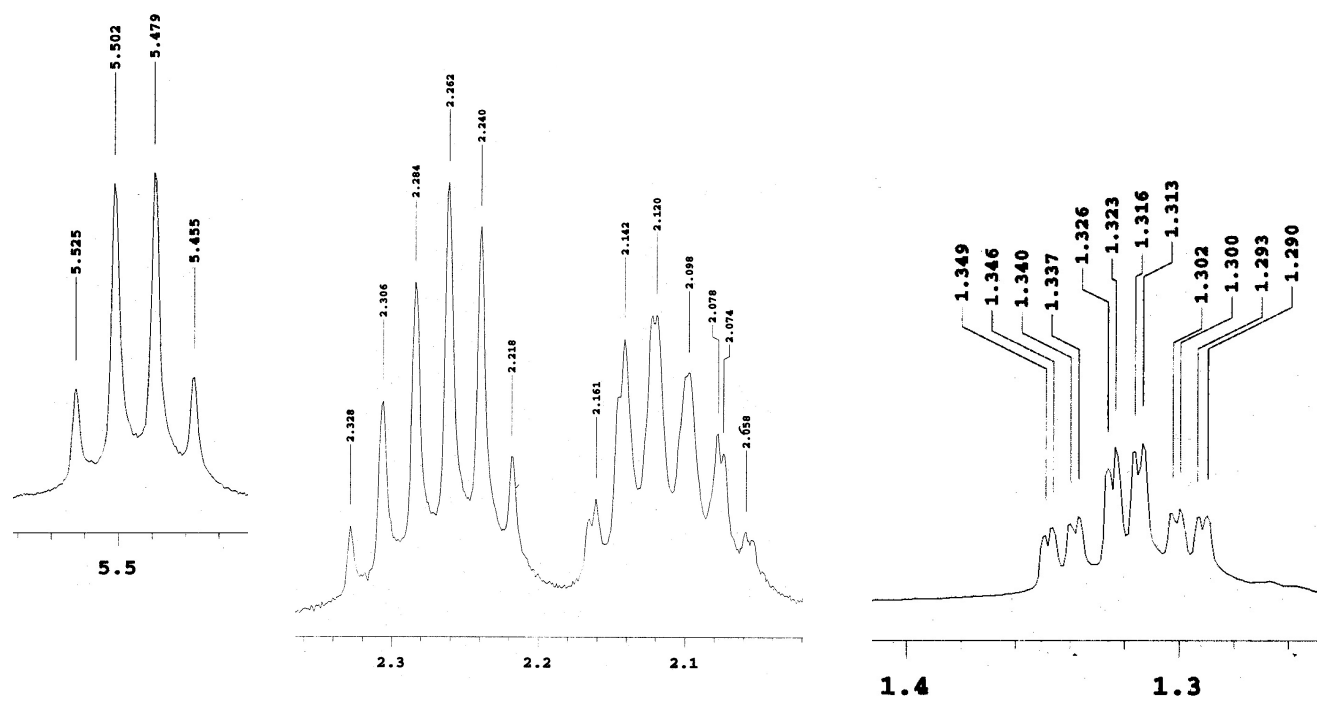

$^{13}\text{C}$  NMR (75 MHz,  $\text{CDCl}_3$ )

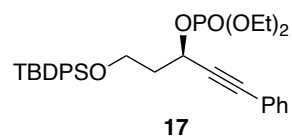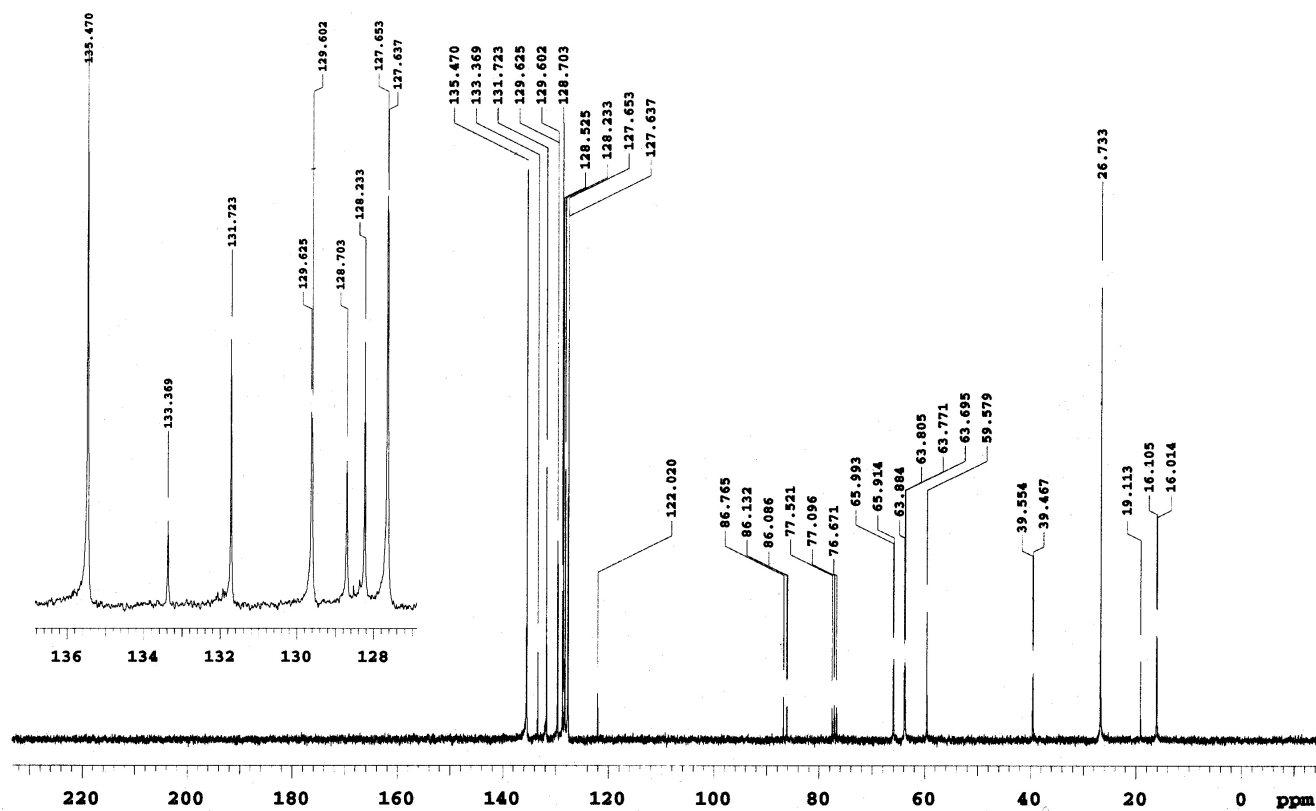

$^{13}\text{C}$ -APT NMR (75 MHz,  $\text{CDCl}_3$ )

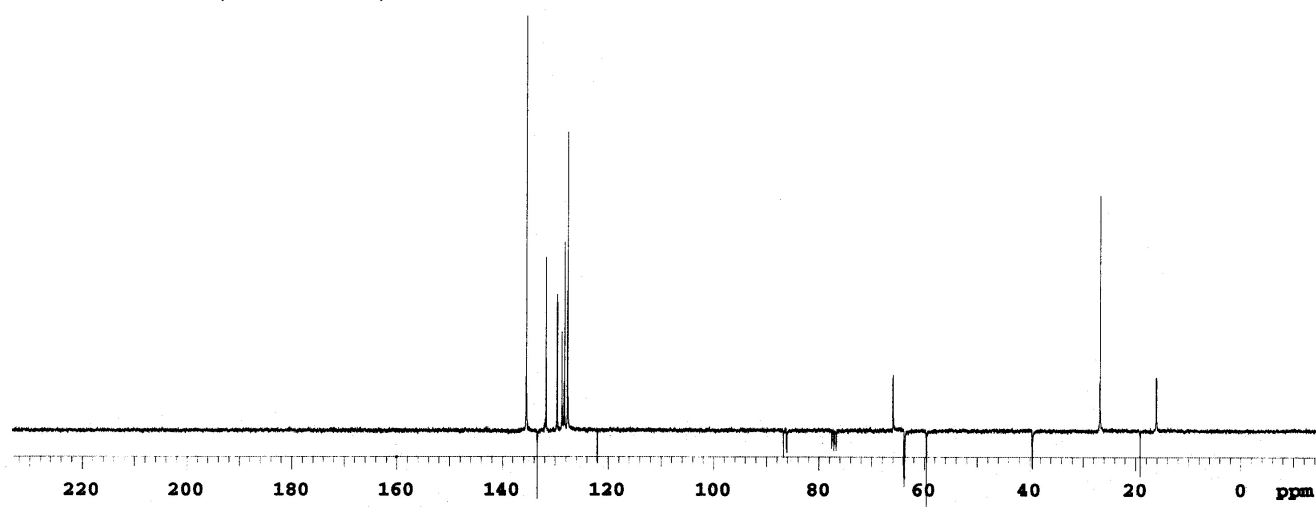

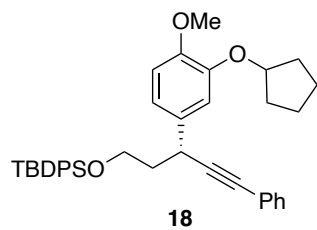

$^1\text{H}$  NMR (300 MHz,  $\text{CDCl}_3$ )

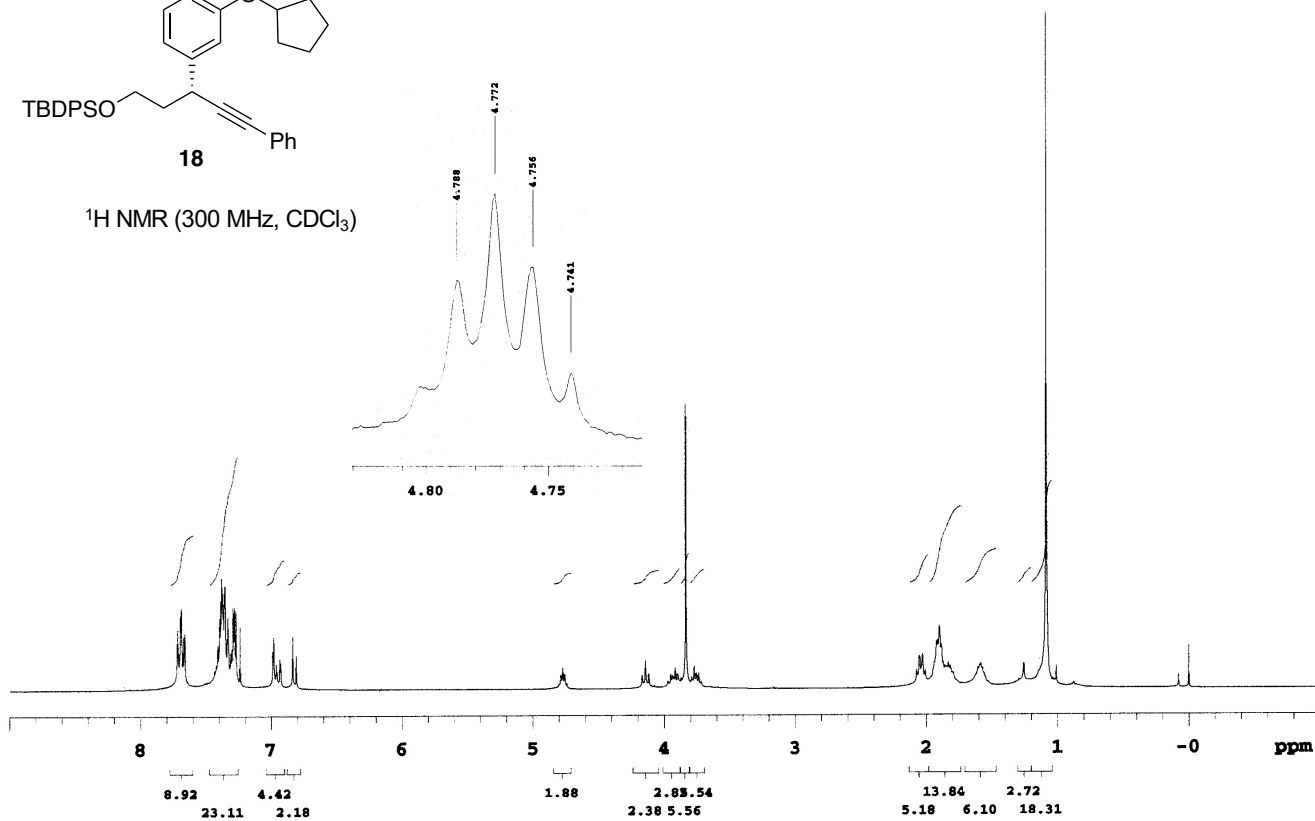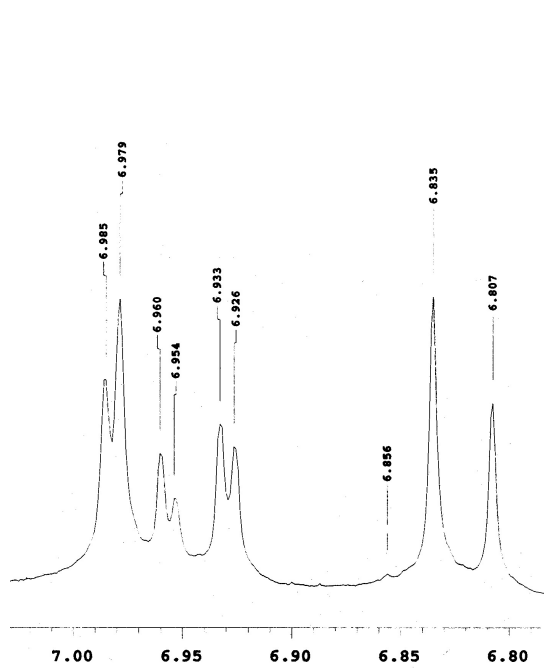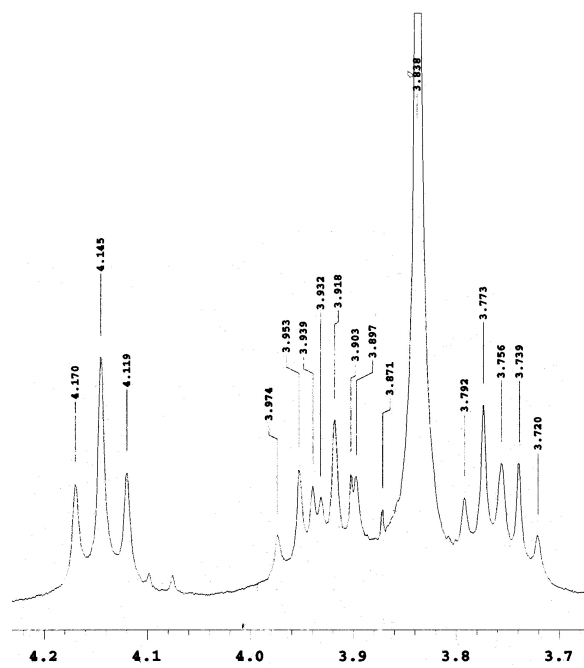

**18**

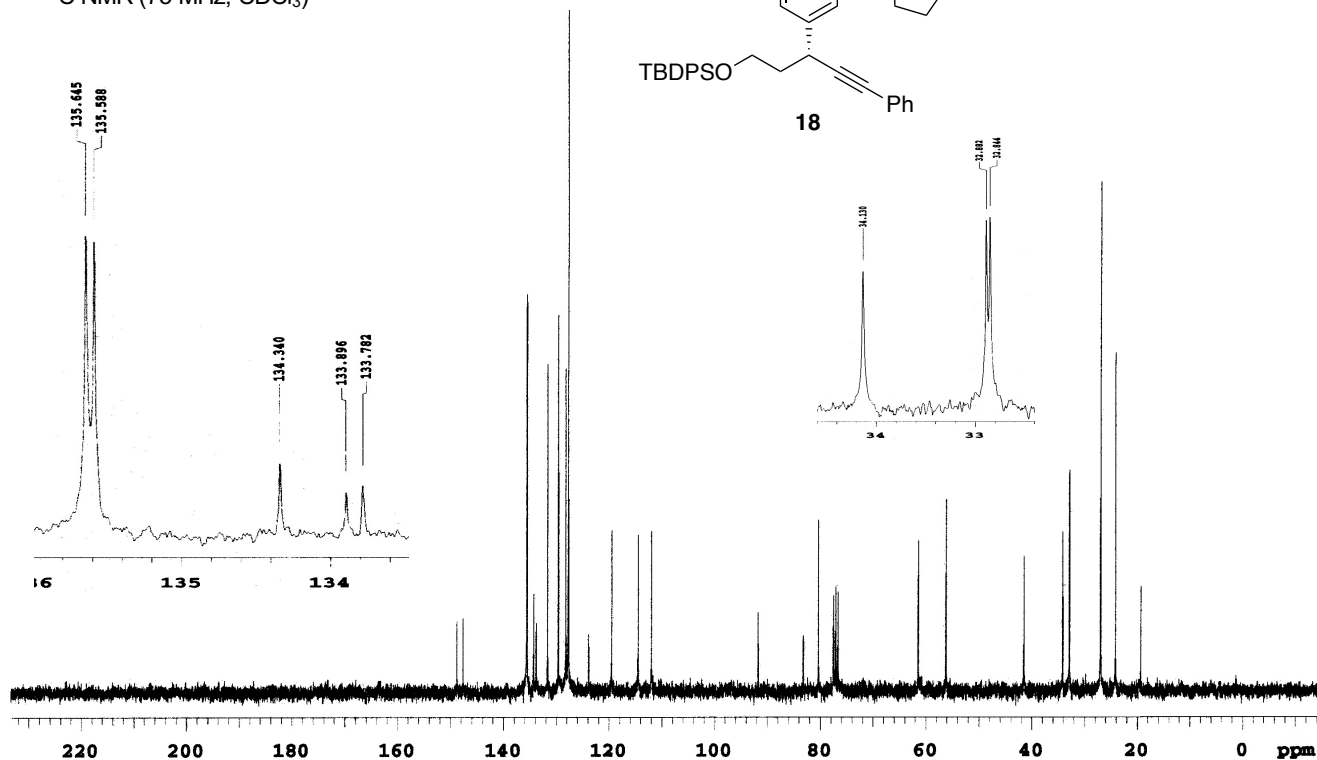

<sup>13</sup>C-APT NMR (75 MHz, CDCl<sub>3</sub>)

Chemical shift values (ppm): 146.789, 147.647, 135.645, 135.588, 134.340, 133.896, 133.782, 131.685, 128.640, 128.222, 127.751, 127.713, 123.814, 119.482, 114.509, 111.971, 91.700, 83.184, 80.358, 77.521, 76.875, 61.426, 41.516, 34.130, 32.882, 32.844, 26.942, 24.124, 19.348.

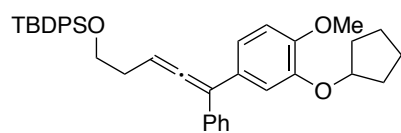

19

$^1\text{H}$  NMR (300 MHz,  $\text{CDCl}_3$ )

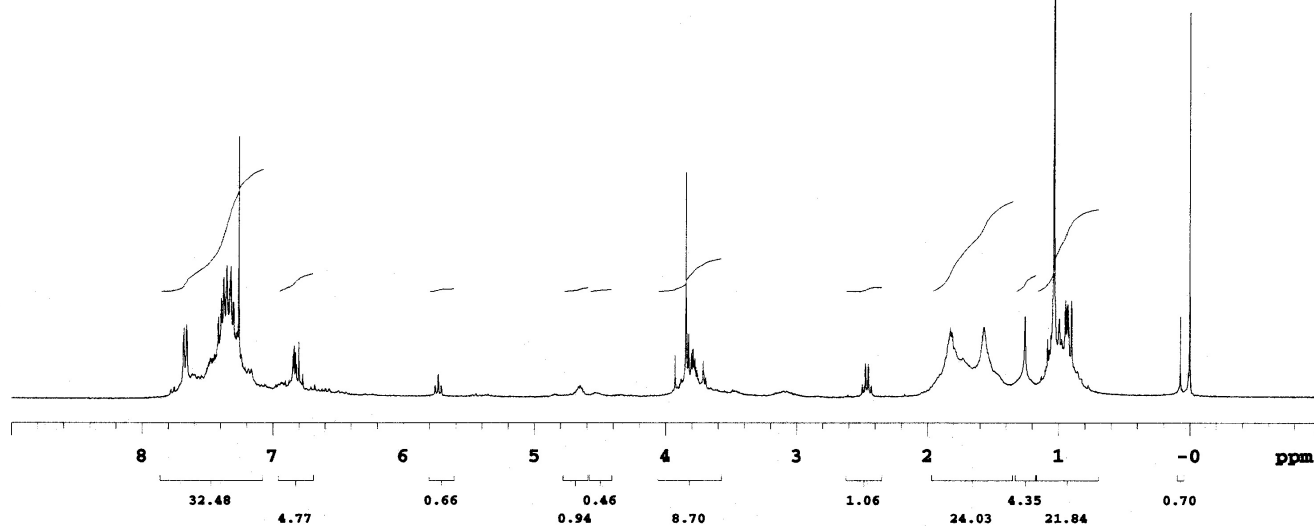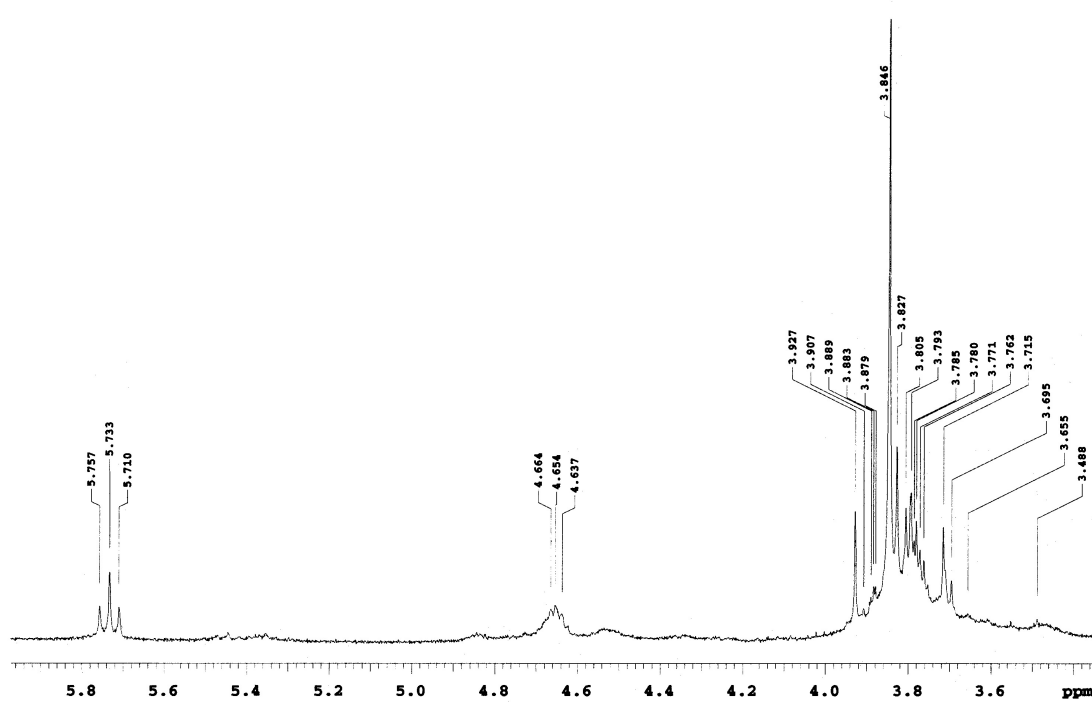

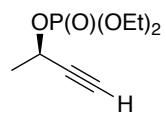

phosphate  
derived from **22**

$^1\text{H}$  NMR (300 MHz,  $\text{CDCl}_3$ )

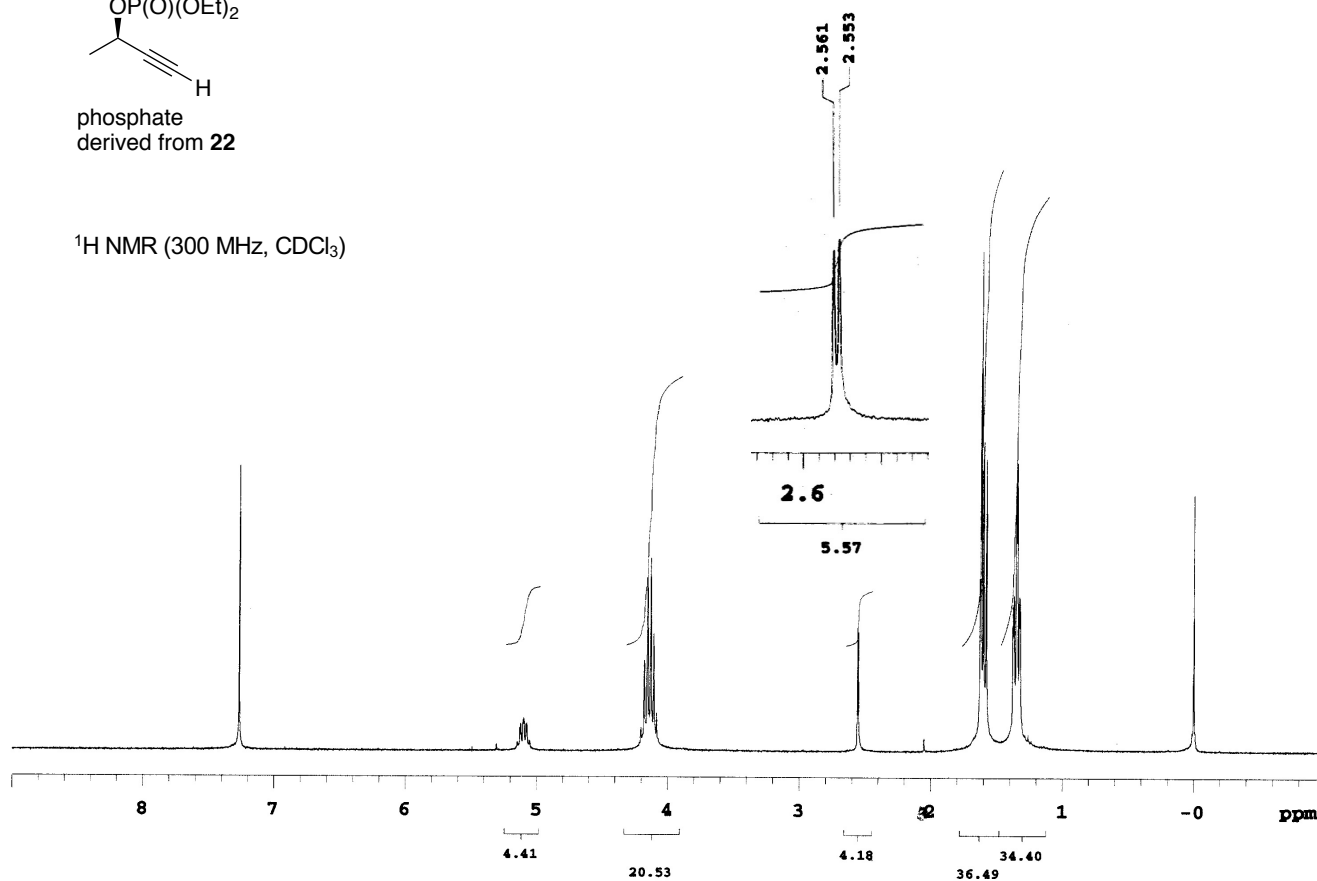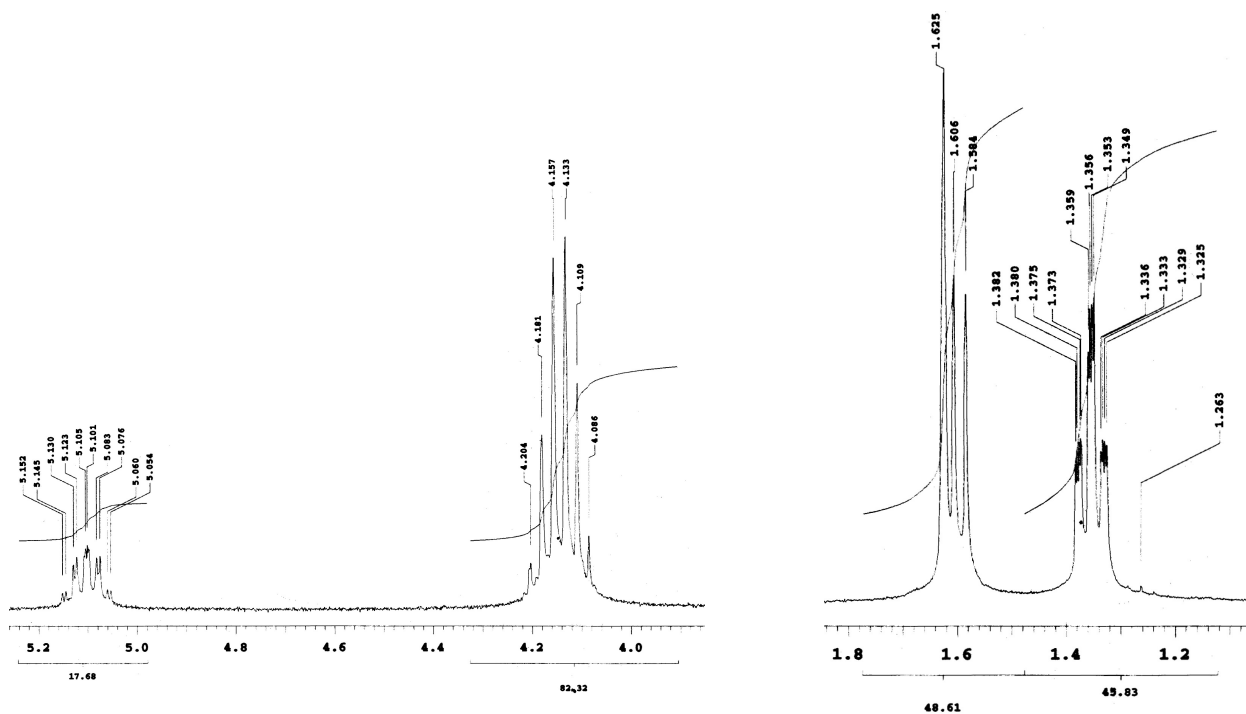

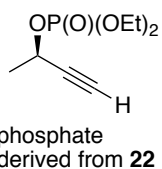

$^{13}\text{C}$  NMR (75 MHz,  $\text{CDCl}_3$ )

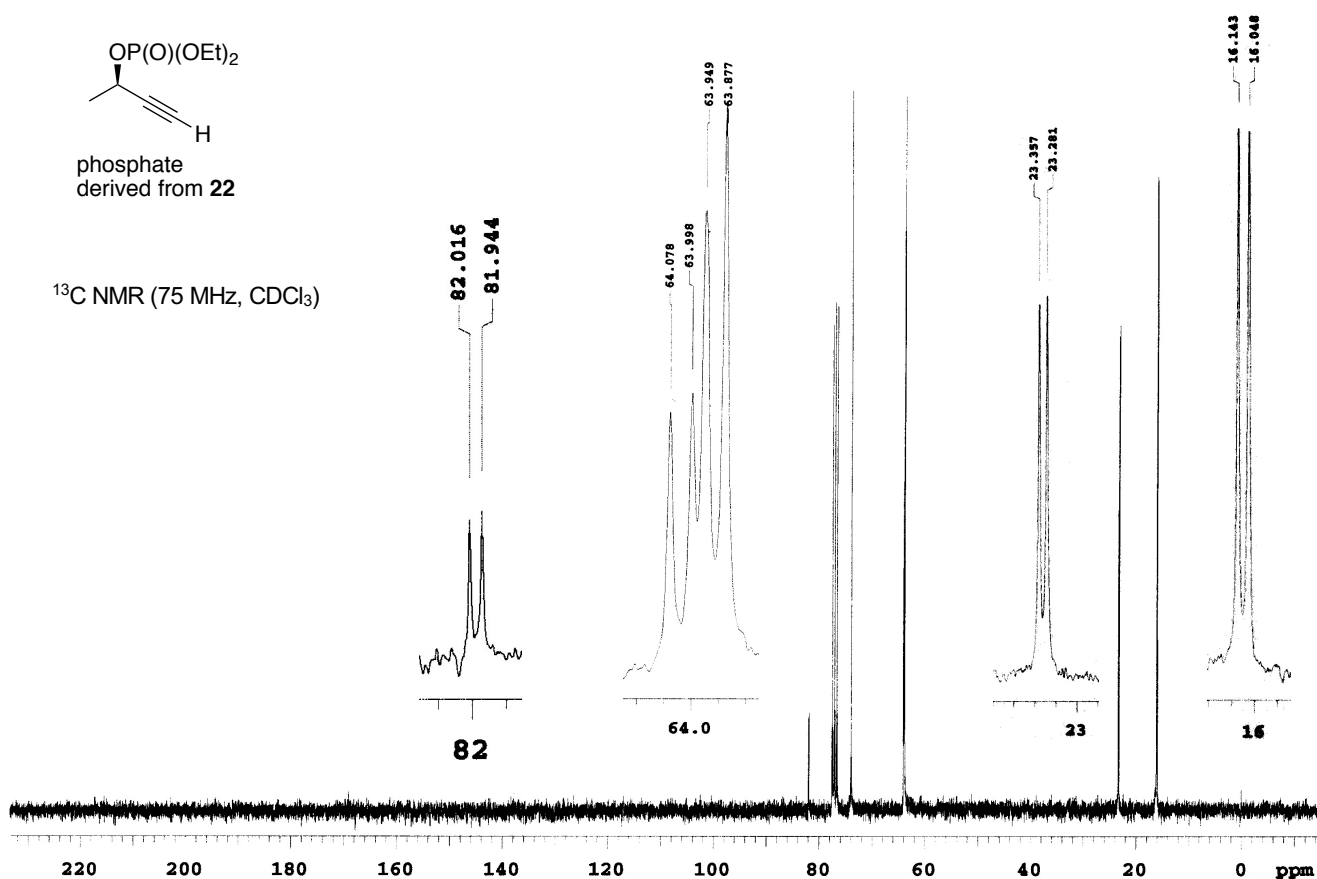

$^{13}\text{C}$ -APT NMR (75 MHz,  $\text{CDCl}_3$ )

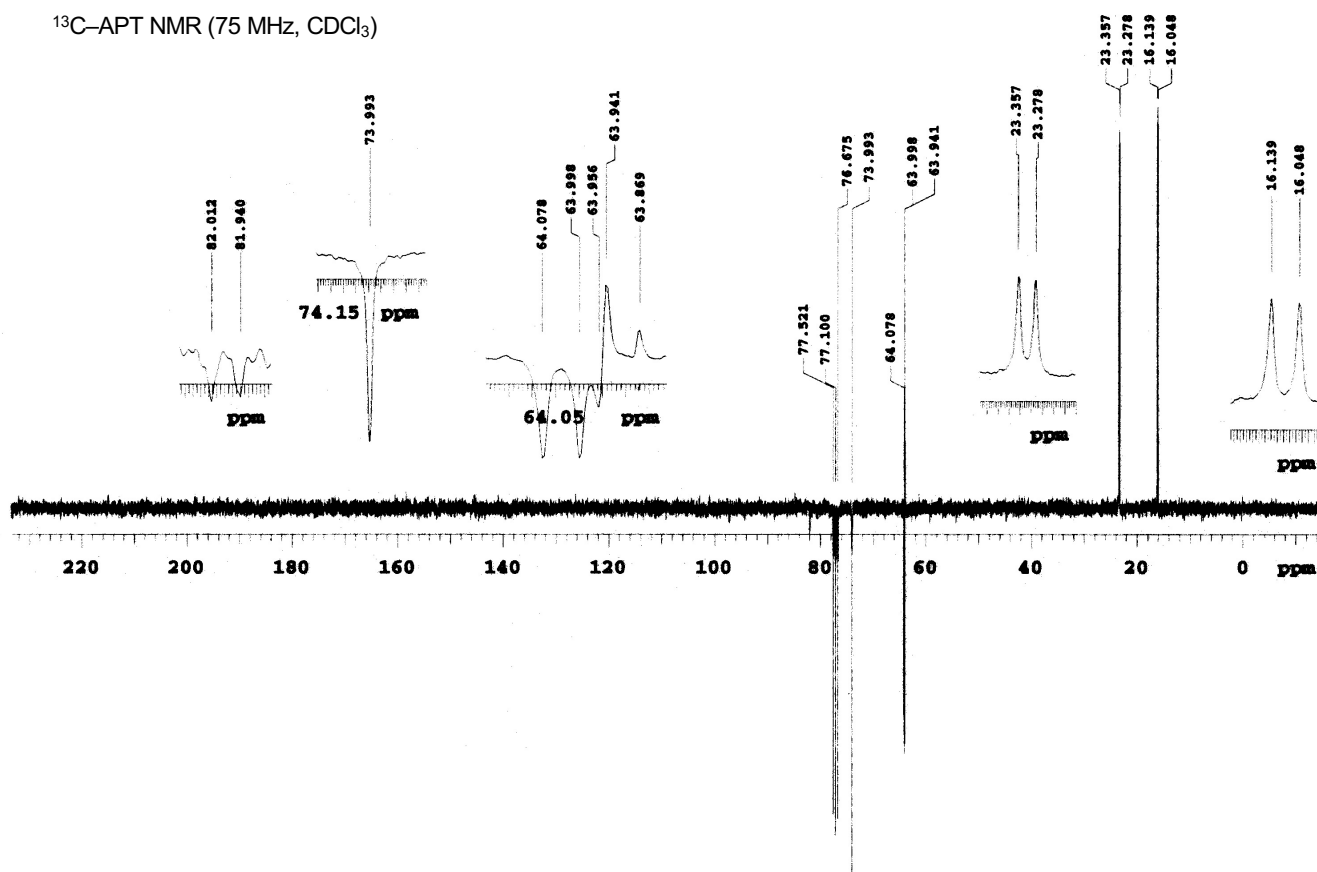

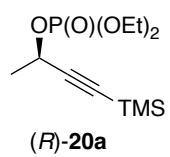

<sup>1</sup>H NMR (300 MHz, CDCl<sub>3</sub>)

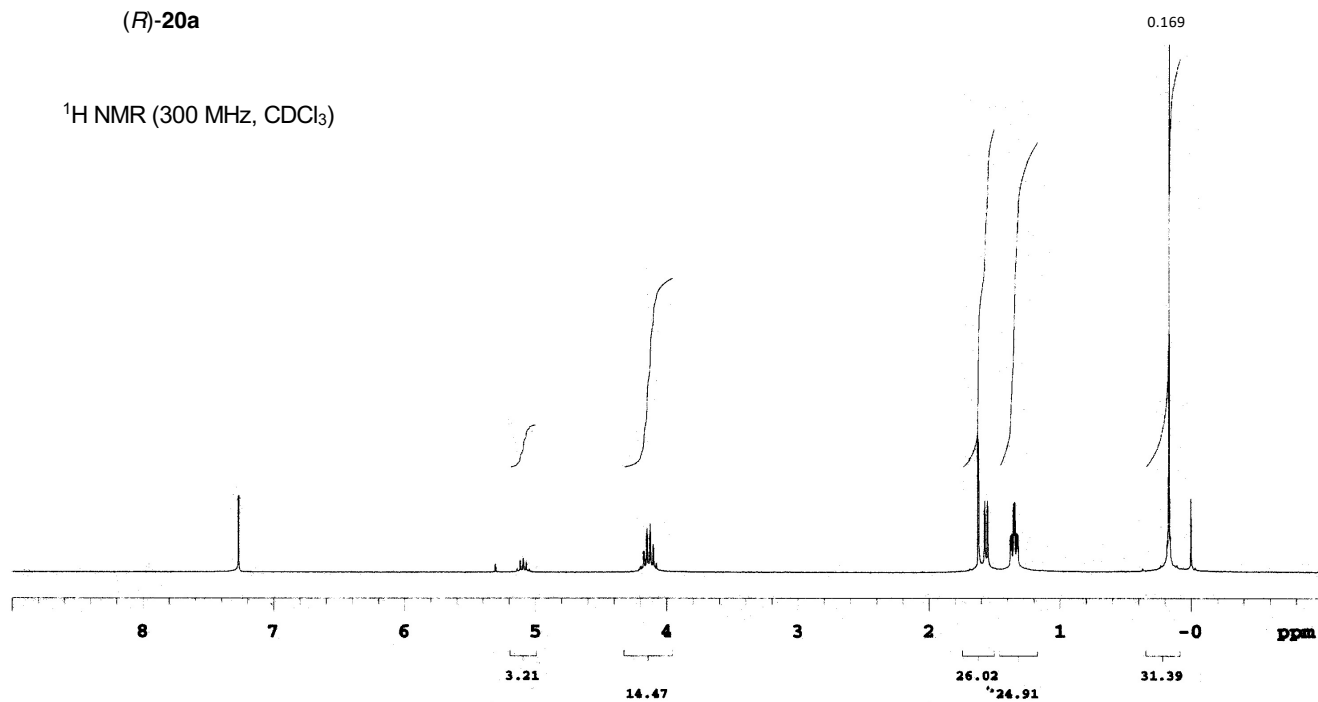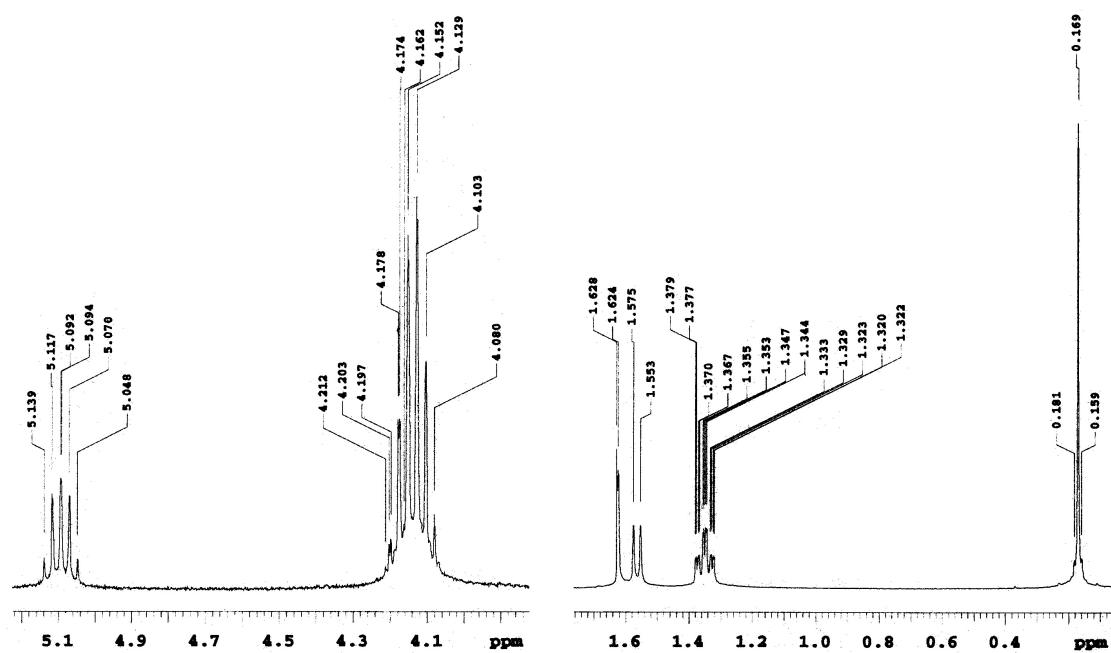



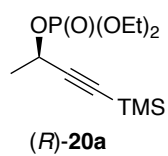

$^{13}\text{C}$  NMR (75 MHz,  $\text{CDCl}_3$ )

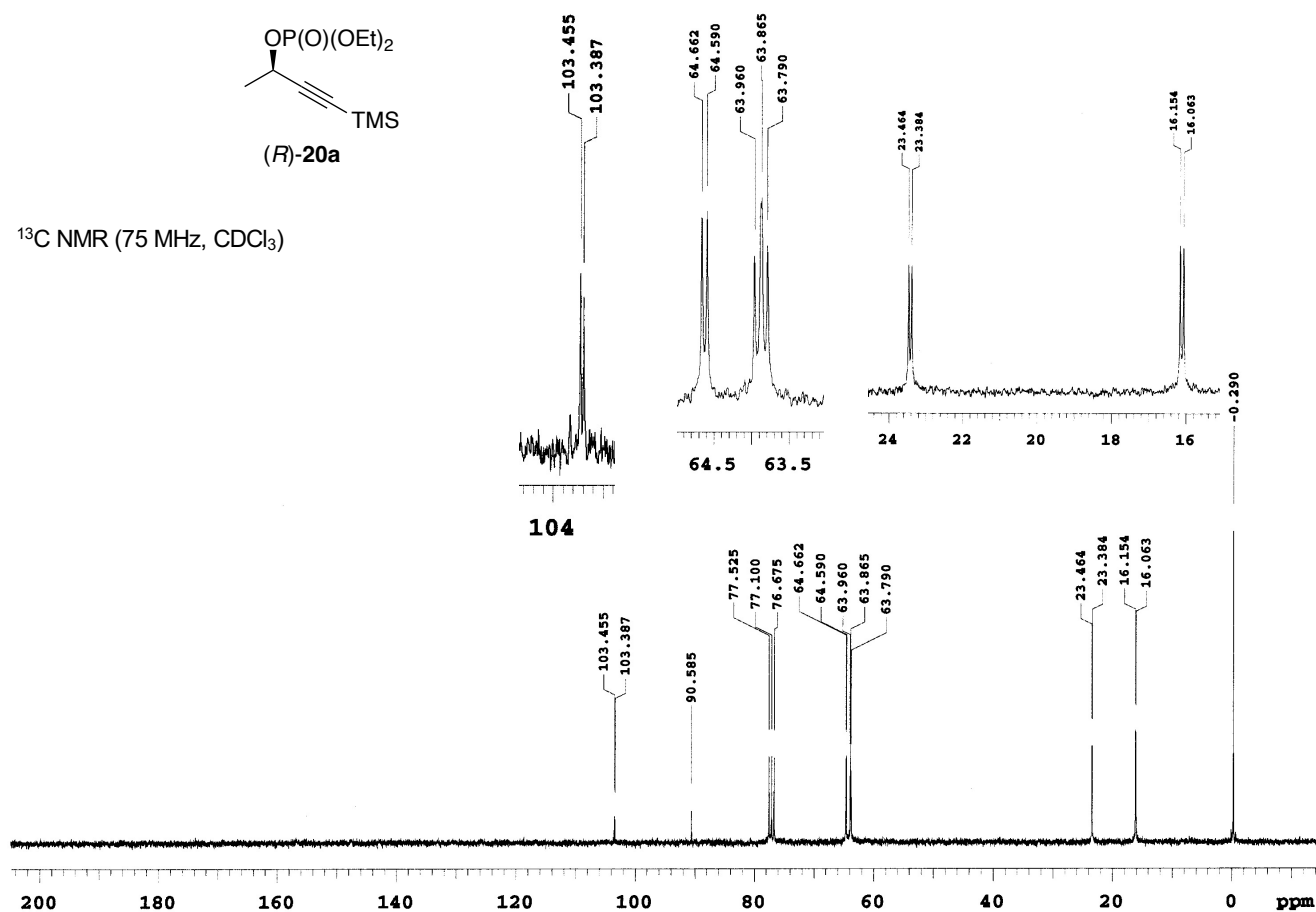

$^{13}\text{C}$ -APT NMR (75 MHz,  $\text{CDCl}_3$ )

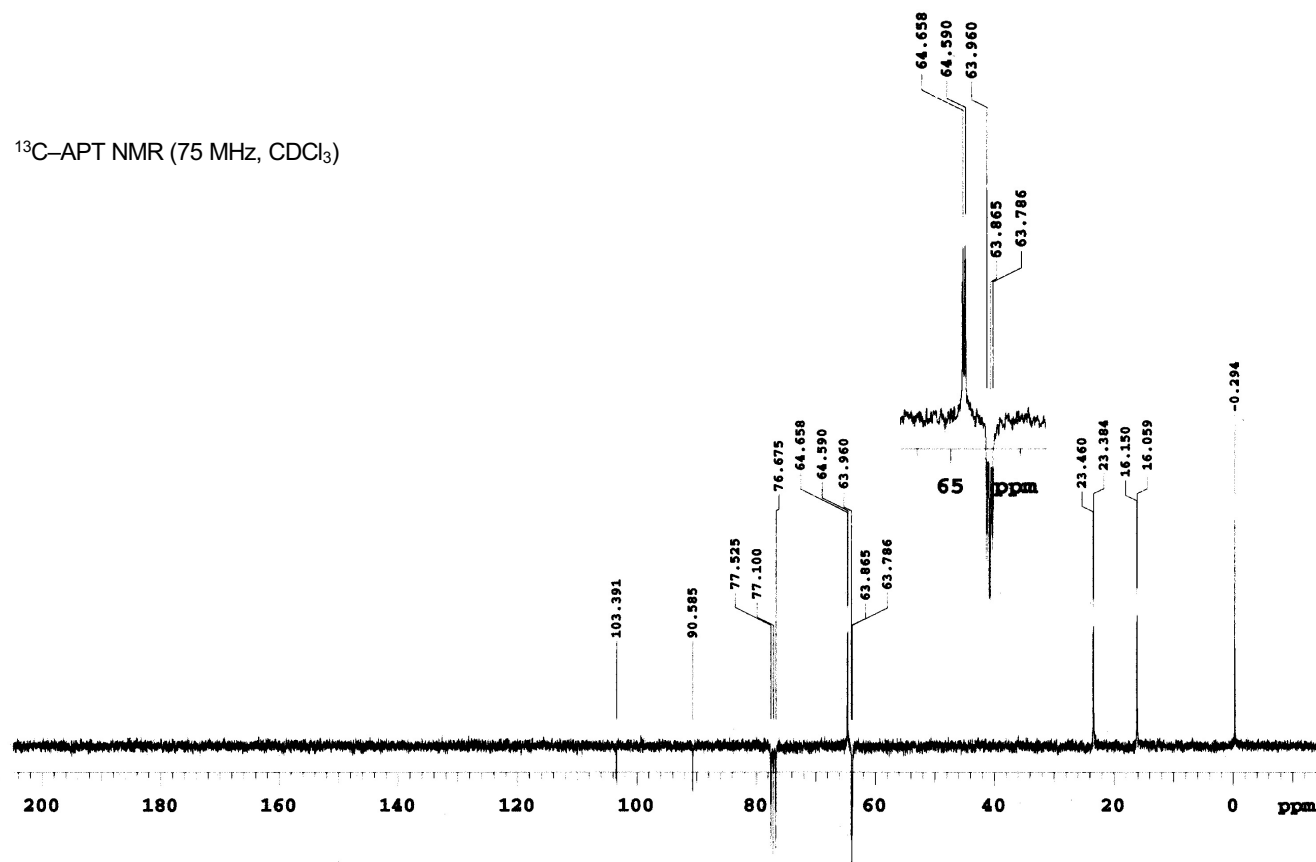

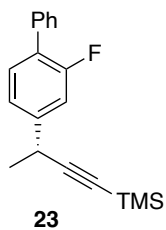

$^1\text{H}$  NMR (300 MHz,  $\text{CDCl}_3$ )

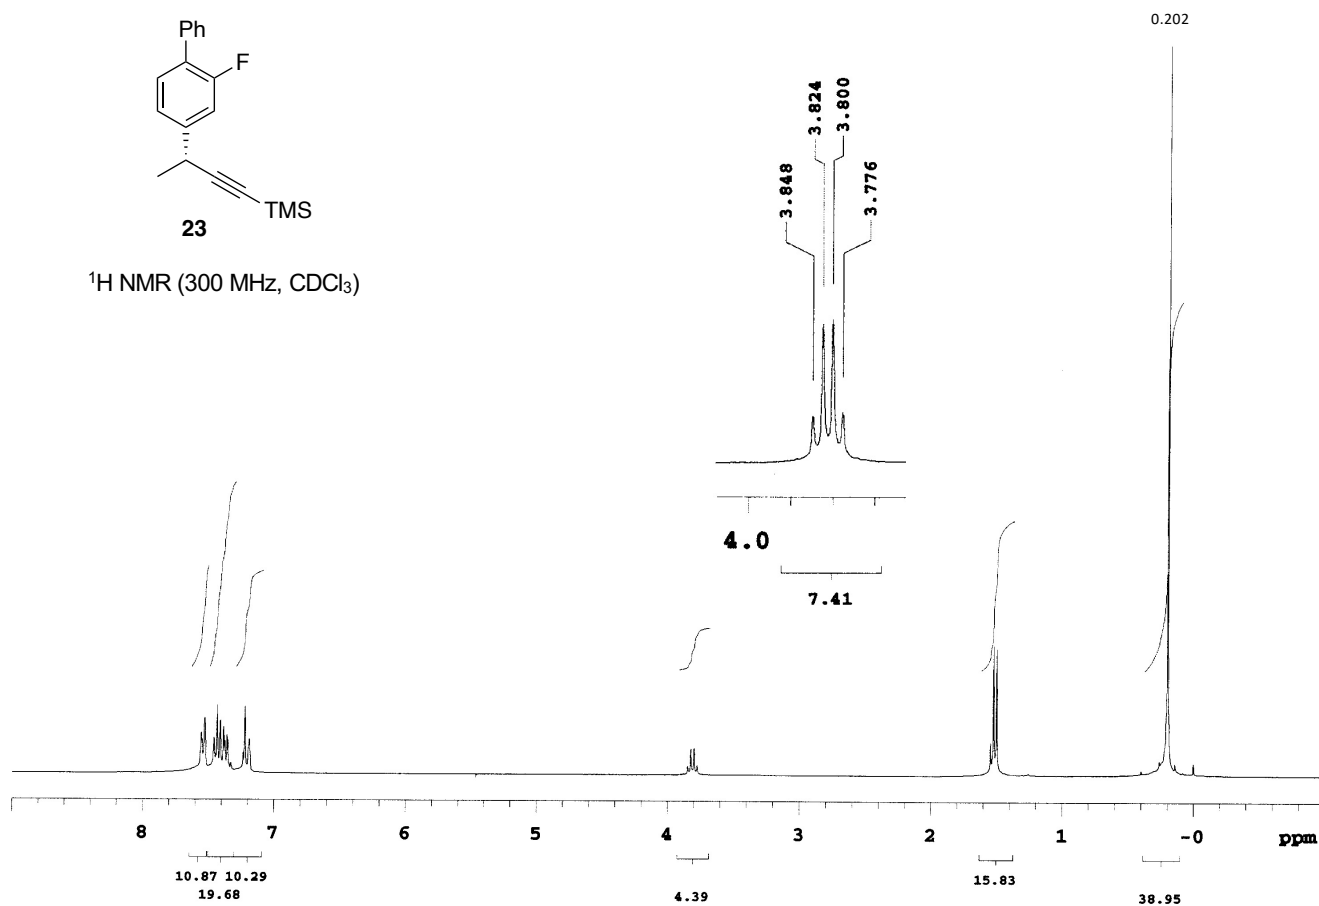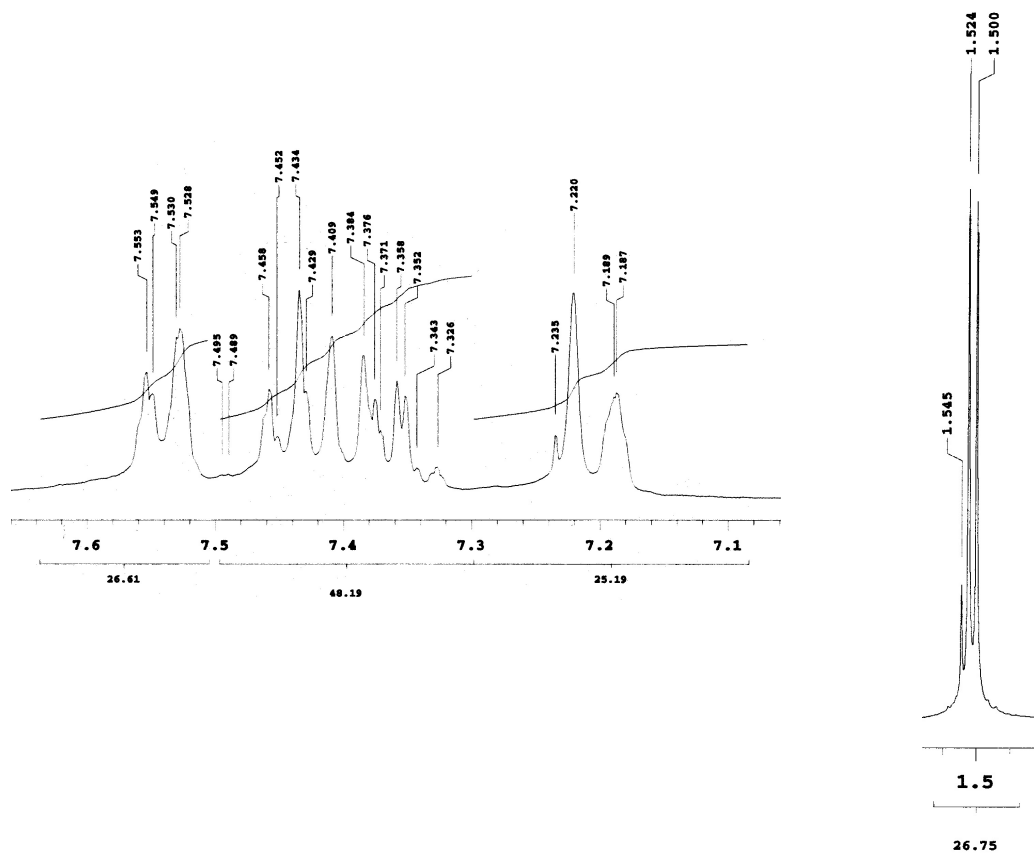

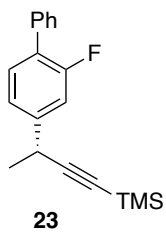

$^{13}\text{C}$  NMR (75 MHz,  $\text{CDCl}_3$ )

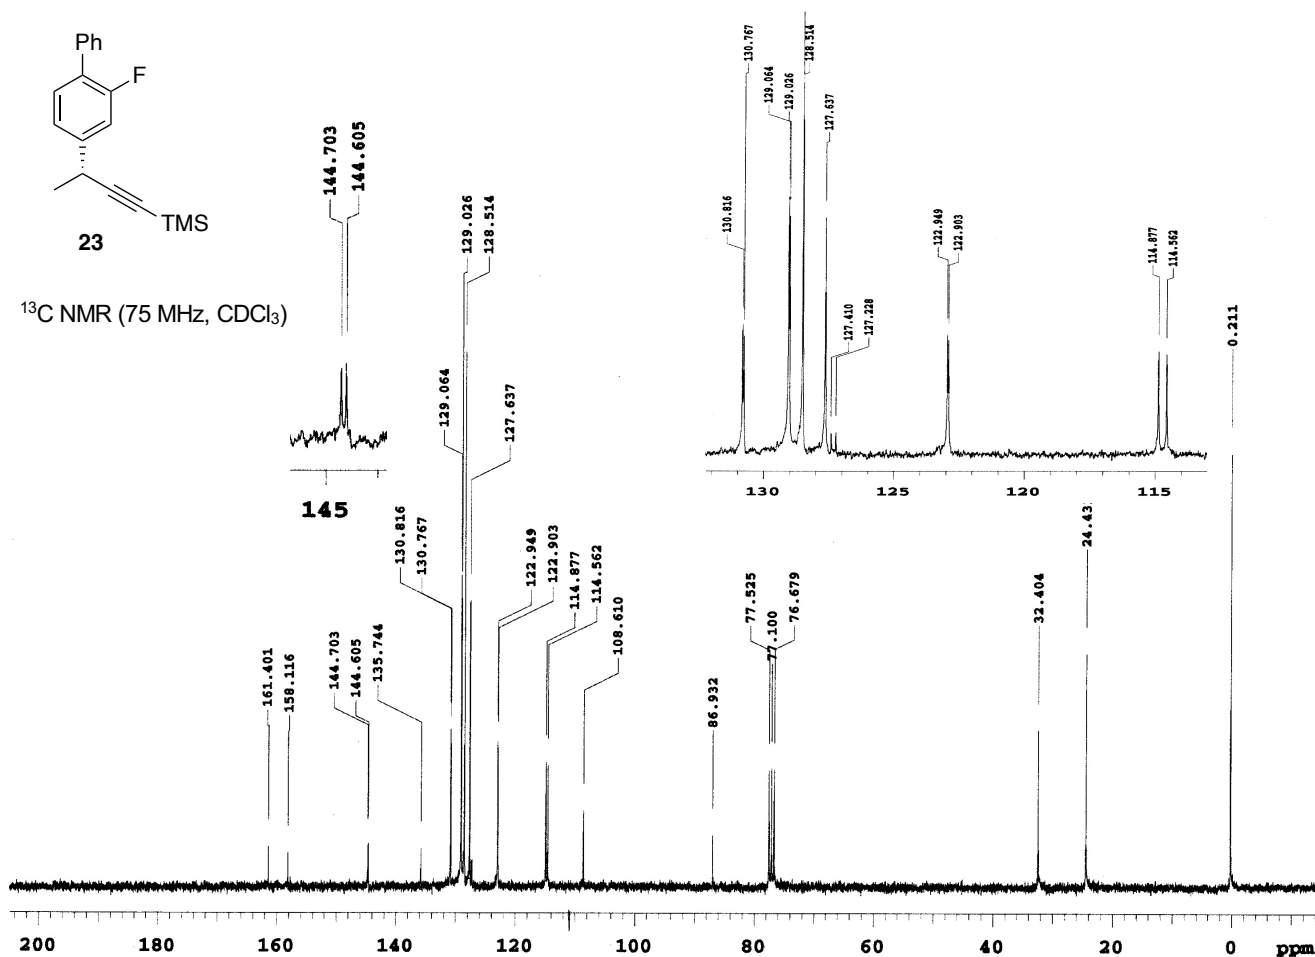

$^{13}\text{C}$ -APT NMR (75 MHz,  $\text{CDCl}_3$ )

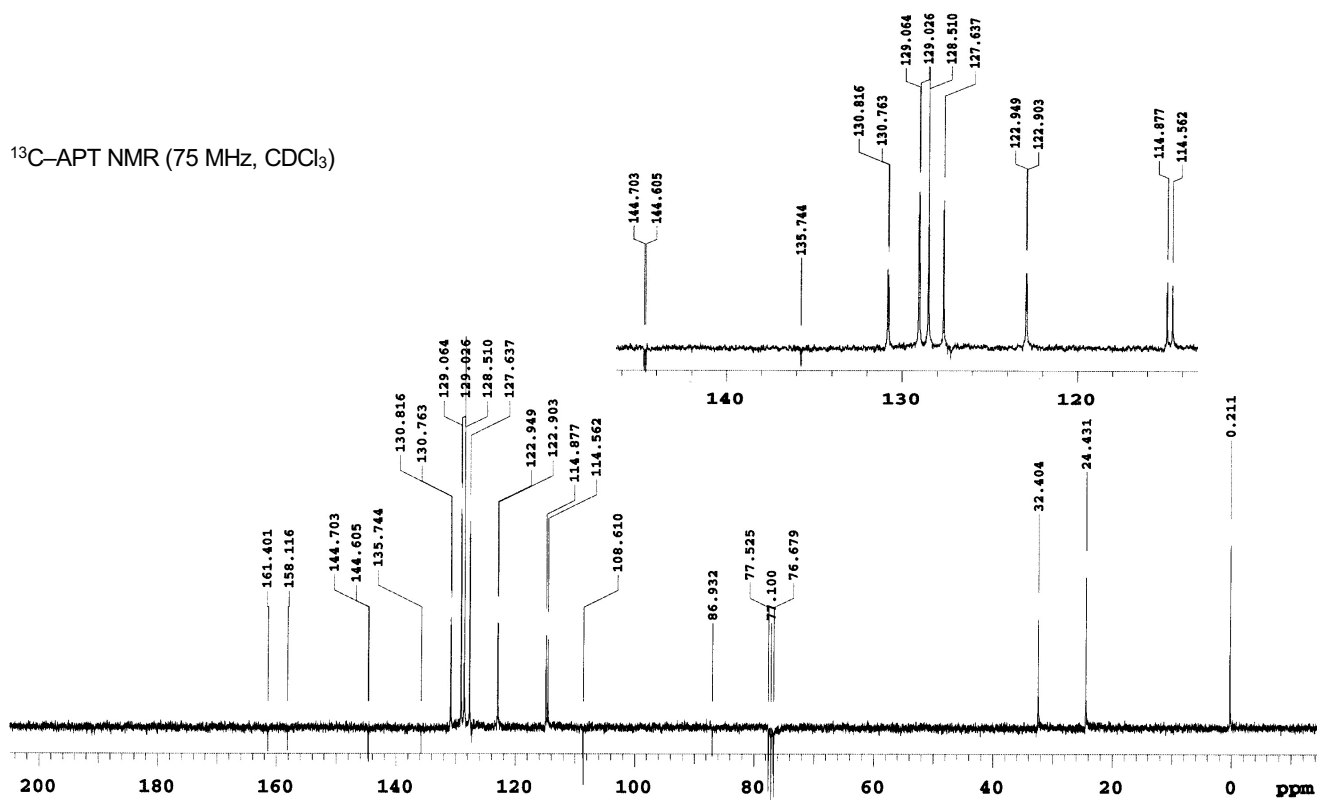

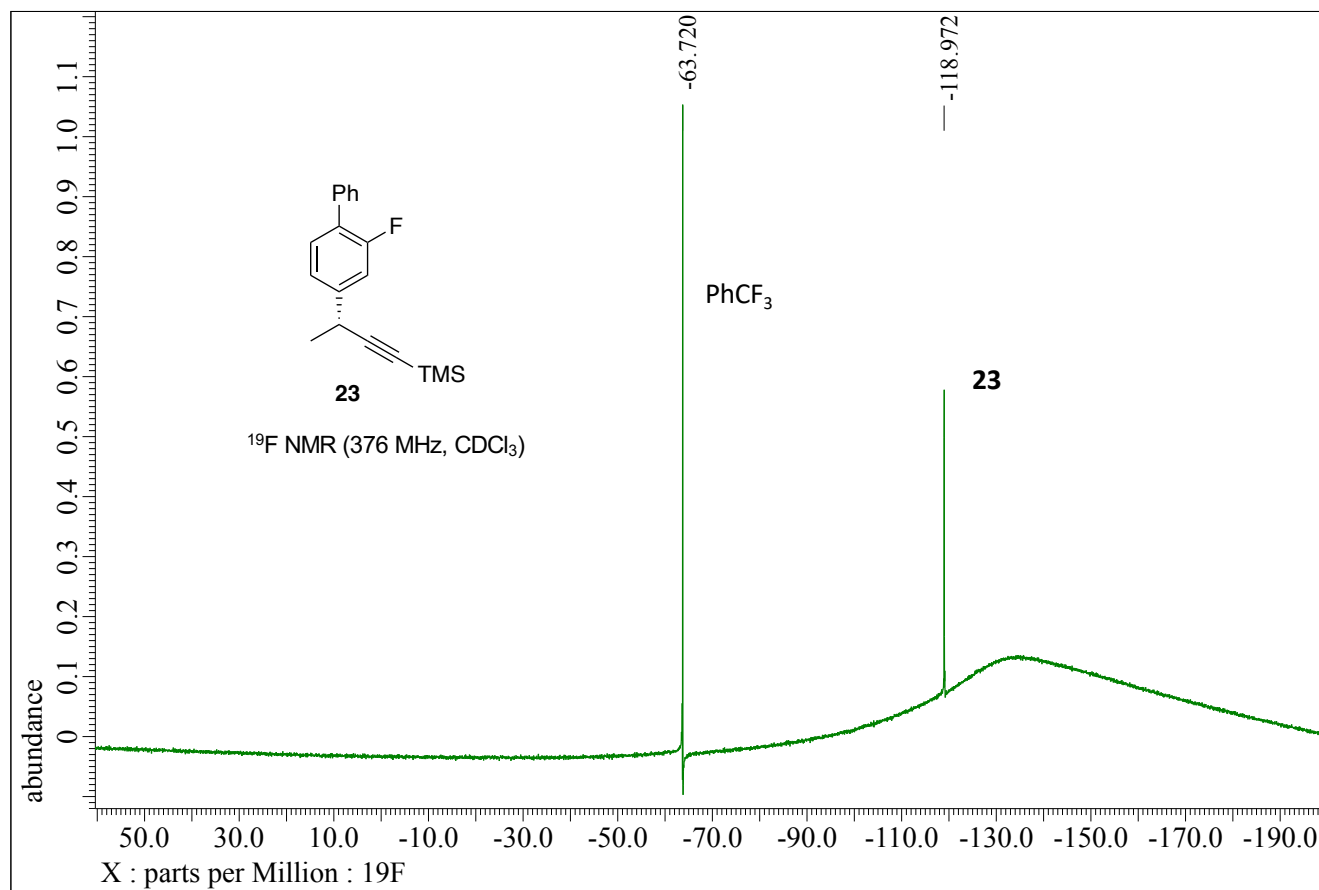

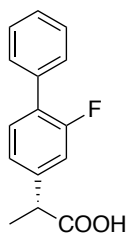

(R)-5

$^1\text{H}$  NMR (300 MHz,  $\text{CDCl}_3$ )

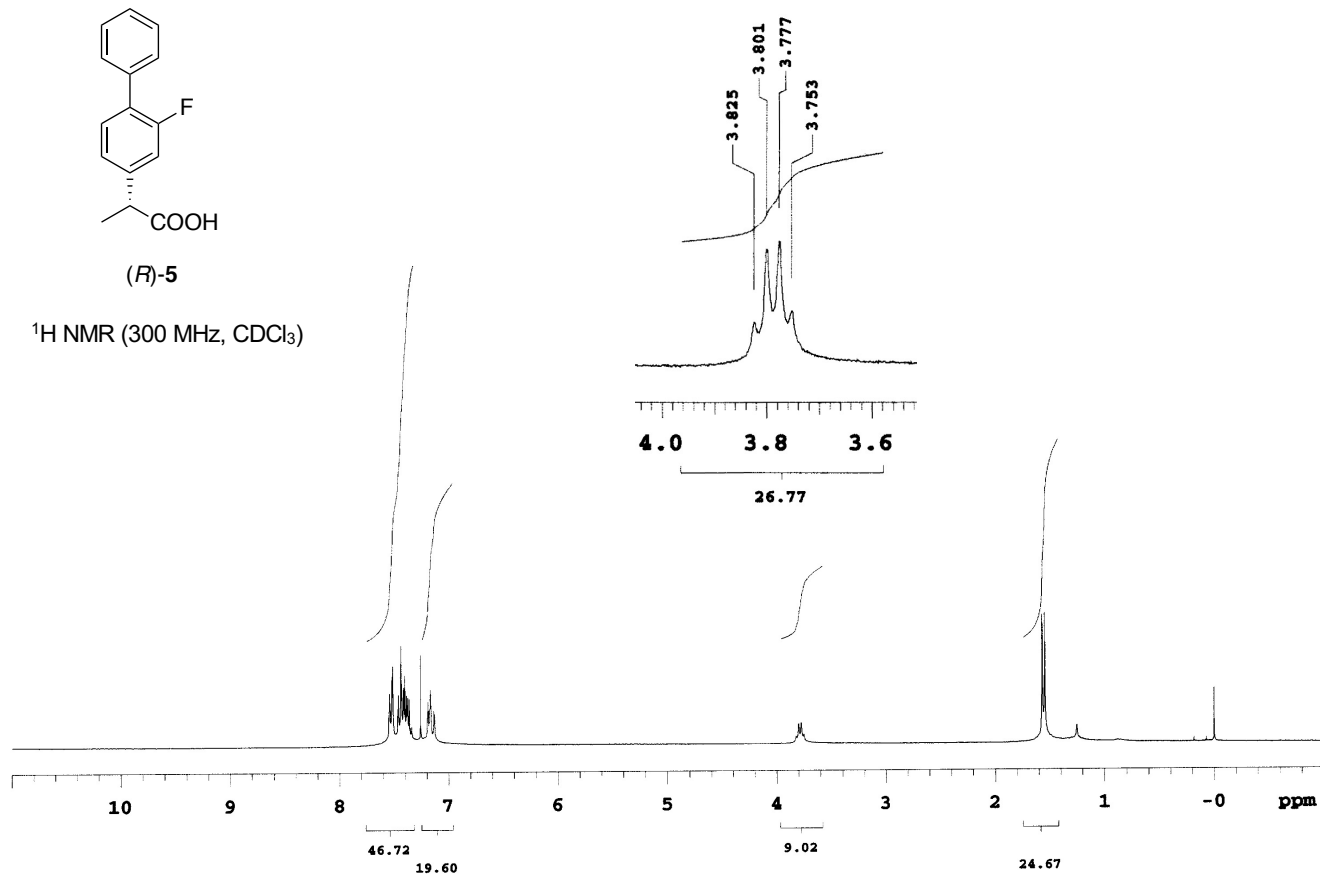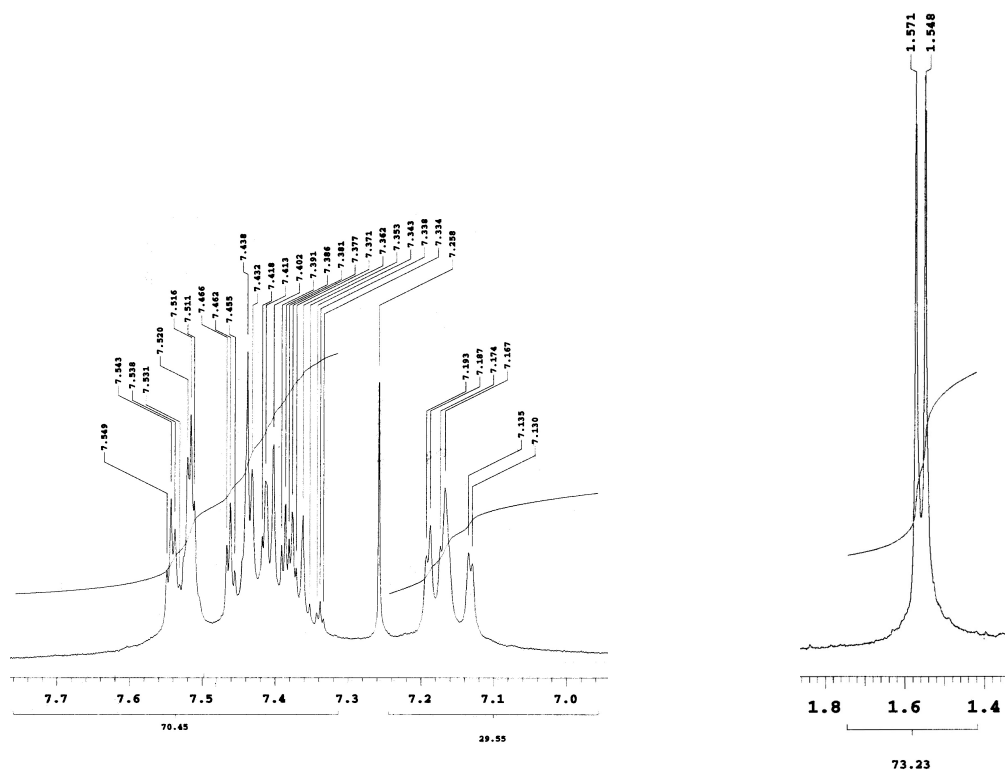

$^{13}\text{C}$  NMR (75 MHz,  $\text{CDCl}_3$ )

Expansion,  
see the next page

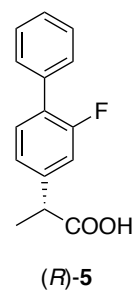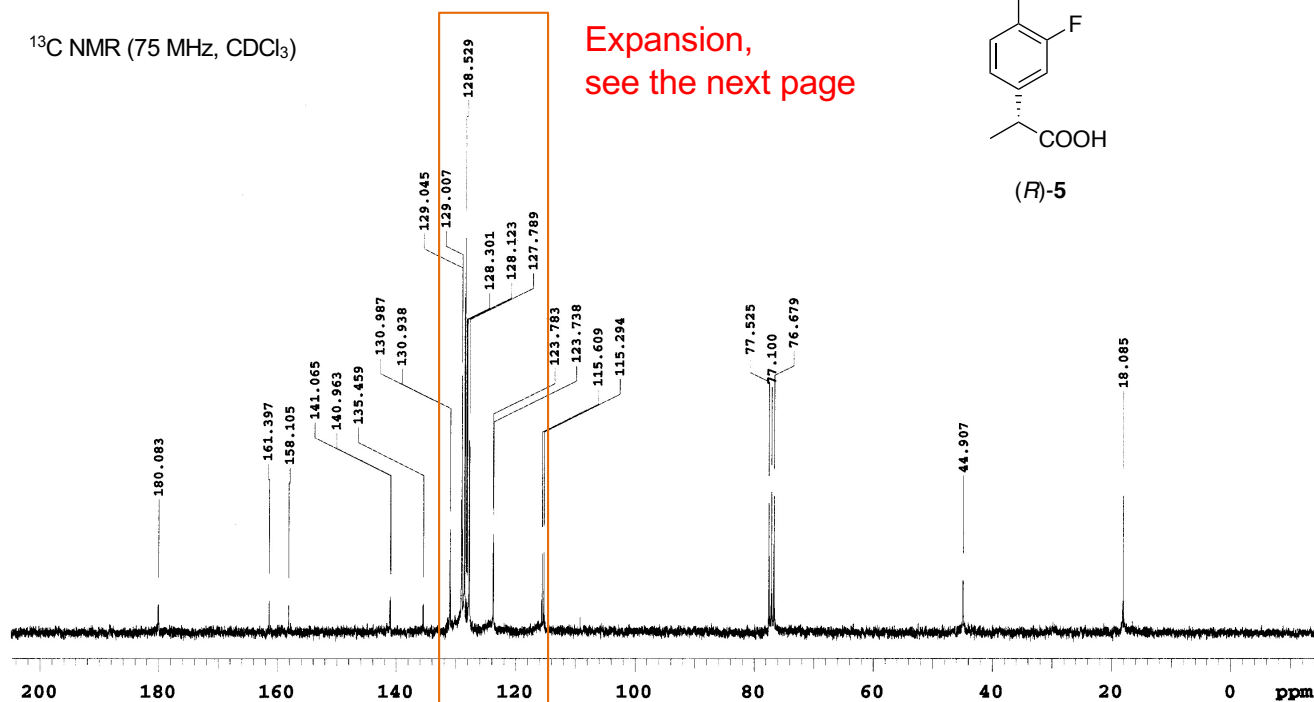

$^{13}\text{C}$ -APT NMR (75 MHz,  $\text{CDCl}_3$ )

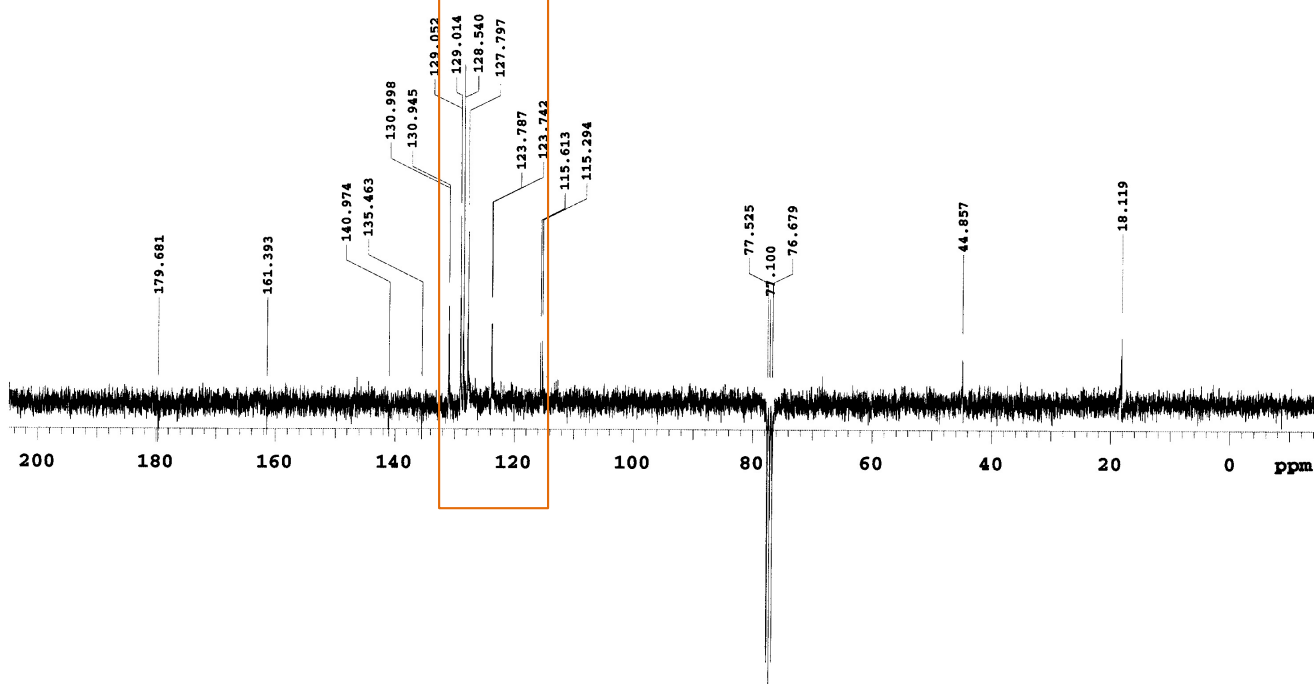

## Expansion

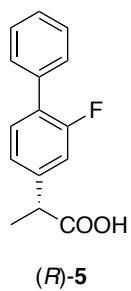

$^{13}\text{C}$  NMR (75 MHz,  $\text{CDCl}_3$ )

d: doublet

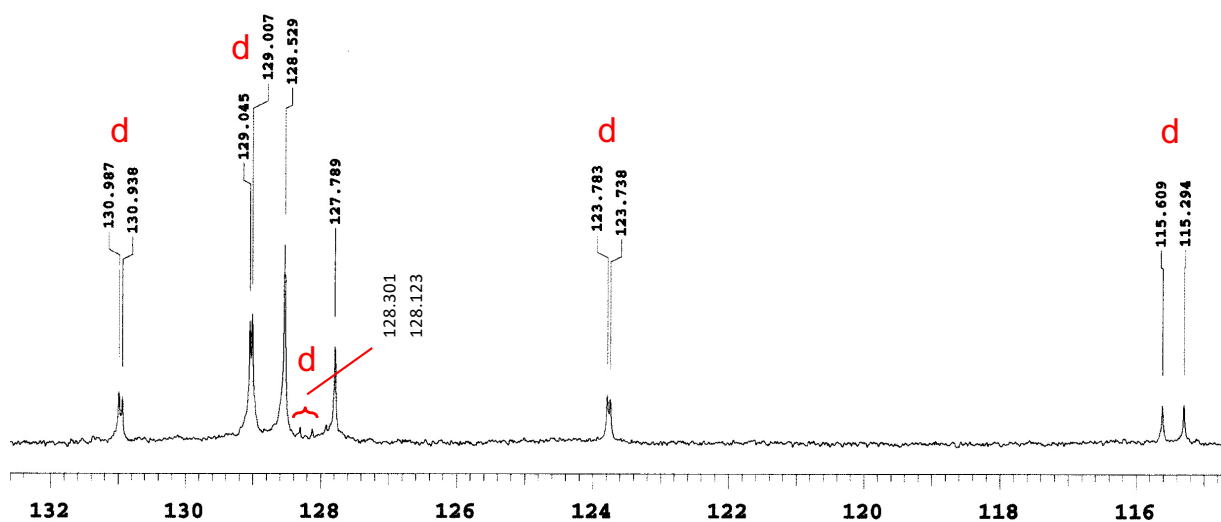

$^{13}\text{C}$ -APT NMR (75 MHz,  $\text{CDCl}_3$ )

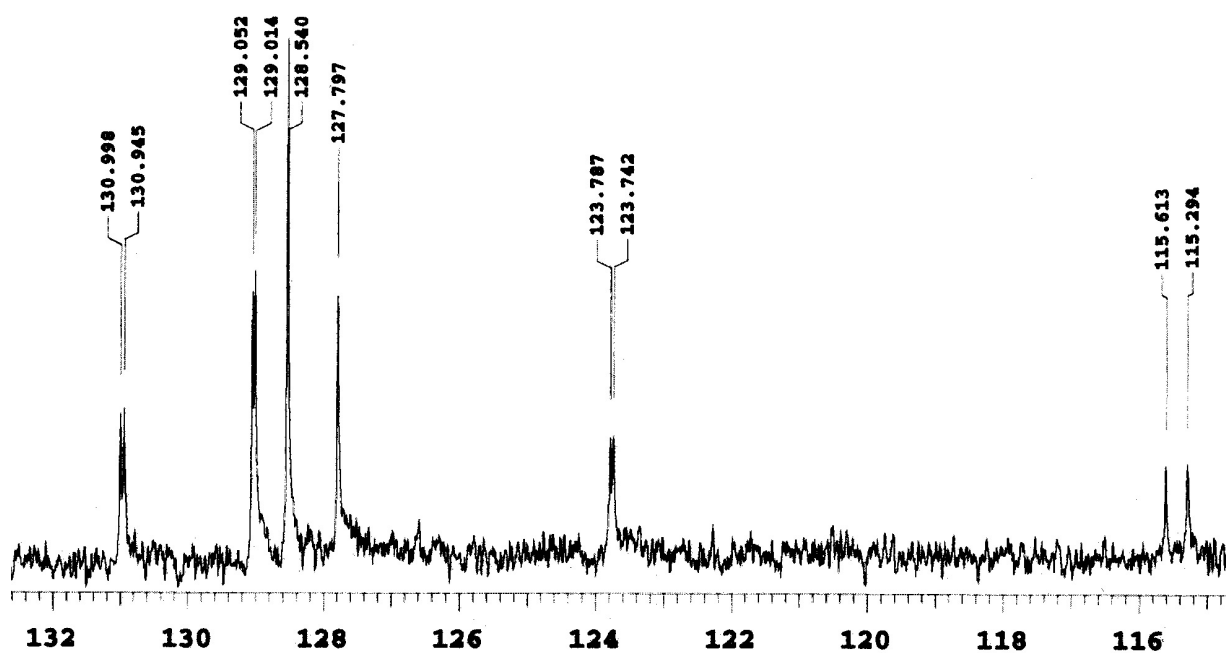

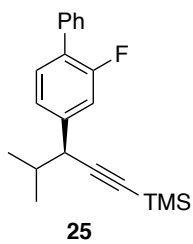

<sup>1</sup>H NMR (300 MHz, CDCl<sub>3</sub>)

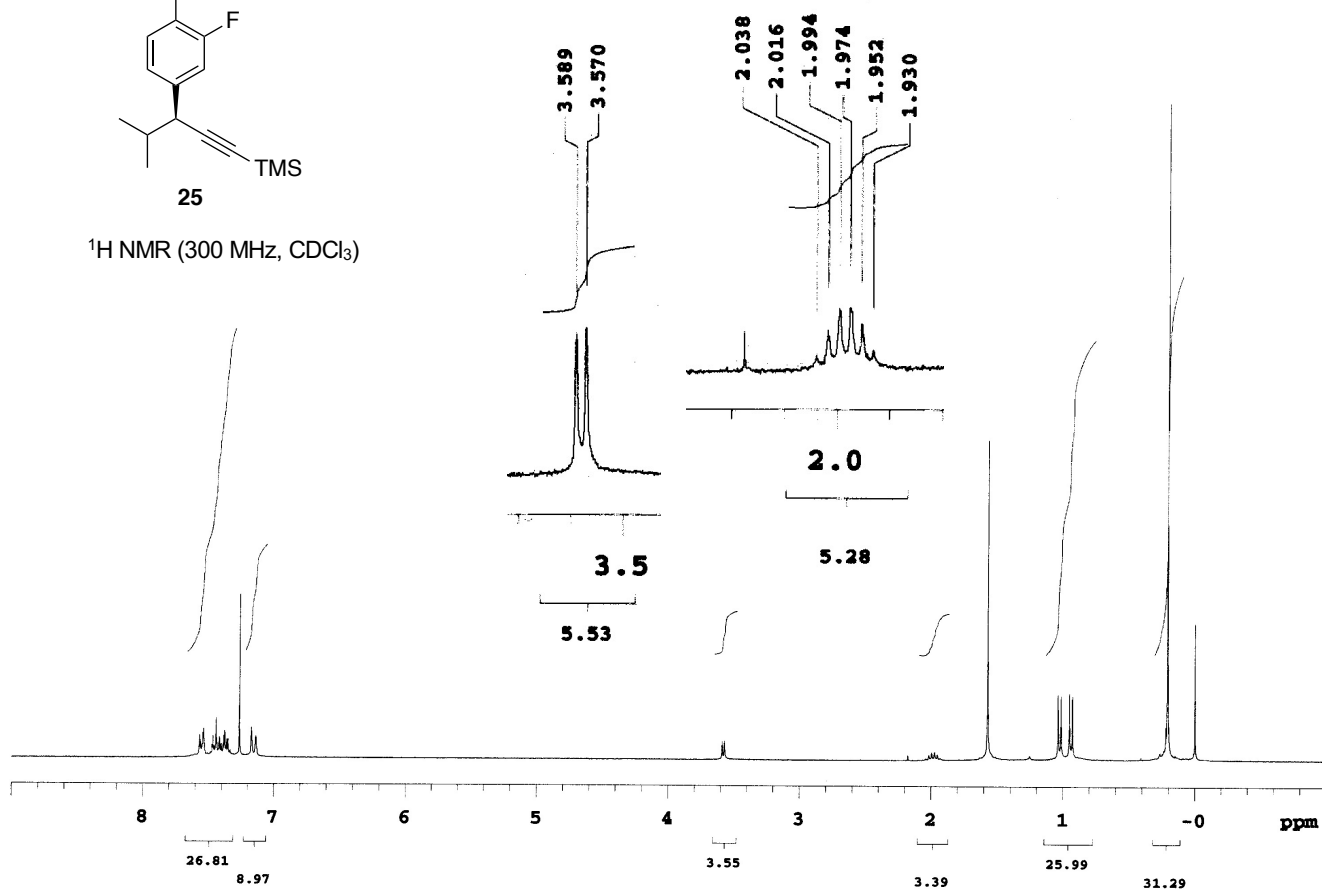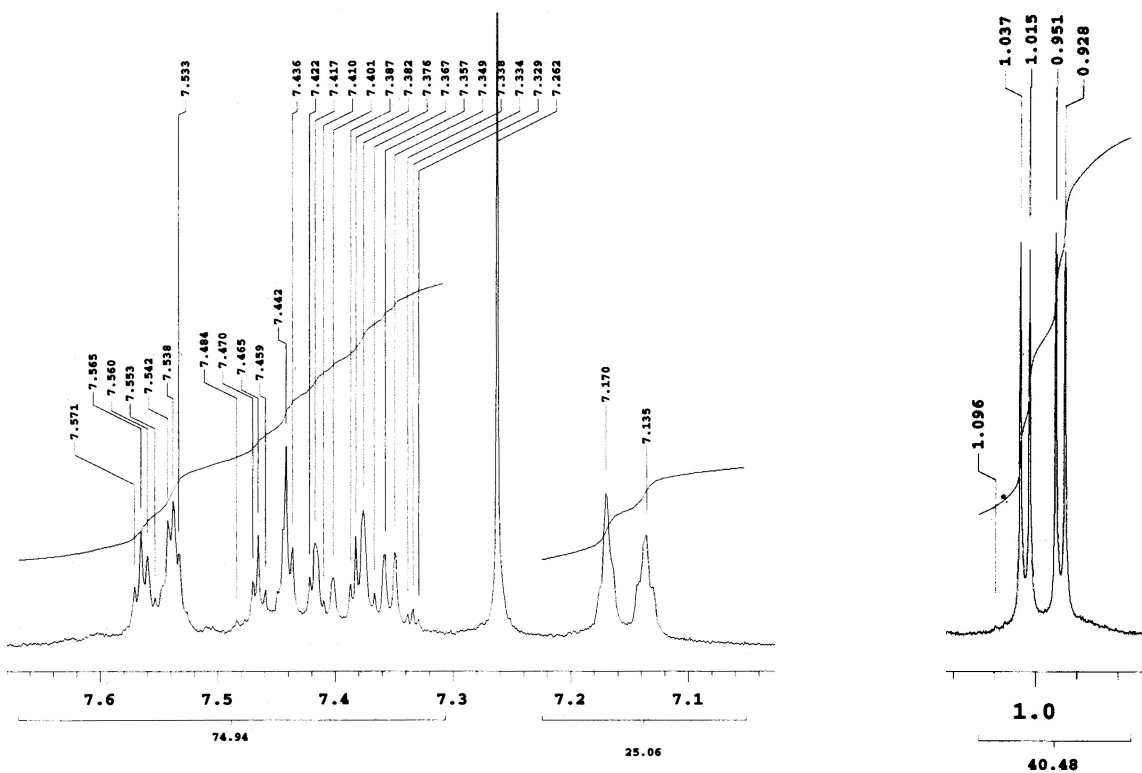



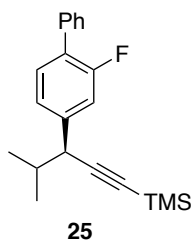

$^{13}\text{C}$  NMR (75 MHz,  $\text{CDCl}_3$ )

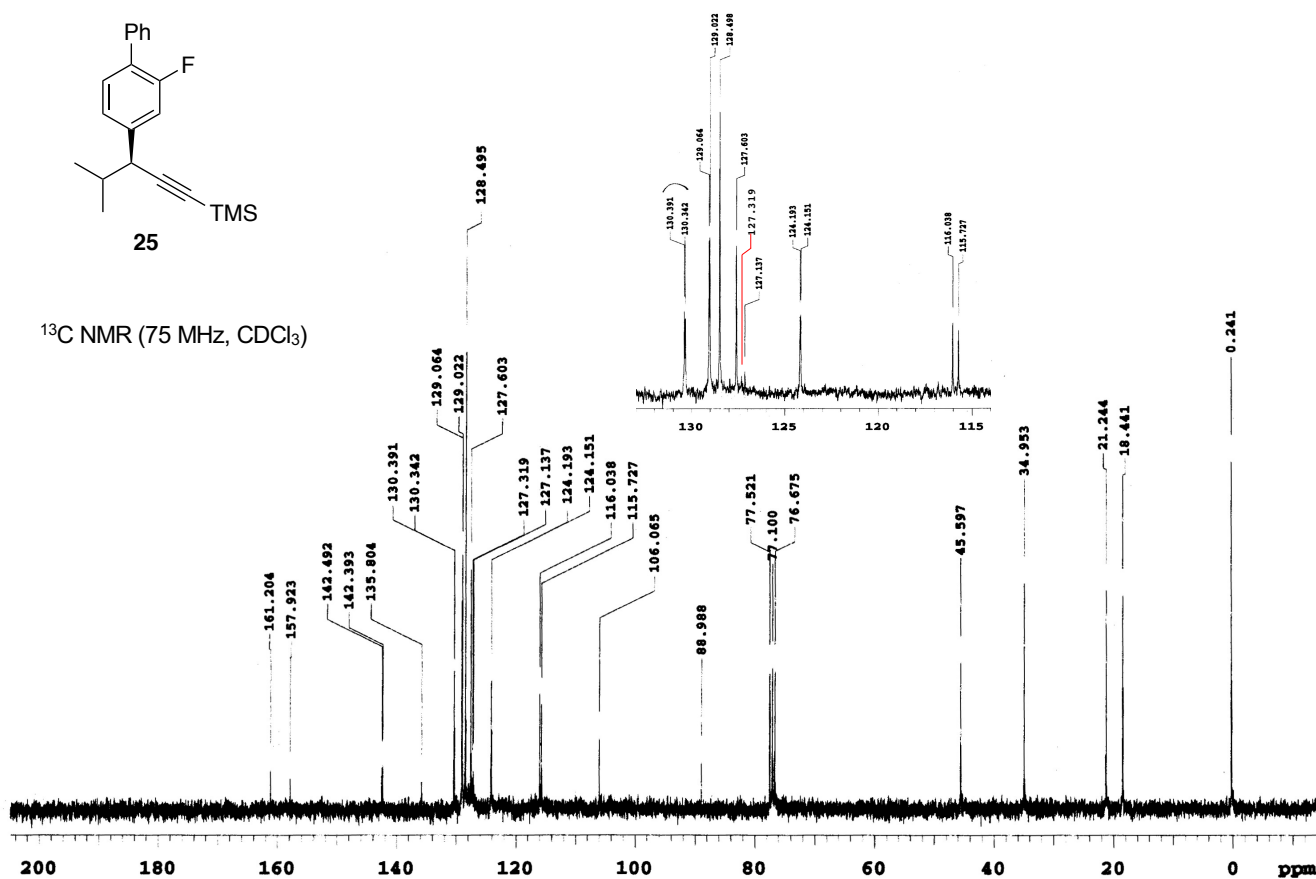

$^{13}\text{C}$ -APT NMR (75 MHz,  $\text{CDCl}_3$ )

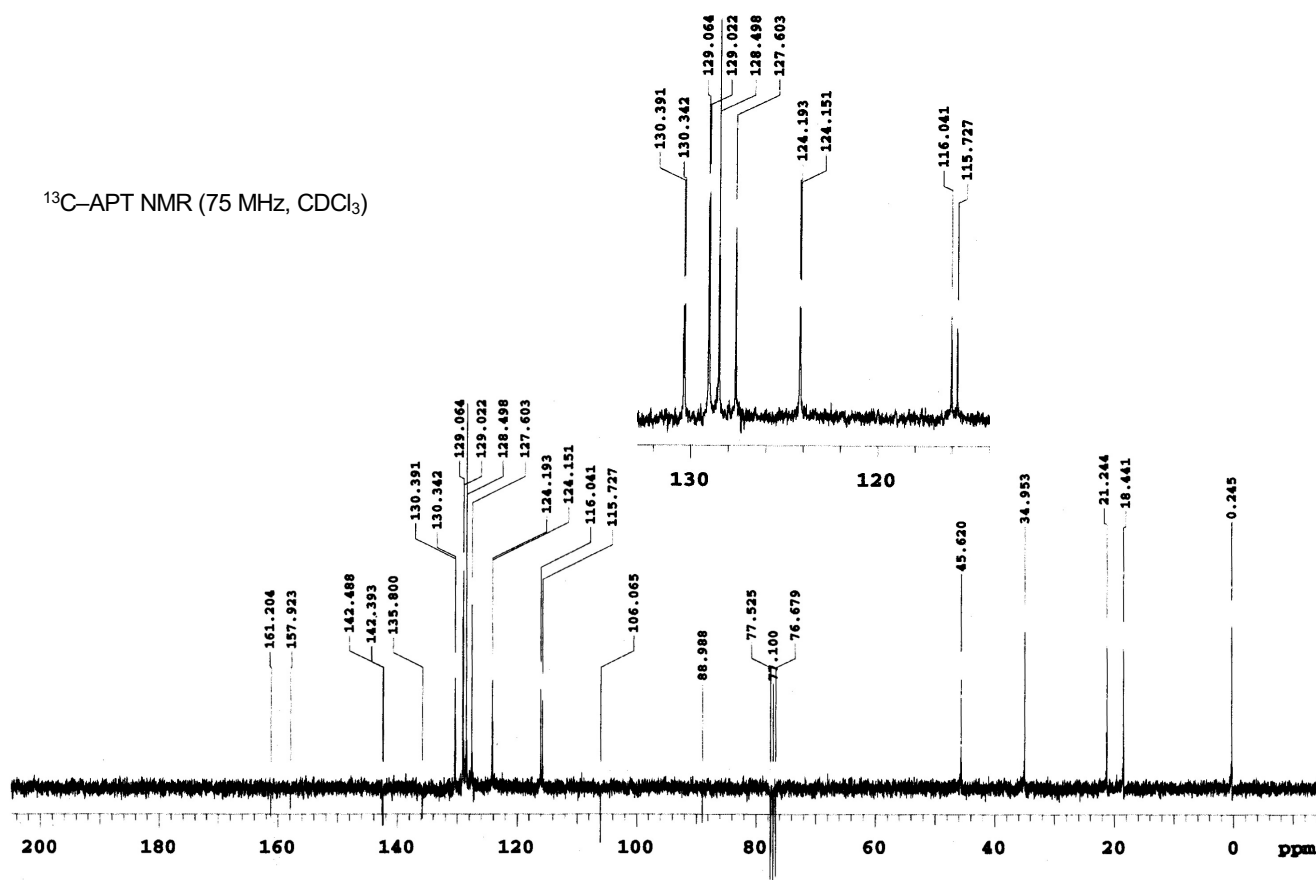

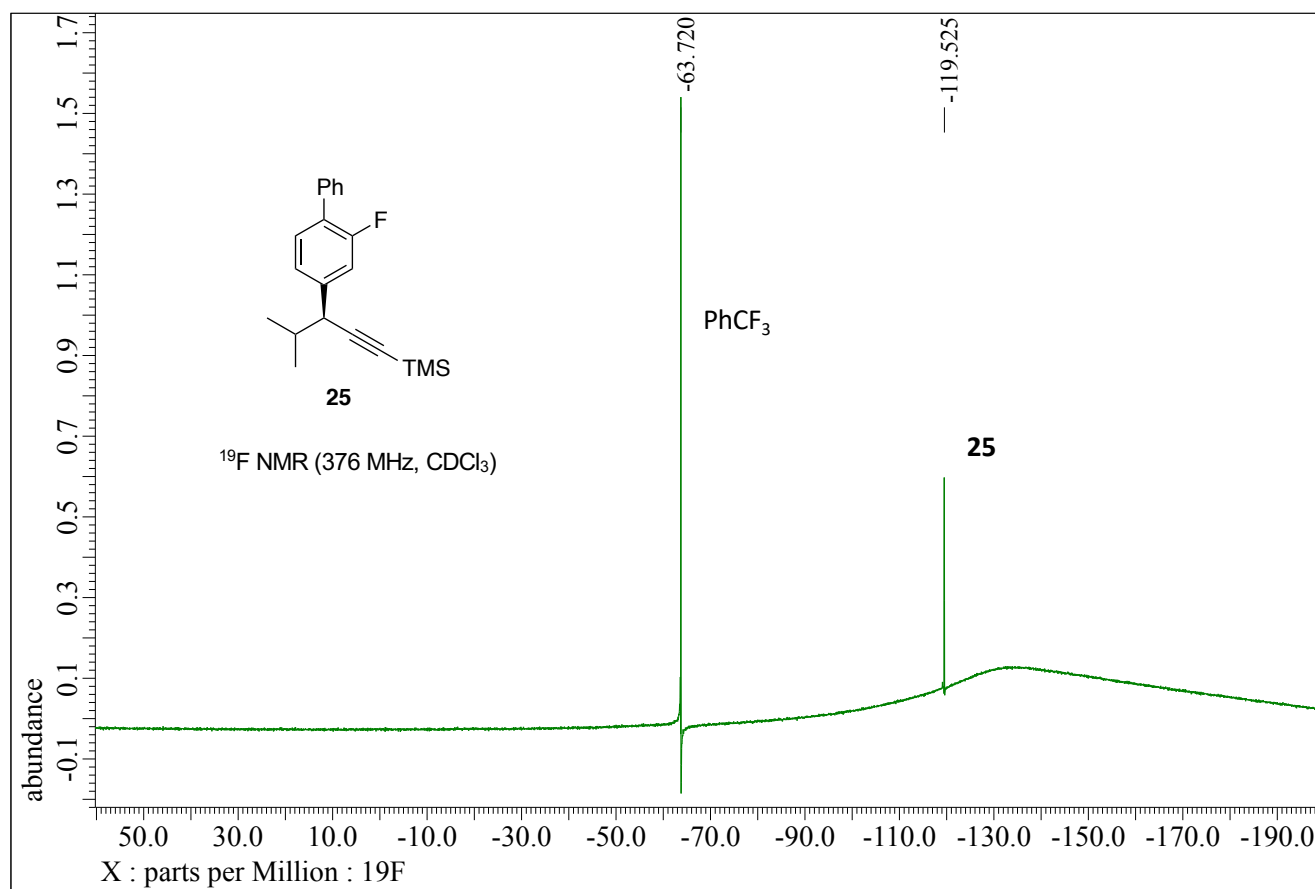

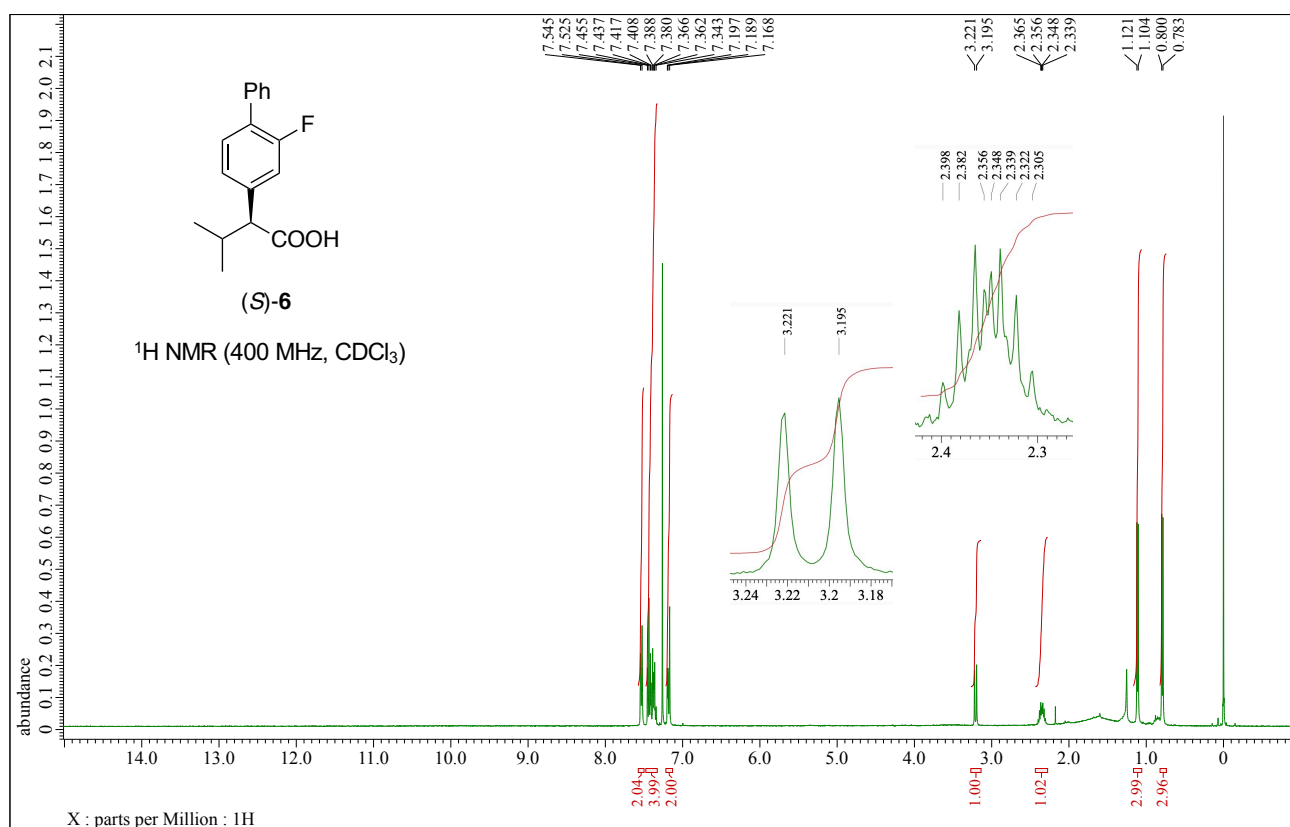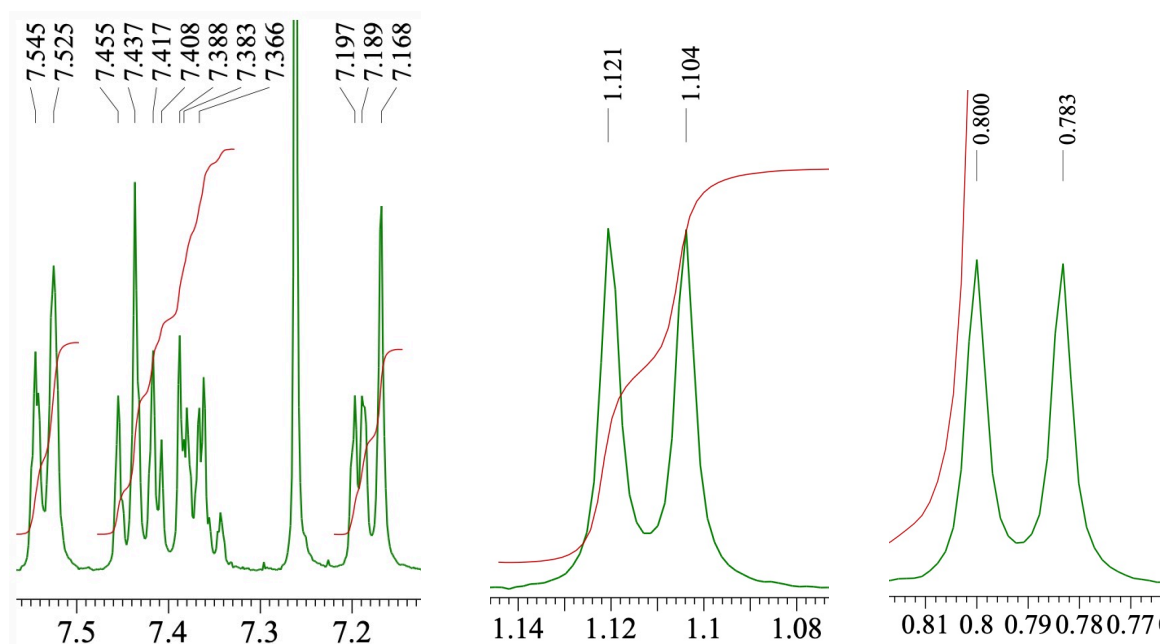

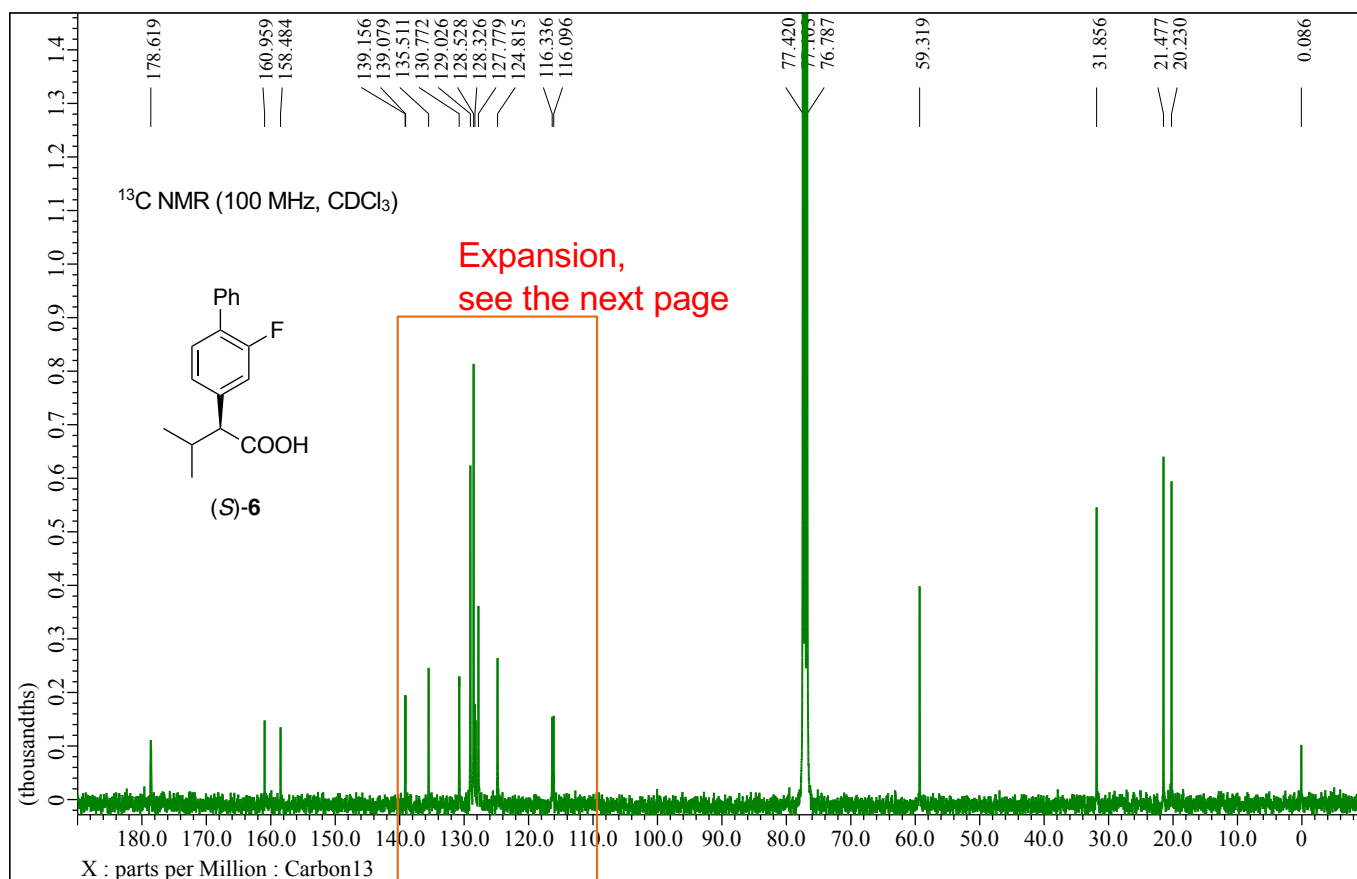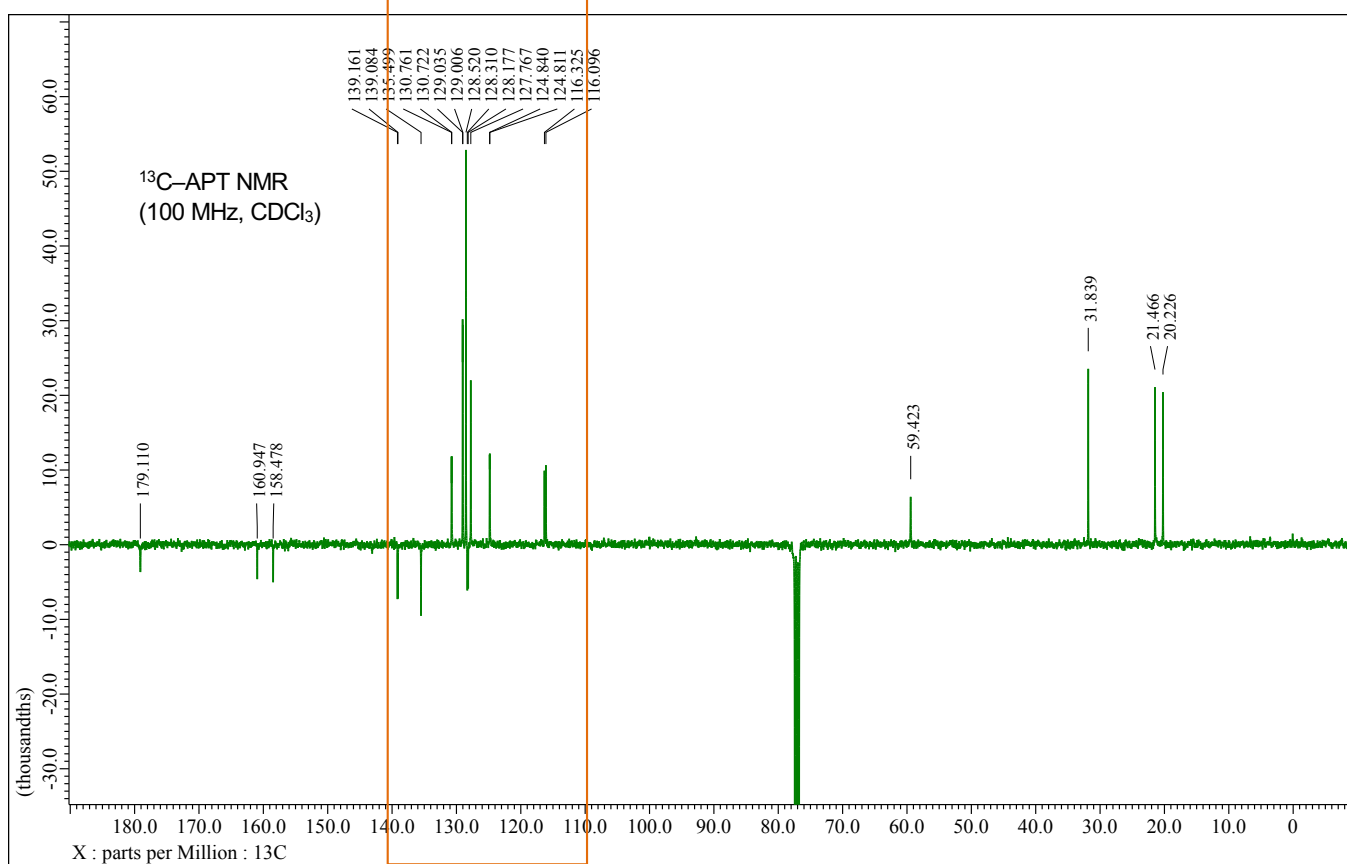

## Expansion

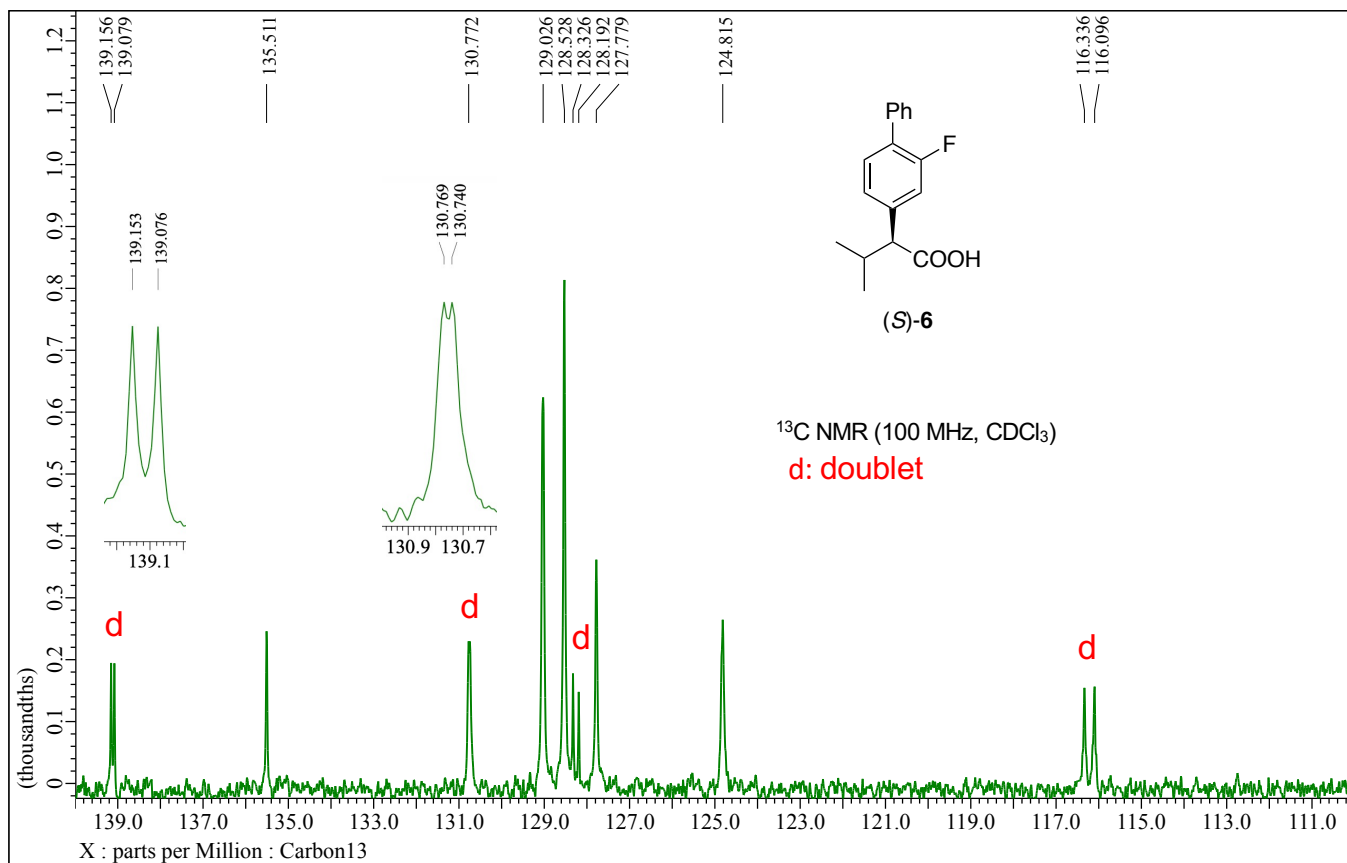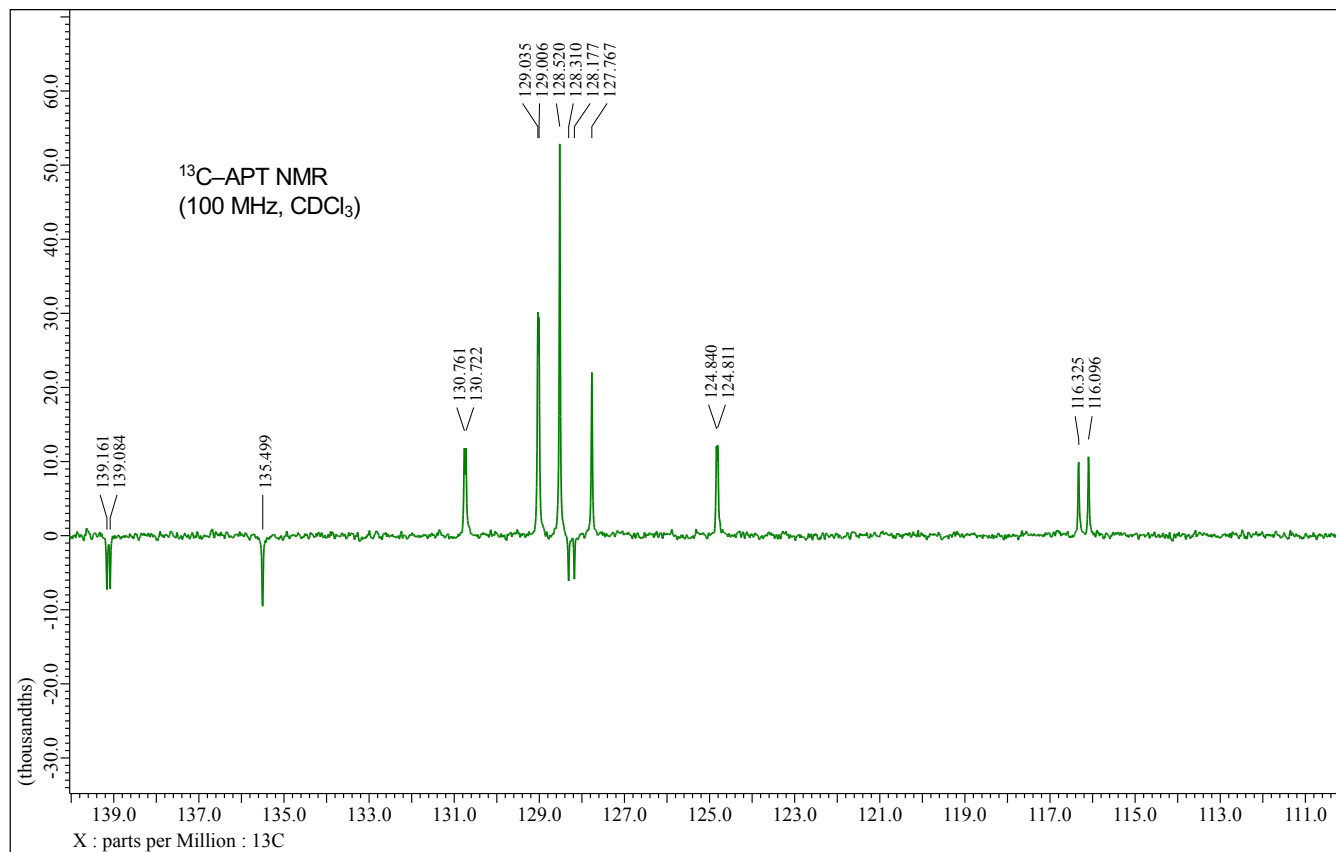

Supplement: d1ob01944a1.pdf [file d1ob01944a1.pdf]
